# **1 A Sense of Place: Transcriptomics Identifies Environmental Signatures** **2 in Cabernet Sauvignon Berry Skins in the Late Stages of Ripening.**

3

4 **Grant R. Cramer<sup>1§</sup>, Noé Cochetel<sup>1</sup>, Ryan Ghan<sup>1</sup>, Agnès**  
5 **Destrac-Irvine<sup>2</sup>, and Serge Delrot<sup>2</sup>**

6 <sup>1</sup>Department of Biochemistry and Molecular Biology, University of Nevada,  
7 Reno, Reno, NV 89557, USA

8 <sup>2</sup>UMR Ecophysiology and Grape Functional Genomics, Institut des Sciences  
9 de la Vigne et du Vin, University of Bordeaux, Villenave d'Ornon, France

10

11 <sup>§</sup>Corresponding author

12 Tel: +1 (775) 784-4204, Fax: +1 (775) 784-1419

13

14 Email addresses:

15 GRC: [cramer@unr.edu](mailto:cramer@unr.edu)

16 RG: [rghan@unr.nevada.edu](mailto:rghan@unr.nevada.edu)

17 NC: [noe.cochetel@gmail.com](mailto:noe.cochetel@gmail.com)

18 AD-I: [agnes.destrac-irvine@inra.fr](mailto:agnes.destrac-irvine@inra.fr)

19 SD: [serge.delrot@inra.fr](mailto:serge.delrot@inra.fr)

20

21

# 1    **Abstract**

## 2    **Background**

3    Grape berry ripening is influenced by climate, the main component of the  
4    “terroir” of a place. Light and temperature are major factors in the vineyard  
5    that affect berry development and fruit metabolite composition.

## 6    **Results**

7    To better understand the effect of “place” on the transcript abundance during  
8    the late stages of berry ripening, Cabernet Sauvignon berries grown in  
9    Bordeaux, France and Reno, NV USA were compared at similar sugar levels  
10    (19 to 26 °Brix, total soluble solids (TSS)). Day temperatures were warmer  
11    and night temperatures were cooler in Reno. TSS was lower in Bordeaux  
12    berries compared to Reno at maturity levels considered optimum for harvest.  
13    RNA-seq analysis identified 4,455 differentially expressed genes (DEGs)  
14    between Bordeaux and Reno grape skins at 22°Brix. Weighted Gene  
15    Coexpression Network Analysis for all expressed transcripts for all four °Brix  
16    levels measured indicated that the majority (80%) of the gene expression  
17    differed significantly between the two locations. Top gene ontology  
18    categories for the common gene sets were translation, photosynthesis, DNA  
19    metabolism and catabolism. Top DEG gene ontology categories at the  
20    22°Brix level involved response to stimulus, biosynthesis and response to  
21    stress. Some DEGs included genes encoding terpene synthases, cell wall  
22    enzymes, kinases, transporters, transcription factors and photoreceptors.  
23    Most circadian clock genes had higher transcript abundance in Bordeaux.  
24    Bordeaux berries had higher transcript abundance with DEGs associated  
25    with seed dormancy, light, auxin, ethylene signaling, powdery mildew

1 infection, phenylpropanoid, carotenoid and terpenoid metabolism, whereas  
2 Reno berries were enriched with DEGs involved in water deprivation, cold  
3 response, ABA signaling and iron homeostasis.

4

## 5 **Conclusions**

6 Transcript abundance profiles in the berry skins at maturity were highly  
7 dynamic. RNA-seq analysis identified a smaller (20% of total) common core  
8 set of ripening genes that appear not to depend on rootstock, vineyard  
9 management, plant age, soil and climatic conditions. Much of the gene  
10 expression differed between the two locations and could be associated with  
11 multiple differences in environmental conditions that may have affected the  
12 berries in the two locations; some of these genes may be potentially  
13 controlled in different ways by the vinegrower to adjust final berry  
14 composition and reach a desired result.

15

## 16 **Keywords**

17 abiotic stress, biotic stress, grape berry development, RNA-seq,  
18 transcriptomics, *Vitis vinifera* L.

19

## 20 **Background**

21 *Vitis vinifera* grapevines originated approximately 65 million years ago from  
22 Eurasia and have been cultivated for at least the last 8000 years for its fruit  
23 that are crushed to make wine [1]. Grapevines are now grown throughout the  
24 world in many kinds of environments.

1 Grape berry development is a complex process involving three  
2 developmental phases and multiple hormones [2, 3]. It is in the latter ripening  
3 phase that many compounds involved in flavor and aromas are synthesized,  
4 conjugated or catabolized [2, 3]. Most of these compounds reside in the skin  
5 of the berry and seem to develop in the very last stages of berry  
6 development [4-6].

7 Aroma and flavor are important sensory components of wine. They are  
8 derived from multiple classes of compounds in grapes including important  
9 volatile compounds from the grape and from yeast metabolism during grape  
10 fermentation [5, 6]. Each grape cultivar produces a unique set of volatile and  
11 flavor compounds at varying concentration that represents its wine typicity or  
12 typical cultivar characteristics [6]. Esters and terpenes are volatile compound  
13 chemical classes largely responsible for the fruity and floral aromas in wines  
14 [5, 6]. Esters are largely produced during yeast fermentation from grape-  
15 derived products such as aliphatic alcohols and aldehydes [7, 8]. Grape  
16 lipooxygenases are thought to provide the six carbon precursors from fatty  
17 acids for the synthesis of the fruity aroma, hexyl acetate [8], in yeast during  
18 wine fermentation. Terpenes mostly originate from the grapes and are found  
19 in both the free and bound (glycosylated) forms. Both plant fatty acid and  
20 terpenoid metabolism pathways are very sensitive to the environment [9-13].

21 Climate has large effects on berry development and composition [14-16].  
22 Besides grape genetics other factors may influence metabolite composition  
23 including the local grape berry microbiome [17], the soil type [15] and the  
24 rootstock [18-22]. While there is evidence that rootstock can affect fruit  
25 composition and transcript abundance, this effect appears to be minor

1 relative to other environmental factors [18, 19, 21]. Many cultural practices  
2 used by the grape grower may directly or indirectly affect the environment  
3 sensed by the grapevine (e.g. row orientation, planting density, pruning, leaf  
4 removal, etc.) [23, 24]. Temperature and light are major contributors to  
5 “terroir”. The terroir term is used in the wine industry to acknowledge the  
6 influence of the environment on the grapevine and the distinctive  
7 characteristics that are contributed to the typicity of a wine [2, 14, 15, 25]. It  
8 includes the biotic, abiotic and soil environments as well as the viticultural  
9 practices. In the present work, we will use the term “place” to address all of  
10 the above except for the viticultural practices.

11 Recently, a transcriptomic approach was used to elucidate the common  
12 gene subnetworks of the late stages of berry development when grapes are  
13 normally harvested at their peak maturity [4]. One of the major subnetworks  
14 associated with ripening involved autophagy, catabolism, RNA splicing,  
15 proteolysis, chromosome organization and the circadian clock. An integrated  
16 model was constructed to link light sensing with the circadian clock  
17 highlighting the importance of the light environment on berry development. In  
18 this report, in order to get a better understanding of how much of the gene  
19 expression in Cabernet Sauvignon berry skin could be attributed to  
20 environmental influences, we tested the hypothesis that there would be  
21 significant differences in gene expression during the late stages of Cabernet  
22 Sauvignon berry ripening between two widely different locations: one in  
23 Reno, NV, USA (RNO) and the other in Bordeaux, France (BOD). The  
24 analysis revealed a core set of genes that did not depend on location,  
25 climate, vineyard management, grafting and soil properties. Also, the

1 analysis revealed keys genes that are differentially expressed between the  
2 two locations and links some of these differences to the effects of  
3 temperature and other environmental factors on aromatic and other quality-  
4 trait-associated pathways. Many gene families were differentially expressed  
5 and may provide useful levers for the vinegrower to adjust berry composition.  
6 Among others, these families encompassed genes involved in amino acid  
7 and phenylpropanoid metabolism, as well as aroma and flavor synthesis.

## 9 **Results**

### 10 *Background Data for a “Sense of Place”*

11 To test the hypothesis that the transcript abundance of grape berries during  
12 the late stages of ripening differed in two locations with widely different  
13 environmental conditions, we compared the transcript abundance of grape  
14 berry skins in BOD and RNO. The vineyards were planted in 2004 and 2009  
15 in RNO and BOD, respectively. BOD vines were grafted on to SO4 rootstock  
16 and RNO vines were grown on their own roots. Both BOD and RNO used a  
17 vertical shoot positioning trellis design. The environmental variables between  
18 the two vineyard sites had a number of differences. BOD has a slightly more  
19 northern latitude than RNO; consequently, day lengths were slightly longer in  
20 BOD at the beginning of harvest and slightly shorter at the end of harvest  
21 (Table 1). On the final harvest dates, the day length differed between the two  
22 locations by about 30 min.

23 Average monthly maximum temperatures were warmer in RNO than BOD,  
24 but minimum September temperatures were cooler (Table 1). This made for  
25 an average daily day/night temperature differential of 10°C and 20°C during

1 the harvest periods for BOD and RNO, respectively. The day temperatures  
2 were warmer by about 6°C and the night time temperatures were about 4°C  
3 cooler in RNO.  
4 The Reno site was much drier than the Bordeaux site (Table 1). September  
5 monthly precipitation totals were 65.5 and 2.03 mm and had average relative  
6 humidities of 74 and 34% for BOD and RNO, respectively. The soil at the  
7 BOD site was a gravelly soil with a pH of 6.2 and the soil at the RNO site  
8 was a deep sandy loam with a pH of 6.7. No pathogen, nutrient deficiency or  
9 toxicity symptoms were evident in the vines.

10

# 11 *Transcriptomics*

12 The analysis of transcript profiles of Cabernet Sauvignon grapes harvested  
13 in RNO in September of 2012 was previously described [4]. Individual berry  
14 skins were separated immediately from the whole berry and the individual  
15 sugar (°Brix) level of the berry was determined. Similarly, Cabernet  
16 Sauvignon berry skins from BOD were harvested from the middle of  
17 September in 2013 until the end of the first week of October (Table 1). Berry  
18 skins were separated and analyzed in the same manner as in RNO with the  
19 same Illumina technology. Grapes were harvested at a lower °Brix range in  
20 BOD (19.5 to 22.5°Brix) than in RNO (20 to 26°Brix) because fruit maturity  
21 for making wine is typically reached in the BOD region at a lower sugar level.  
22 Transcript abundance of the RNA-seq reads from both RNO and BOD was  
23 estimated using Salmon software (0.9.1) tools [26] with the V2 assembly and  
24 the V3 gene model annotation of the PN40024 reference genome for  
25 grapevine [27]. The TPM (transcripts per million) were computed for each

1 gene from each experimental replicate (n = 3) from berry skins at different  
2 sugar levels ranging from 19 to 26°Brix (Additional File 1).

3 Functional annotation of the genes from the V2 assembly/V3 annotation of the  
4 grapevine genome [27] was not yet performed at the time of our analyses, so  
5 we performed our own functional annotation (Additional file 2) using different  
6 versions of the Arabidopsis protein database, the V1 PN40024 *Vitis vinifera*  
7 reference genome annotation and the refseq plant protein database (see  
8 Materials and Methods). Among the 42,413 genes, approximately 91% of  
9 them were annotated (*i.e.* matched to one of the database accessions).

10 Two approaches were used to analyze the transcriptomic data, one focused  
11 on expression at one similar sugar level and one more comprehensive, using  
12 all of the sugar levels. Since sugar levels were not exactly the same between  
13 the two locations, differentially expressed genes (4445 DEGs at an FDR p-  
14 value < 0.05) were identified between the two locations at the sugar level  
15 closest to the 22°Brix level (21.5°Brix in BOD vs 22°Brix in RNO) using  
16 DESeq2 [28] (Additional file 3). DEGs will refer to this set of genes throughout  
17 this manuscript. Gene set enrichment analysis with topGO was determined for  
18 these 4445 genes (Additional file 4) and the top gene ontology (GO) categories  
19 for biological processes based on number of genes identified were response  
20 to stimulus (1464 genes, corrected p-value = 3.13E-28), biological regulation  
21 (1271 genes, corrected p-value = 5.00E-07) and biosynthetic process (1260  
22 genes, corrected p-value = 3.50E-09). Another important and highly significant  
23 category was response to stress (834 genes, corrected p-value = 1.03E-24).

24 There were 625 GO categories in total that were significantly enriched  
25 (Additional file 4). The relationship between the top 25 GO categories can be



1 seen in Additional file 5. We use the term “significantly” throughout this text to  
2 mean statistically significant at or below a p-value of 0.05. Amongst the top  
3 stimulus subcategories with the largest number of genes were hormone  
4 stimulus (513 genes; 287 of which were related to ABA stimulus), abiotic  
5 stimulus (518 genes) and biotic stimulus (283 genes). There were many other  
6 environmental stimuli categories with significant gene set enrichment including  
7 response to light stimulus (216 genes), response to osmotic stress (154  
8 genes), and response to temperature stimulus (153 genes).

9 Using a more powerful approach to finely distinguish the expression data for  
10 all sugar levels, Weighted Gene Coexpression Network Analysis (WGCNA)  
11 identified gene sets common to and differentially expressed between BOD  
12 and RNO. All transcripts for all °Brix levels (Additional file 1) were used in  
13 this analysis. Additional details of the analysis are described in the Materials  
14 and Methods section. Twenty-two modules or gene subnetworks were  
15 defined (Additional file 6) and a heat map was generated displaying the  
16 module-trait relationships (Additional file 7); the grey module is not a real  
17 module but a place to put all genes not fitting into a real module. Nine  
18 modules had similar profiles for BOD and RNO (p-value > 0.05); these  
19 included darkred, lightgreen, cyan, lightyellow, grey60, royalblue, magenta,  
20 midnightblue and tan. The expression of approximately 19.5% (5845 out of  
21 29,976) of the genes were similar (not significantly different) in both  
22 locations. Gene set enrichment analysis was performed with genes that had  
23 a kME > 0.80 for all modules (Additional file 8). The similar gene sets in  
24 common with both locations with decreasing transcript abundance as sugar  
25 levels increased were enriched with the GO categories involving translation

1 (lightgreen module) and photosynthesis (cyan module). The common gene  
2 sets with increasing transcript abundance as sugar levels increased were  
3 enriched with the GO categories involving DNA metabolism (magenta  
4 module) and catabolism (tan module).

5 Most modules were positively or negatively correlated with BOD and RNO  
6 berries (e.g. blue, black, yellow, red, turquoise, etc.). The blue module was  
7 one of the largest modules and consisted of 4018 genes; it had the most  
8 positive and negative correlations for BOD and RNO, respectively (Additional  
9 file 7). This gene set was similar to the DEGs defined by DESeq2 with the  
10 largest differences between BOD and RNO at 22°Brix. Gene set enrichment  
11 analysis of genes within the blue module having a kME of 0.80 or higher  
12 (1137 genes) revealed many common GO categories with the DEGs  
13 (Additional file 8); 71% (265 of 374) of the GO categories from the blue  
14 module subset were also found in the 625 GO categories of the DEGs (42%  
15 of total). Many GO categories were more highly enriched in the blue module  
16 (e.g. organic acid metabolic process was  $1.31\text{E}-28$  and  $1.46\text{E}-18$  for the blue  
17 module and DEGs, respectively).

18 Other enriched GO categories in the DEGs were enriched in the red  
19 subnetwork (e.g. phenylpropanoid metabolism, response to stress and  
20 defense response; Additional file 8). The WRKY75 (Vitvi01g01680) gene  
21 was the top hub gene (kME = 0.97) in this subnetwork (Additional file 6).  
22 WRKY75 is a transcription factor that positively regulates leaf senescence. It  
23 is induced by ethylene, ROS and SA and is a direct target of EIN3 [29].

24 Thus, the WGCNA results, which utilized all of the transcripts from all °Brix  
25 levels were consistent with the DESeq2 results that only compared transcript

1 abundances at 22°Brix. The WGCNA results complemented the DESeq2  
2 results by identifying hub genes and gene subnetworks, and additional  
3 transcripts and GO categories associated with the differences in transcript  
4 abundance in berry skins between BOD and RNO.

## 6 **Transcriptomic profiles dynamically changing with sugar levels**

### 7 *DEGs with largest increases in transcript abundance between sugar levels*

8 As a first approach to examining the 4445 DEG dataset, differences between  
9 the transcript abundance in berries with the lowest and highest °Brix levels at  
10 the two locations were determined (Additional file 3). Eight examples of the  
11 many DEGs with the largest transcript abundance differences from BOD  
12 (MLP43, EXL2, JMT and MYB24) and RNO (EXL2, BSMT1, HB-7, UPI, JMT,  
13 NAC073 and MYB24) were selected and are presented in Figure 1.

14 They include several transcription factors, methyl transferases, a lipid  
15 transfer protein and a protease inhibitor. The major point of showing this plot  
16 is to highlight the general trends of continuously increasing transcript  
17 abundance with sugar levels for these genes; half of these genes start at  
18 similar transcript abundance levels around 20°Brix for both BOD and RNO  
19 berries and increase in transcript abundance at a higher rate in BOD grapes  
20 as sugar levels increase. The other half increased at approximately the same  
21 rate for both locations but had higher amounts at the BOD location at the  
22 same sugar levels. These data were fitted by linear regression to compare  
23 the slopes of the lines. The slopes were significantly higher for MLP43,  
24 EXL2, JMT, and MYB24 for BOD as compared to RNO berries, but not for  
25 the other four genes (data not shown).

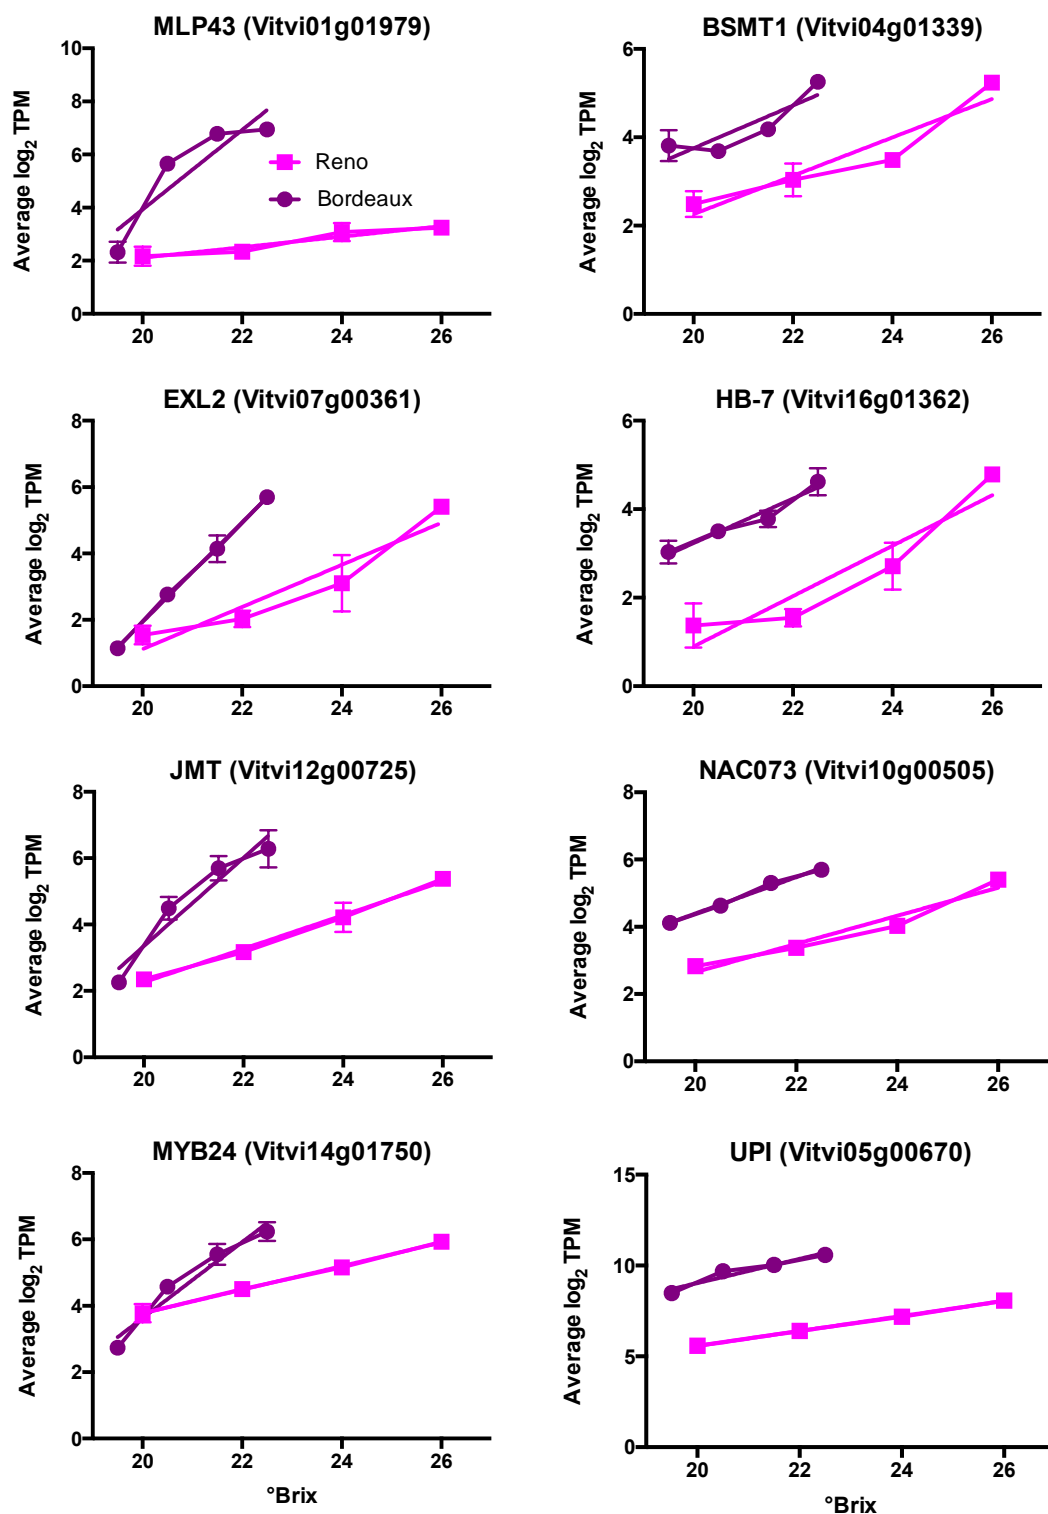

1  
2 Figure 1. Plots of the top genes from berry skins from Bordeaux and Reno with the highest  
3 increase in transcript abundance (TPM) between the lowest and highest sugar levels (°Brix).  
4 Values are the means  $\pm$  SE (n = 3). Error bars not shown are smaller than the symbol. The  
5 symbol legend is displayed in the figure. MLP43 is major lipid transfer protein 43; ERG-1 is a

1 squalene epoxidase involved in ERGosterol biosynthesis; JMT is a jasmonate o-  
 2 methyltransferase; MYB24 is a protein with a MYB domain; BSMT1 is a salicylate/benzoate  
 3 carboxyl methyltransferase; HB-7 is a homeobox protein with a HB domain; NAC073 is a  
 4 NAC protein with a NAC domain; and UPI is unusual serine protease inhibitor.

5  
 6 The significantly increased rate of change for transcript abundance in the  
 7 BOD berries indicated that the berries in BOD may have ripened at a faster  
 8 rate relative to sugar level. The DEGs in Figure 1 are involved in sterol and  
 9 jasmonate biosynthesis, defense responses and transcription.

10 The gene set enrichment analysis of the top 400 DEGs with the greatest  
 11 increase in transcript abundance from the lowest sugar level to the highest  
 12 sugar level provided some crucial insights about the differences between  
 13 berries from the two locations. The top 400 DEGs for BOD berries were  
 14 highly enriched in biosynthetic processes involving amino acid and  
 15 phenylpropanoid metabolism (Additional File 9); defense responses,  
 16 response to fungus and response to ethylene stimulus were other highly  
 17 enriched categories. The top 400 DEGs for RNO berries were enriched in  
 18 response to water deprivation and response to hormone stimulus (Additional  
 19 File 10).

20  
 21 *DEGs with largest decreases in transcript abundance between sugar levels*  
 22 Eight examples of DEGs with the greatest decrease in transcript abundance  
 23 with increasing sugar levels are presented in Figure 2. They include lipid and  
 24 cell wall proteins (e.g. expansin, protease inhibitor, wax synthase and lipid  
 25 transferase proteins) and an aquaporin (GAMMA-TIP). The data were fitted

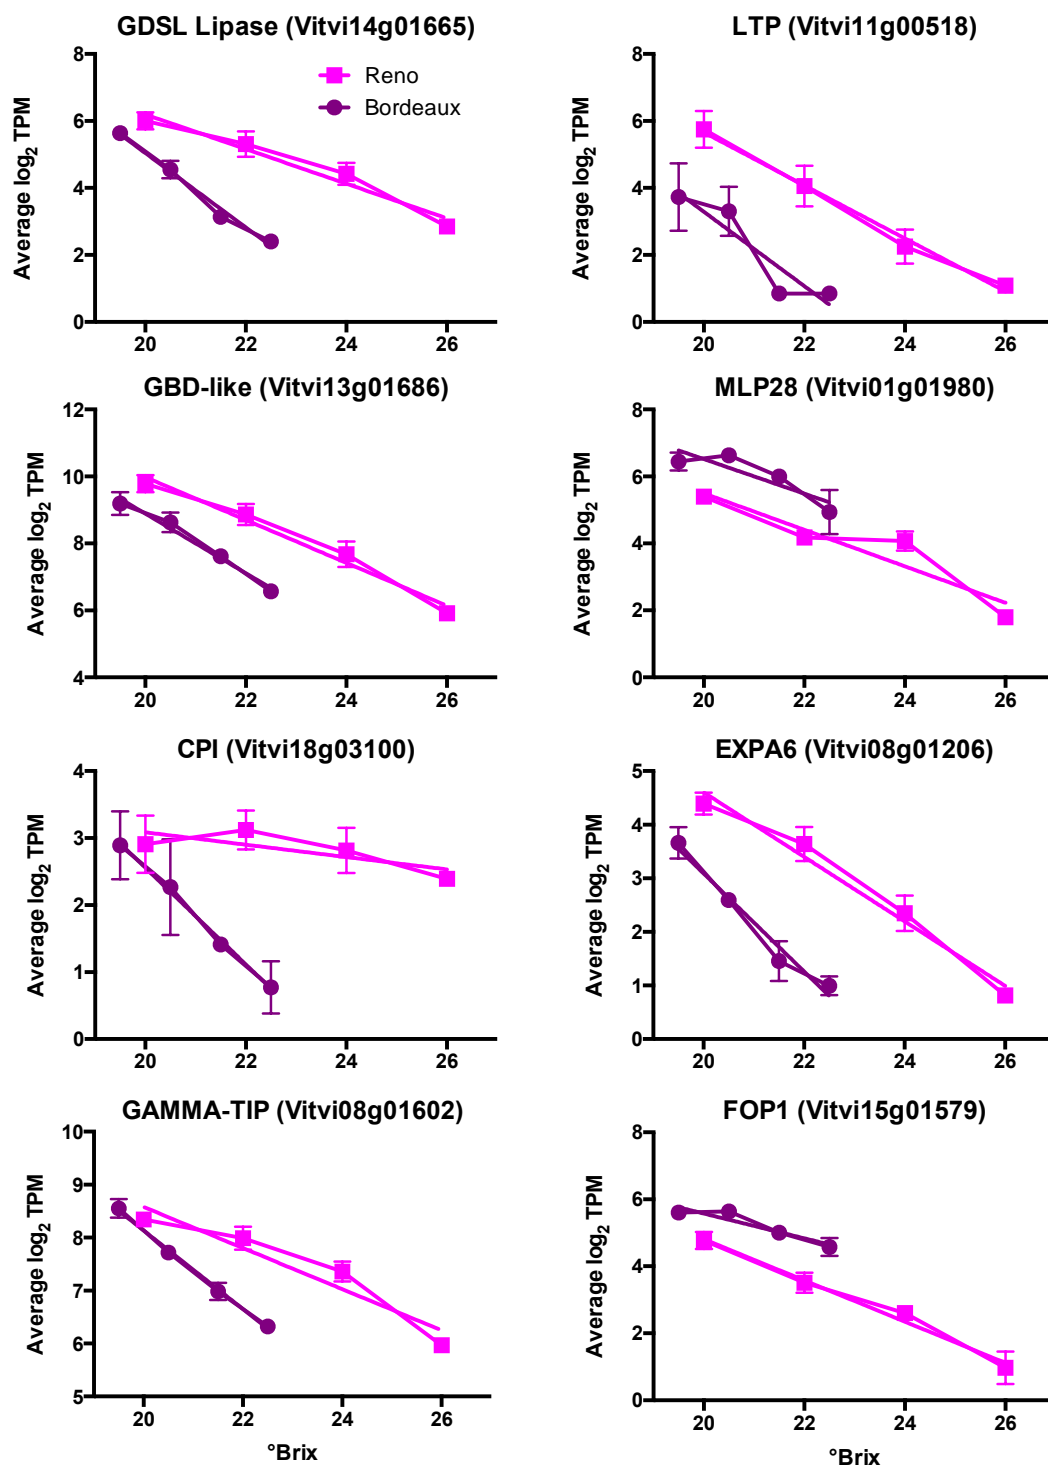

1  
2 **Figure 2.** Plots of the top genes from berry skins from Bordeaux and Reno with the highest  
3 decrease in transcript abundance (TPM) between the lowest and highest sugar levels  
4 (°Brix). Values are the means  $\pm$  SE (n = 3). Error bars not shown are smaller than the  
5 symbol. The symbol legend is displayed in the figure. GDSL is a sequence motif; GBD is a

1 galactose binding domain; CPI is cysteine protease inhibitor; GAMMA-TIP is a tonoplast  
2 intrinsic protein; LTP is a lipid transfer protein; MLP28 is a major latex protein; FOP1 is a  
3 bifunctional wax ester synthase/diacylglycerol acyltransferase; and EXPA6 is an expansin  
4 protein.

5  
6 to linear regressions and the slopes statistically compared between BOD and  
7 RNO berries. In some cases, the slopes of the linear regression lines of the  
8 DEGs were not statistically different (LTP, MLP28, GBD-like and FOP1); in  
9 other cases, there are similar amounts of transcript abundance around  
10 20°Brix, but there are significantly different slopes (GDSL Lipase, CPI,  
11 GAMMA-TIP, and EXPA6). Again, there is a trend for the transcript  
12 abundance of many of these genes to change more significantly in BOD  
13 berries than RNO berries relative to sugar level.

#### 14 15 *Differences in autophagy genes between BOD and RNO*

16 Berry ripening is a degradative process involving autophagy. As a general  
17 rule, the transcript abundance of genes involved in autophagy increased with  
18 sugar level and had a higher transcript abundance in BOD berries relative to  
19 RNO berries at the same sugar level (Fig. 3), supporting the hypothesis that  
20 BOD berries ripened faster than RNO berries relative to sugar level. In  
21 addition, the transcript abundance of a NAC6 transcription factor  
22 (Vitvi14g01985), whose ortholog in arabidopsis positively regulates aging-  
23 induced cell death and senescence in leaves [30, 31], was twice as high in  
24 BOD berries at 22°Brix (log2 value of 4.5 vs 3.5 in RNO berries).

25

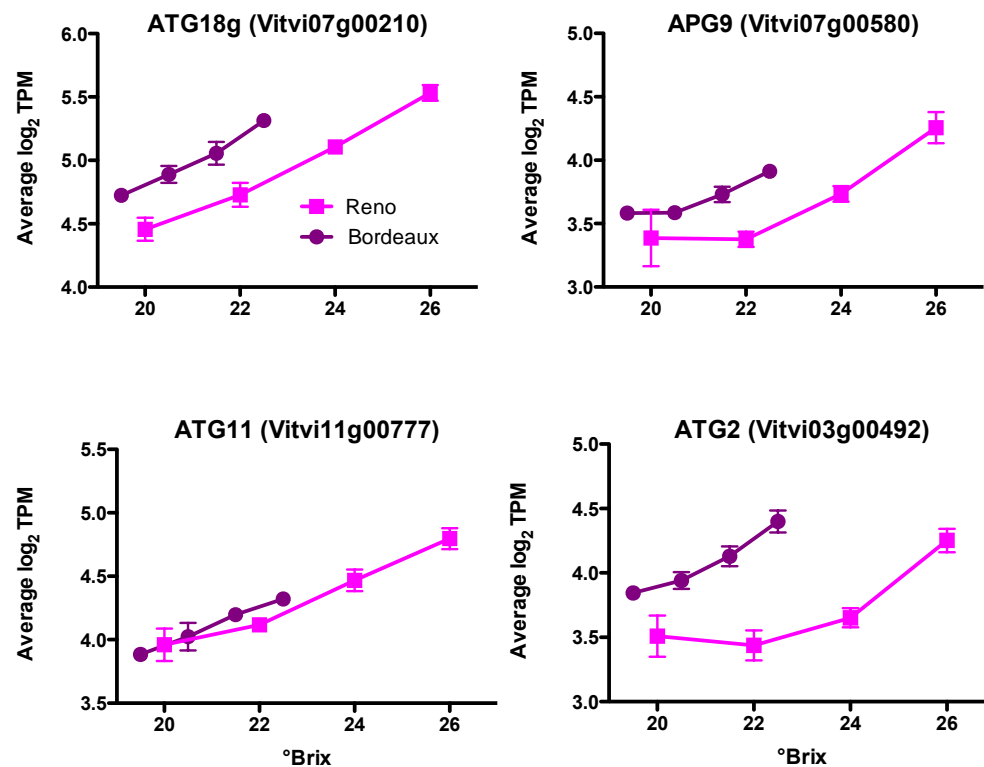

**Figure 3.** The transcript abundance of some autophagy-related (ATG) genes. Data shown are the means  $\pm$  SE; n = 3. Error bars not shown are smaller than the symbol. The symbol legend is displayed in the figure. APG9 is Autophagy 9.

### ***Aroma- and flavor-associated DEGs***

Many aroma and flavor-associated compounds are synthesized in the late stages of berry ripening and sensitive to the environment. The major metabolic pathways affecting flavor and aromas in grapes and wines include the terpenoid, carotenoid, amino acid, and phenylpropanoid pathways [6]. These pathways were identified by topGO to be highly enriched in the DEGs and/or the blue module. Some of the DEGs are involved in these pathways and will be presented in the following subsections.



# 1 *Terpene synthase genes with the greatest transcript abundance differences* 2 *between BOD and RNO*

3 Cultivar differences in berries are often ascribed to differences in aroma  
4 compounds. One of the main classes of cultivar specific aroma compounds  
5 is the terpene group [32]. The transcript abundance of a number of terpene  
6 synthases were higher in BOD berries as compared to RNO berries (Fig. 4).  
7 All but one of these (terpene synthase 55; TPS55) increased in transcript  
8 abundance with increasing sugar levels. TPS35 is a  $\beta$ -ocimine synthase ( $\beta$ -  
9 ocimine is a main component of snapdragon flower aroma [33]). TPS 26 is a  
10 Cubebol/ $\delta$ -Cadinene synthase, TPS 4 and 10 are (E)- $\alpha$ -bergamotene  
11 synthases, and TPS 07, 14 and 28 are germacrene-D synthases; these  
12 enzymes produce sesquiterpenes found in essential plant oils (see [32] and  
13 references therein for the function of all of these terpenoid genes). TPS55 is  
14 a linalool/nerolidol synthase which synthesizes acyclic terpene alcohols;  
15 linalool contributes significantly to the floral aromas of grape berries and  
16 wines. TPS68 is a copalyl diphosphate synthase involved in diterpenoid  
17 biosynthesis and TPS69 is an ent-kaurene synthase. Both TPS68 and 69 are  
18 diterpene synthases and are part of the ent-kaurene biosynthesis pathway.

19

## 20 *Other terpenoid and carotenoid metabolism-related genes*

21 Carotenoid metabolism is another biosynthetic pathway that contributes to  
22 flavor and aroma in grapes [34]. There are a number of key genes that  
23 contribute to terpenoid and carotenoid metabolism that have a higher  
24 transcript abundance (Additional file 3) in BOD berries as compared to RNO  
25 berries. For example, DXR (1-deoxy-D-xylulose 5-phosphate

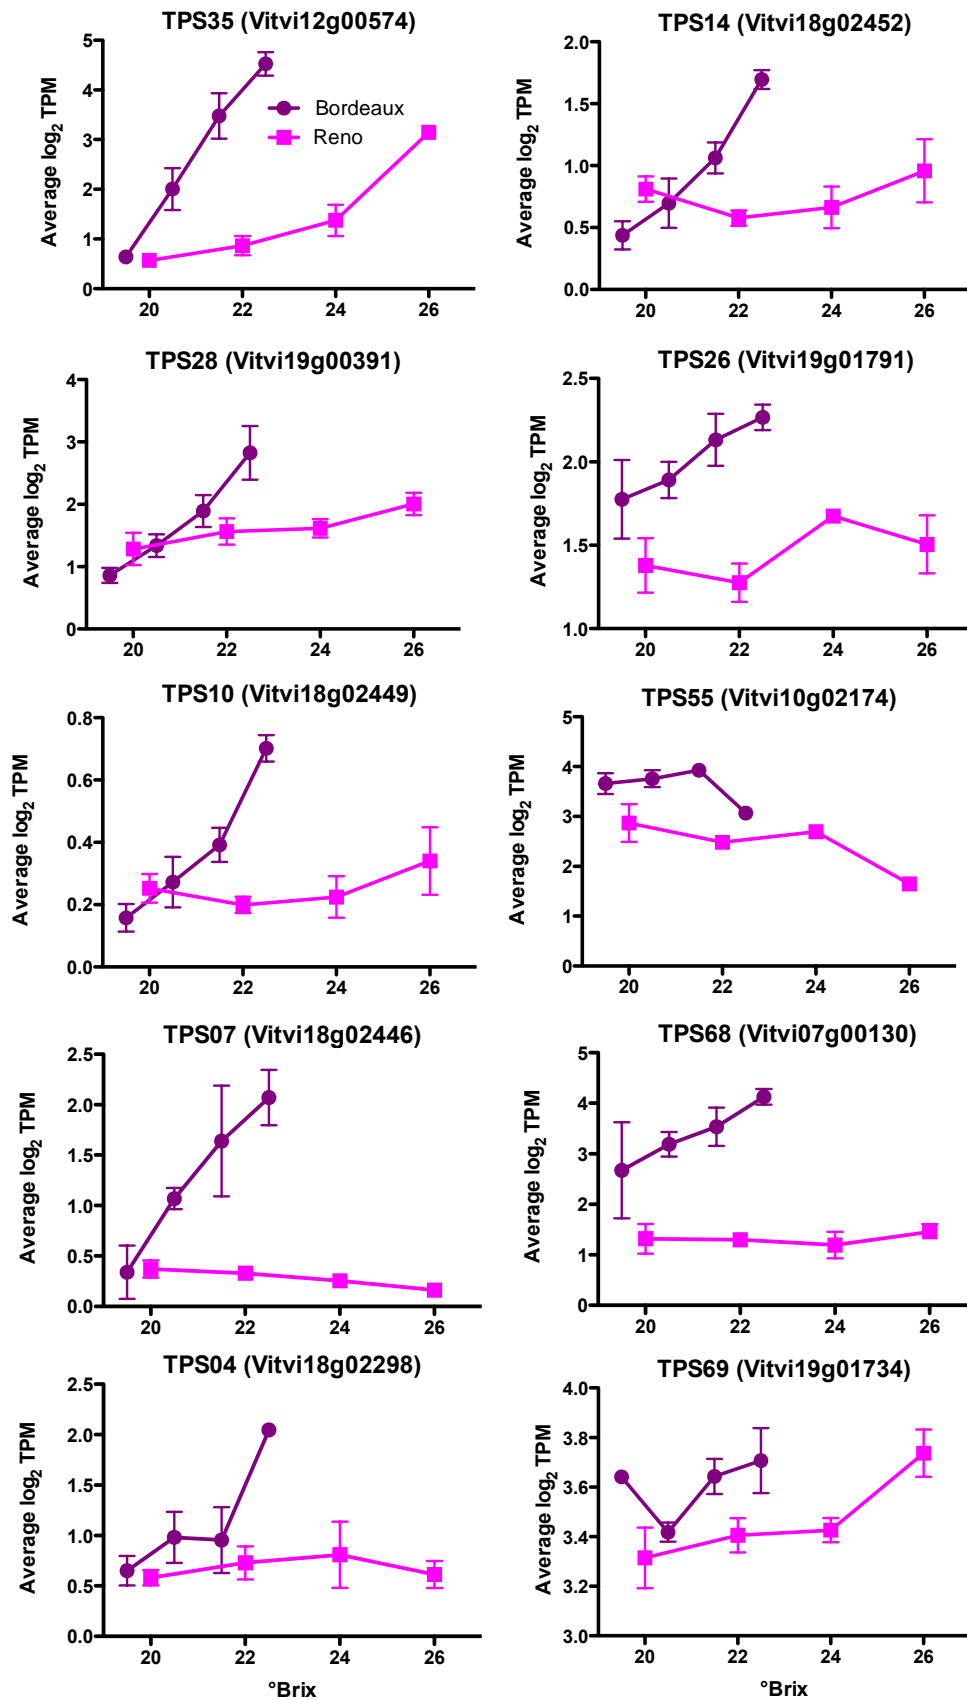

1 **Figure 4.** Expression profiles of some terpene synthase (TPS) genes. Data shown are the  
2 means  $\pm$  SE; n = 3. Error bars not shown are smaller than the symbol. The symbol legend is  
3 displayed in the figure.

4  
5 reductoisomerase, Vitvi17g00816) catalyzes the first committed step and  
6 HDS (4-hydroxy-3-methylbut-2-en-1-yl diphosphate synthase;  
7 Vitvi06g00286) enzyme controls the penultimate steps of the biosynthesis of  
8 isopentenyl diphosphate (IPP) and dimethylallyl diphosphate (DMAPP) via  
9 the methylerythritol 4-phosphate (MEP) pathway. Another example is PSY  
10 (Vitvi04g02011) that encodes phytoene synthase; PSY is the rate-limiting  
11 enzyme in the carotenoid biosynthetic pathway.

#### 12 13 *Amino acid and phenylpropanoid metabolism genes*

14 Amino acids contribute to the aroma and flavor of grapes and wines [7]. The  
15 amino acid metabolism functional GO category is highly enriched in the  
16 group of DEGs between BOD and RNO (Additional file 4) and more  
17 specifically in the top 400 BOD DEGs (Additional file 9). Some examples of  
18 genes involved in amino acid metabolism that have a higher transcript  
19 abundance in BOD berries (see Fig. 5) are phenylalanine ammonia lyase 4  
20 (*PAL4*, Vitvi16g00054 and 9 other paralogs), which catalyzes the first step in  
21 phenylpropanoid biosynthesis, branched-chain-amino-acid aminotransferase  
22 3 (*BCAT3*, Vitvi00g00789), which is involved in isoleucine, leucine and valine  
23 biosynthesis, 3-deoxy-D-arabino-heptulosonate 7-phosphate synthase 1  
24 (*DHS1*, Vitvi07g03049), which catalyzes the first committed step in aromatic  
25 amino acid biosynthesis), and tyrosine aminotransferase 7 (*TAT7*;

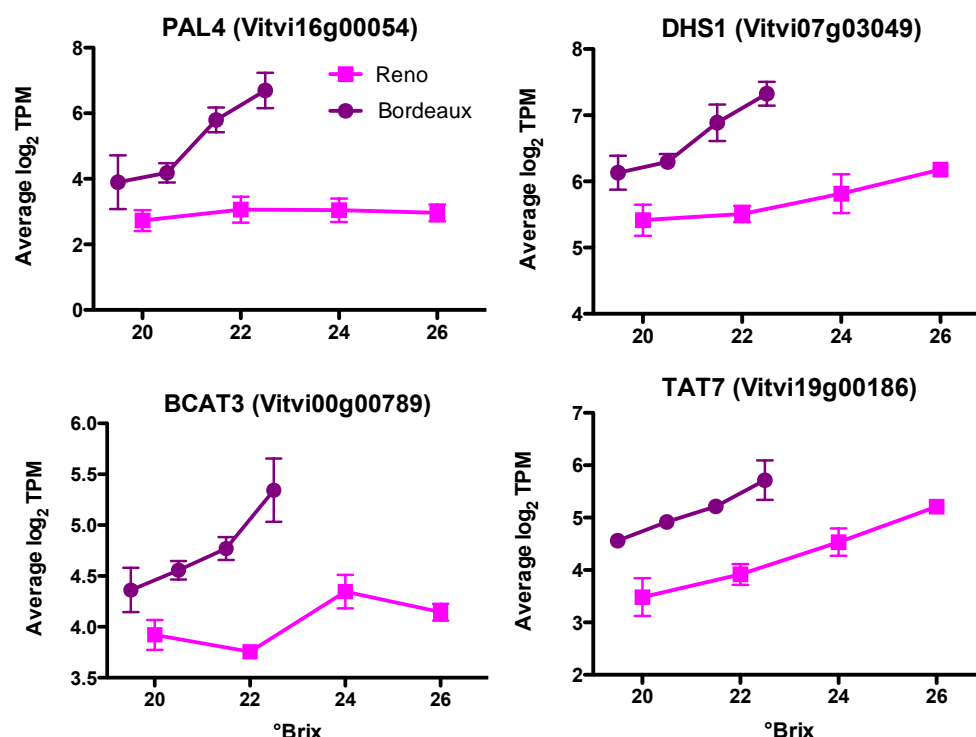

**Figure 5.** The transcript abundance of some DEGs that are involved in the amino acid metabolism. Data shown are the means  $\pm$  SE;  $n = 3$ . Error bars not shown are smaller than the symbol. The symbol legend is displayed in the figure. PAL4 is a phenylalanine ammonia lyase; DHS1 is a 3-deoxy-D-arabino-heptulosonate 7-phosphate synthase; BCAT3 is a branched-chain-amino-acid aminotransferase; and TAT7 is a tyrosine aminotransferase. Vitvi19g00186), which is involved in tyrosine and phenylalanine metabolism. Included in this group was a large number of stilbene synthases (STS), which are part of the phenylpropanoid pathway; these STSs had a higher transcript abundance in BOD berries as compared to RNO berries, with very similar transcript abundance profiles to PAL4 (see Additional file 11 for examples).

# 1 ***DEGs associated with abiotic stimuli***

## 2 *Light-responsive genes*

3 In a previous analysis, WGCNA defined a circadian clock subnetwork that  
 4 was highly connected to transcript abundance profiles in late ripening  
 5 grapevine berries [4]. To compare the response of the circadian clock in the  
 6 two different locations, we plotted all of the genes of the model made earlier  
 7 [4]. Most core clock genes (Additional file 12) and light sensing and  
 8 peripheral clock genes (Additional file 13) had significantly different transcript  
 9 abundance in BOD berries than that in RNO berries at the same sugar level  
 10 (profiles bracketed in a red box). All but one of these (PHYC) had higher  
 11 transcript abundance in BOD berries relative to RNO berries. The transcript  
 12 abundance of other genes had nearly identical profiles (not bracketed in a  
 13 red box). These data are summarized in a simplified clock model (Fig. 6),  
 14 which integrates PHYB as a key photoreceptor and temperature sensor [35,  
 15 36] that can regulate the entrainment and rhythmicity of the core circadian  
 16 clock, although to be clear it is the protein activity of PHYB, not the transcript  
 17 abundance that is regulating the clock.

## 18 19 *Chilling-responsive genes*

20 Temperatures were colder in Reno than BOD, reaching chilling temperatures  
 21 in the early morning hours. A number of previously identified chilling-  
 22 responsive genes [37] in Cabernet Sauvignon had a higher transcript  
 23 abundance in RNO berries as compared to BOD berries (Fig. 7). These  
 24 genes included *CBF1* (previously named CBF4, but renamed to be  
 25 consistent with the ortholog of arabidopsis), a transcription factor that

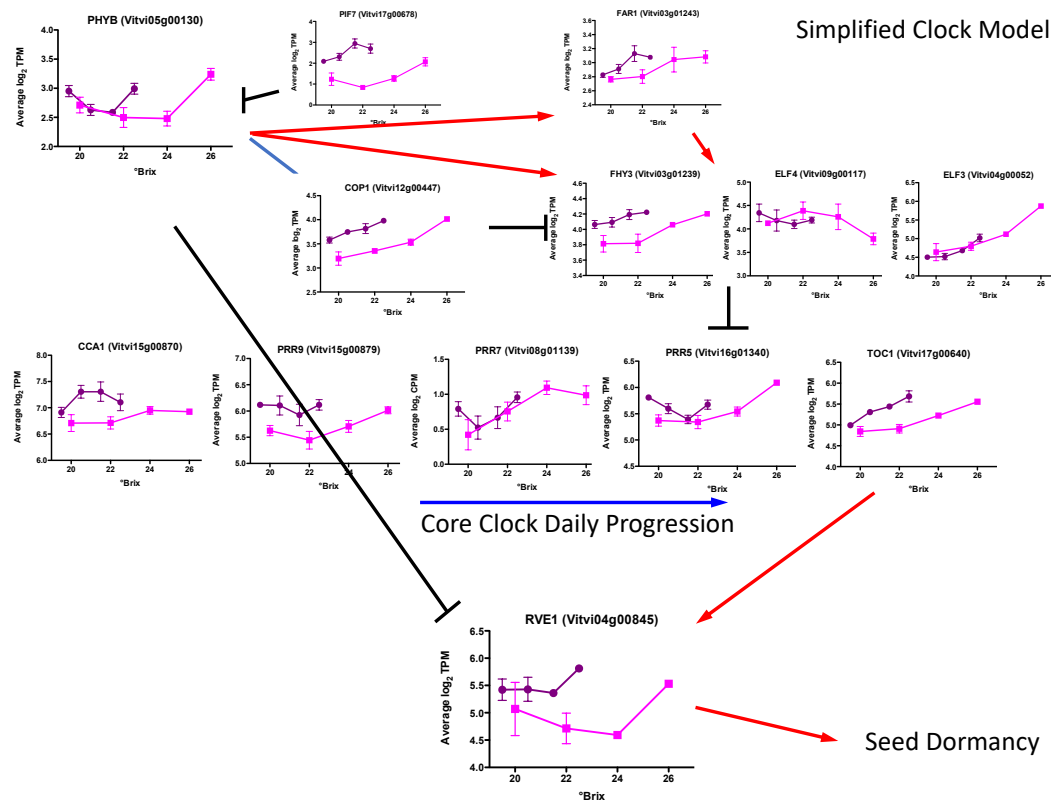

**Figure 6.** A simplified model of the core circadian clock genes. Black lines and bars represent known inhibitory reactions, red arrows indicate known stimulatory reactions, and blue lines represent known physical interactions. PHYB is phytochrome B; PIF7 is Phytochrome Interacting Factor 7; COP1 is Constitutive Photomorphogenic 1; FAR1 is Far-Red Impaired Response 1; FHY3 is Far Red Elongated Hypocotyl 3; ELF4 is Early Flowering 4; ELF3 is Early Flowering 3; CCA1 is Circadian Clock Associated 1; PRR9 is Psuedo-Response Related 9; PRR7 is Psuedo-Response Related 7; PRR5 is Psuedo-Response Related 5; TOC1 is Timing of CAB expression 1; and RVE1 is Reveille 1. *ERF6L1* (named *ERF4* in earlier grape annotations), an AP2/ERF domain transcription factor, *CML41*, that encodes a calmodulin-like protein, *XTH23*, that encodes a xyloglucan endotransglucosylase/hydrolase that is a cell wall loosening enzyme, *SULTR3;4*, a sulfate transporter, and *TPPD*, a trehalose phosphate

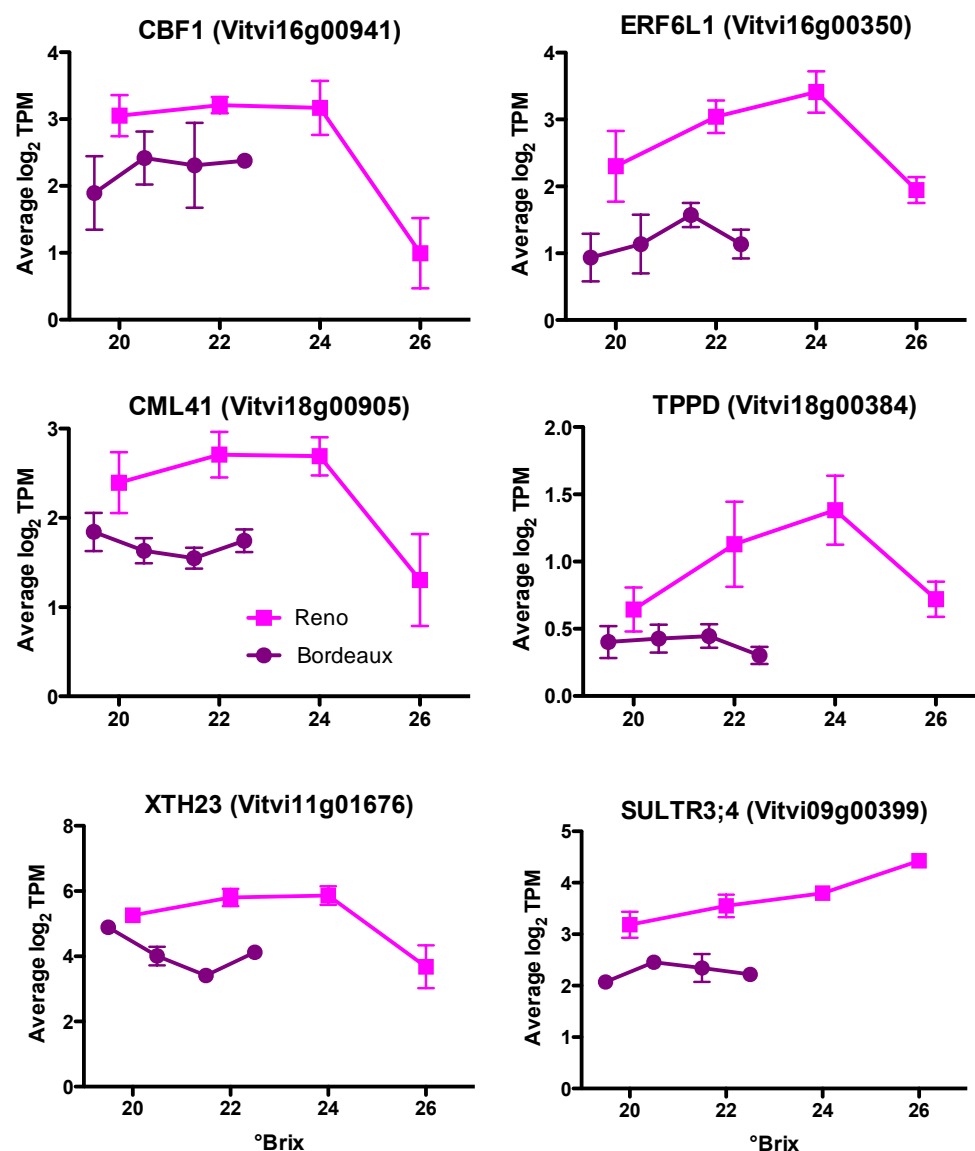

1

2 **Figure 7.** Transcript profiles of some cold responsive genes. Data shown are the means  $\pm$   
3 SE; n = 3. Error bars not shown are smaller than the symbol. The symbol legend is  
4 displayed in the figure. CBF1 is C-Repeat Binding Factor 1; ERF6L1 is Ethylene Response  
5 Factor 6-like 1; CML41 is Calmodulin 41; TPPD is Trehalose 6-Phosphate Phosphatase D;  
6 XTH23 is Xyloglucan Endotransglucosylase/Hydrolase 23 and SUFTR3;4 is Sulfate  
7 Transporter 3;4.

8

9 phosphatase, identified as a chilling-sensitive gene in grapevine involved in  
10 trehalose metabolism [39]; trehalose 6-phosphate is a signaling molecule in

1 plants that has diverse roles in developmental programs, sugar regulation  
2 and abiotic stress tolerance, including temperature stress [40].

3

#### 4 **DEGs associated with biotic stimuli**

5 The top DEGs in BOD berries were highly enriched in biotic stimuli genes.

6 Some of these genes included pathogenesis proteins (PR); these genes had

7 higher transcript abundance in BOD berry skins relative to RNO berries (Fig.

8 8).

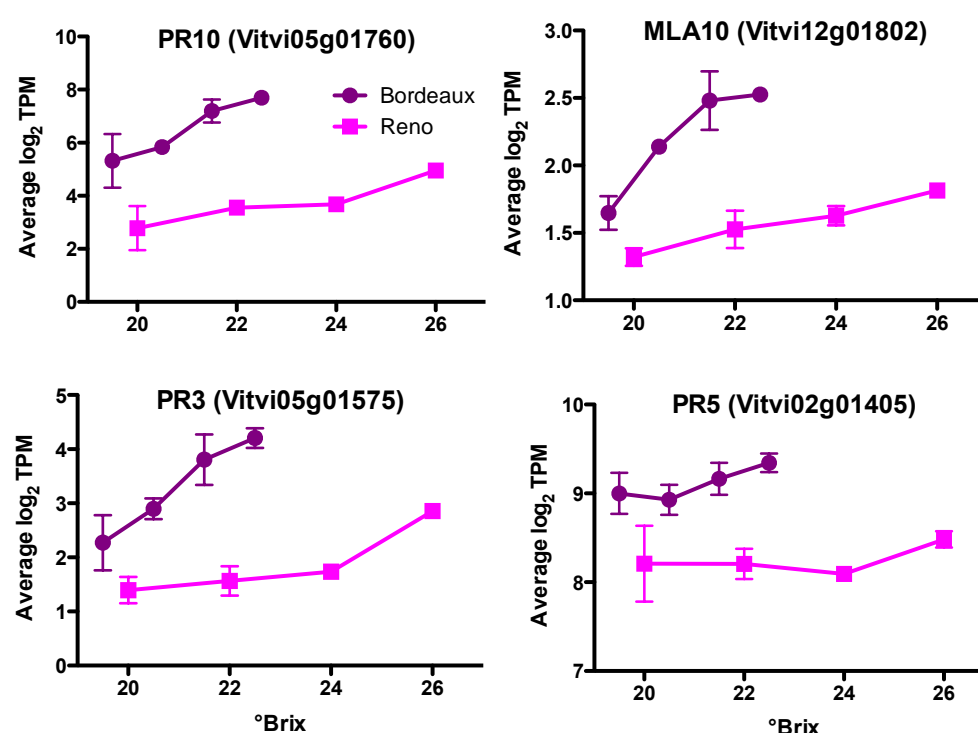

9

10 **Figure 8.** Expression profiles of pathogenesis proteins (PR) involved with powdery mildew.

11 Data shown are the means  $\pm$  SE; n = 3. Error bars not shown are smaller than the symbol.

12 The symbol legend is displayed in the figure. MLA10 is Intracellular Mildew A 10.

13

14 The transcript abundance of PR10 increased with the sugar level. PR10

15 transcript abundance increases in response to powdery mildew (*Erysiphe*



1 *necator*) inoculation in Cabernet Sauvignon leaves [41]; Vitvi05g01760  
2 corresponds to the 1610704\_at Affymetrix probe set in the VV12 experiment  
3 in PlexDB (plexdb.org). Furthermore, many other genes induced by powdery  
4 mildew were also at much higher transcript abundance levels in BOD  
5 berries. These included a PR3 protein that is a class IV chitinase, a  
6 thaumatin-like protein (PR5) and a number of the stilbene synthases  
7 mentioned in the phenylpropanoid metabolism section above (Additional file  
8 11). MLA10 (Vitvi12g01802; Affymetrix probe set 1615715\_at in [41])  
9 matches to a fungal protein from *E. necator* and was used as a control probe  
10 set for the presence of powdery mildew [41]. Vitvi12g01802 had a much  
11 higher transcript abundance in BOD berries than that in RNO berries. These  
12 data indicate that powdery mildew infection may have been higher in BOD  
13 berries and that this infection may induce some of the phenylpropanoid  
14 pathway as well.

## 16 ***DEGs associated with hormonal stimuli***

### 17 *Auxin signaling genes*

18 Auxin transport (31 genes; 1.96E-04) and cellular response to auxin stimulus  
19 (47 genes, 3.09E-04) were highly enriched GO categories for the DEGs  
20 (Additional file 4). Auxin is known to have multiple effects on grape berry  
21 ripening [42, 43]. Auxin can delay berry ripening at the veraison stage, which  
22 is at the beginning of berry ripening. Some auxin metabolism (*GH3.1*) and  
23 signaling genes such as *ABF5*, *IAA13*, *IAA15*, *IAA27*, and *ARF5* had a  
24 higher transcript abundance in RNO berries (Additional file 3). Other auxin  
25 metabolism (*GH3.6*, *JAR1*) and auxin signaling genes had a higher transcript

1 abundance in BOD including *ARF2*, *ARF8*, *ARF10*, *ARF11*, *IAA1*, *IAA10*,  
2 *IAA16*, *ARAC1* (auxin-induced proteolysis), and *GID1B*, a gibberellin  
3 receptor (Additional file 3).

4

#### 5 *ABA metabolism and signaling genes*

6 ABA is a stress hormone that responds to water deficits in grapevine [44]. A  
7 number of ABA-related genes are differentially expressed in berry skins  
8 between the two locations (Additional file 14). *NCED3.1* and *NCED3.2*  
9 (previously described as *NCED3* and *NCED5*, respectively), which are  
10 responsive to water deficit [45, 46], had higher transcript abundance in RNO  
11 and *NCED6*, which is highly expressed in embryos [45], had higher transcript  
12 abundance in BOD. *NCED6*, but not *NCED3* is involved in seed ABA and  
13 seed dormancy [46]. Additionally a number of other genes involved in the  
14 ABA signaling pathway had higher transcript abundance including some  
15 ABF, bZIP and MYB transcription factors and kinases identified to be in the  
16 ABA signaling pathway [47, 48]. Interestingly, BAM1 (Barley Any Meristem 1)  
17 was identified to be the receptor to a root signaling peptide hormone  
18 (CLE25) that responds to water deficit and upregulates *NCED3* transcript  
19 abundance in arabidopsis leaves [49]. The transcript abundance of BAM1  
20 was higher in RNO berries than that of BOD berries (Additional File 14).  
21 There were no differences in the transcript abundance of CLE25 (data not  
22 shown).

23

#### 24 *Ethylene signaling genes higher in BOD*

1 There were 72 DEGs that were enriched in the response to ethylene GO  
 2 category (Additional file 4). Ethylene is a stress hormone that responds to  
 3 many types of biotic [50] and abiotic [51] stresses in addition to its role in fruit  
 4 development and ripening [52]. Many ethylene-related genes had a higher  
 5 transcript abundance in BOD berries. These included ethylene biosynthesis,  
 6 ethylene receptors and ERF transcription factors (Fig. 9). ERF1 and ERF2  
 7 are at the beginning of the ethylene signaling pathway and are direct targets  
 8 of EIN3 [48, 53]. Other ERF transcription factors (e.g. ERF98 and ERF59)  
 9 identified as hubs in the ethylene signaling pathway in arabidopsis leaves  
 10 [54] were also differentially expressed in a similar manner as ERF1 and  
 11 ERF2 between the two locations (data not shown).

### 13 ***DEGs associated with mineral nutrients***

#### 14 *Iron homeostasis genes*

15 Nineteen DEGs were associated with genes enriched in iron homeostasis  
 16 (Additional file 4); five of these DEGs, *NRAMP2* (Vitvi18g00695), *SIA1*  
 17 (Vitvi12g02500), *VIT1* (Vitvi01g00512), *FER4* (Vitvi08g00763) and *ABS4*  
 18 (Vitvi18g00583) were in the top 400 DEGs in RNO berries. Only *VIT1* was in  
 19 the top 400 DEGs for BOD berries. Nine examples of DEGs involved in iron  
 20 homeostasis are shown in Figure 10. Iron homeostasis genes *VIT1*, *IREG3*,  
 21 and *ATH13* have higher transcript abundance in BOD berries than in RNO  
 22 berries. Iron homeostasis genes *SIA1*, *YSL3*, *FER4*, *FER2*, and *ABS4* had  
 23 higher transcript abundance in RNO berries compared to BOD berries.  
 24 Average available iron soil concentrations were about 5 times higher in the  
 25 BOD vineyard soil compared to the RNO vineyard soil (Table 1).

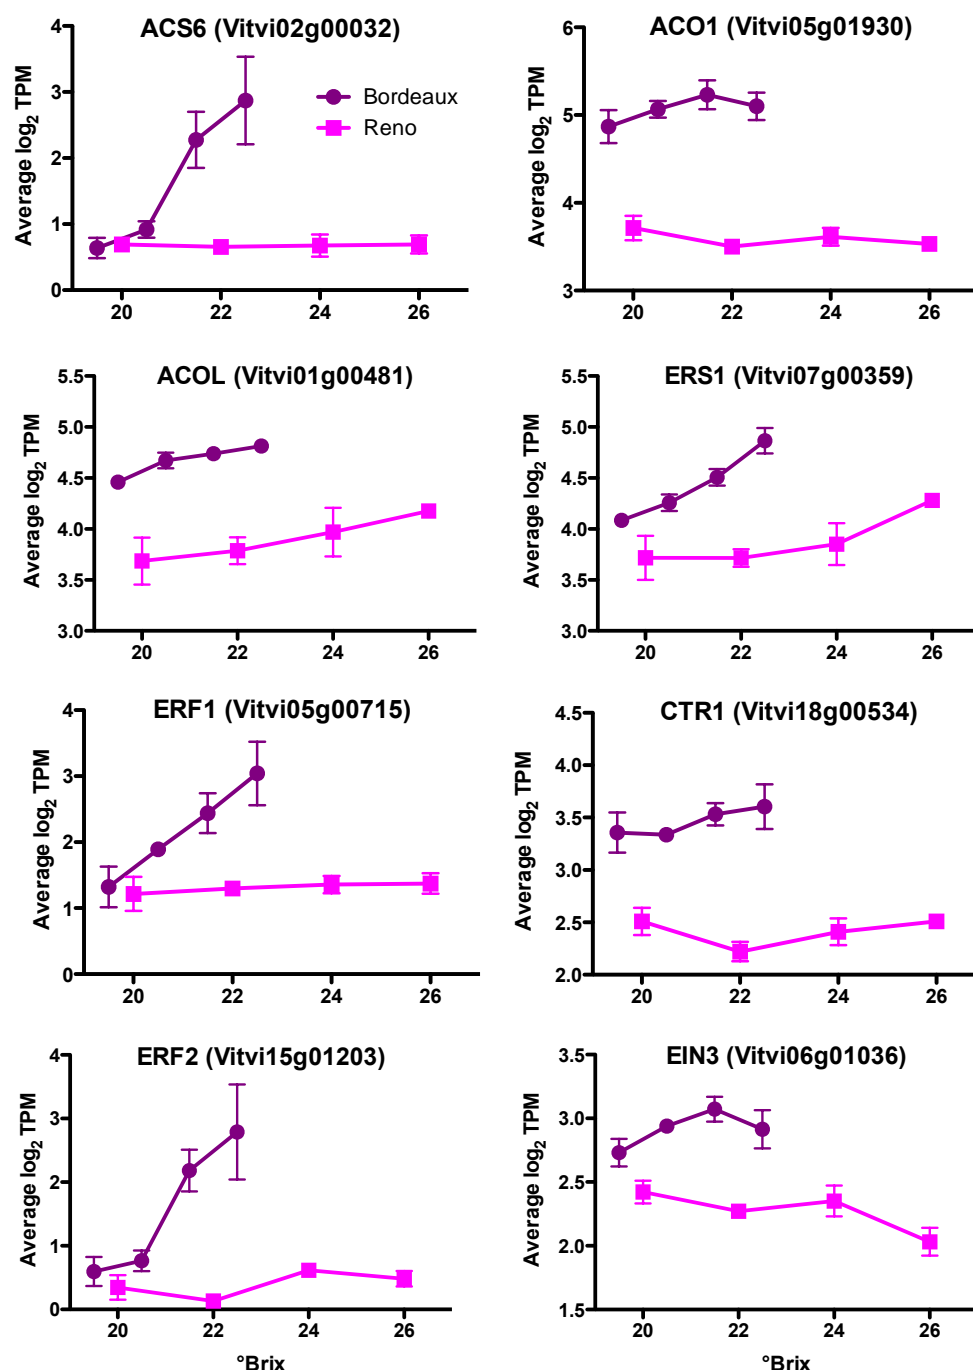

1  
2 **Figure 9.** The transcript abundance of DEGs involved with ethylene metabolism and  
3 signaling. Data shown are the means  $\pm$  SE; n = 3. Error bars not shown are smaller than the  
4 symbol. The symbol legend is displayed in the figure. ACS6 is 1-Aminocyclopropane-1-  
5 Carboxylic Acid (ACC) Synthase 6; ACO1 is ACC Oxidase 1; ACOL is ACC Oxidase-Like;  
6 ERS1 is Ethylene Response Sensor 1; CTR1 is Constitutive Triple Response 1, EIN3 is

1 Ethylene-Insensitive 3; and ERF1 and ERF2 are Ethylene Response Factors 1 and 2.  
2

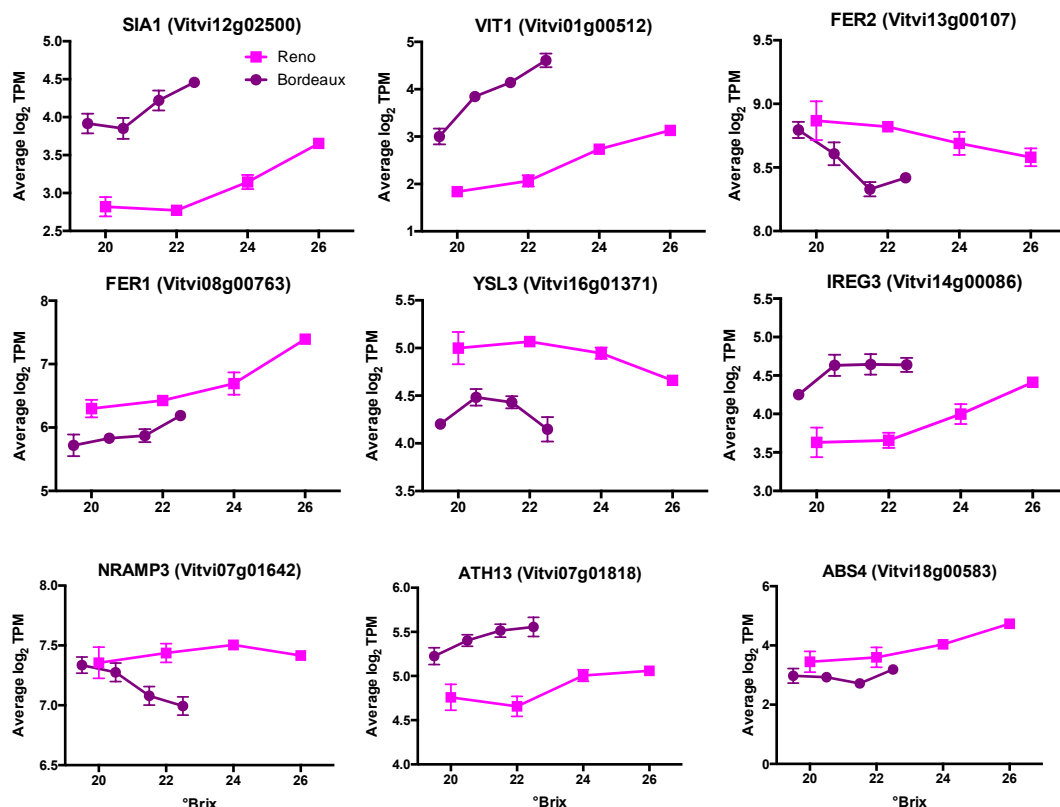

3  
4 **Figure 10.** Expression profiles of DEGs involved in iron homeostasis. Data shown are the  
5 means  $\pm$  SE; n = 3. Error bars not shown are smaller than the symbol. The symbol legend is  
6 displayed in the figure. SIA1 is Salt-Induced ABC1 Kinase 1; VIT1 is Vacuolar Iron  
7 Transporter 1; FER2 and 4 are Ferritin 2 and 4; YSL3 is Yellow Stripe-like 3; IREG3 is Iron-  
8 Regulated Protein 3; NRAMP3 is Natural Resistance-Associated Macrophage Protein 3;  
9 ATH13 is ABC2 homolog 13; and ABS4 is Abnormal Shoot 4.

## 11 Discussion

12 The common gene sets for both locations represented approximately 20% of  
13 the genes expressed. The processes involved included the increase of  
14 catabolism and the decline of translation and photosynthesis. It is clear that  
15 these processes play important roles in berry ripening. Most transcript

1 abundances varied with increasing sugar levels and berry maturation and  
2 most of these varied with the vineyard site. Many of the DEGs were enriched  
3 with gene ontologies associated with environmental or hormonal stimuli.  
4  
5 *DEG expression profiles of grape berry skins were associated with*  
6 *environmental factors and seed development*  
7 Plants are exposed to a multitude of factors that influence their physiology  
8 even in controlled agricultural fields such as vineyards. The vineyards in  
9 BOD and RNO are exposed to very different environments; these  
10 environmental influences were reflected in some of the DEG gene sets with  
11 enriched gene ontologies. Our data support the hypothesis that  
12 transcriptomic dynamics in the late stages of berry ripening are sensitive to  
13 local environmental influences on the grapevine.  
14 While most transcript abundances in berries are largely influenced by  
15 genetics or genotype, environment also plays a large role [2].  
16 It is impossible with the experimental design of this study to determine the  
17 amount that each of the environmental factors contributed to the amount of  
18 differential expression in these two locations. There are too many variables  
19 and too many potential interactions to determine anything conclusively. All  
20 we can say is that these genes are differentially expressed between the two  
21 locations, which are likely due to known and unknown factors (a sense of  
22 place or terroir).  
23 In this study we compared two different clones of Cabernet Sauvignon, one  
24 on rootstock and the other on its own roots. There are likely to be some  
25 effects on the transcript abundance in the berries between these grapevines

1 as a result of the genetic differences between their roots and their clonal  
2 shoots/scions. Not knowing what these genes might be from previous  
3 studies prevents us from drawing any clues. These and other factors most  
4 certainly affect the berries to some degree. However, our data indicate that  
5 grape berry skins also were responsive to a multitude of potential  
6 environmental factors in the two vineyard locations and possibly from signals  
7 coming from the maturing seed. We say potential environmental factors  
8 because we did not control for these factors; we associated transcript  
9 abundance with the factors that were different in the two locations. The  
10 transcript abundance profiles along with functional annotation of the genes  
11 gave us clues to factors that were influencing the berries and then  
12 associations were made with the known environmental variables. Further  
13 experiments are required to follow up on these observations.  
14 The environmental factors that we were able to associate with differences in  
15 transcript abundance (DEGs) between the two locations included air  
16 temperatures, light, moisture (rainfall and relative humidity) and biotic stress.  
17 These factors in turn were associated with transcript abundance involved  
18 with physiological responses and berry traits such as seed and embryo  
19 development, hormone signaling (ABA, ethylene and auxin),  
20 phenylpropanoid metabolism, and the circadian clock. In the following  
21 sections we discuss in more detail some of the possible environmental  
22 factors that were reflected in the enriched gene ontologies found in the gene  
23 sets from this study.  
24  
25 *Transcript abundance of light-responsive genes*

1 Light regulates the transcript abundance of many genes in plants. It has  
2 been estimated that 20% of the plant transcriptome is regulated by white  
3 light and this includes genes from most metabolic pathways [55]. Light is  
4 sensed by a variety of photoreceptors in plants [36]; there are red/far red,  
5 blue and UV light receptors. PHYB is a key light sensor, regulating most of  
6 the light sensitive genes [56] and sensing the environment through red light  
7 to far-red light ratios and temperature [36, 57]. PHYB entrains the circadian  
8 clock affecting the rate of the daily cycle [58] and the expression of many the  
9 circadian clock genes [56]; PHYB induces morning phase genes and  
10 represses evening phase genes. Other photoreceptors can entrain the  
11 circadian clock as well [36].

12 PHYB and the circadian clock are central regulators of many aspects of plant  
13 development including seed germination, seedling growth, and flowering [36,  
14 58, 59]. The circadian clock influences the daily transcript abundance of  
15 genes involved in photosynthesis, sugar transport and metabolism, biotic  
16 and abiotic stress, even iron homeostasis [58].

17 Light signaling was very dynamic in the berry skin transcriptome in the late  
18 stages of berry ripening with a higher transcript abundance of many light  
19 signaling genes in BOD berries. Many photoreceptors that interact with the  
20 circadian clock had a higher gene expression in BOD berries. In the  
21 circadian clock model, Circadian Clock Associated 1 (*CCA1*) is an early  
22 morning gene and has its highest expression at the beginning of the day. It is  
23 at the start of the circadian core clock progression through the day, whereas  
24 the transcript abundance of Timing Of CAB Expression 1 (*TOC1*) is highest  
25 at the end of the day and finishes the core clock progression (Fig. 6). In both



1 of these cases, there is a higher transcript abundance of these genes in  
2 BOD than in RNO.

3 The evening complex is a multi-protein complex composed of Early  
4 Flowering 3 (ELF3), Early Flowering 4 (ELF4) and Phytoclock 1 (PCL1 also  
5 known as LUX) that peaks at dusk. Of the three of these proteins, ELF4 had  
6 a small difference in transcript abundance between locations around the  
7 20°Brix level (Fig. 6), whereas there was no distinction between locations or  
8 sugar levels for ELF3 (Fig. 6) or PCL1 (Additional file 12). The transcript  
9 abundance of ELF3 increased with sugar level and shortening of the day  
10 length (the higher sugar level comes later in the season and thus is at a  
11 shorter day length). ELF3, as part of the evening complex (EC), has direct  
12 physical interactions with PHYB, COP1 (Constitutive Photomorphogenic 1)  
13 and TOC1 [60] linking light and temperature signaling pathways directly with  
14 the circadian clock. It is interesting that most of the components of the clock  
15 showed significant differences in transcript abundance between BOD and  
16 RNO, except for the three proteins that make up the evening clock.

17 The transcript abundance profile of PHYB was similar in both BOD and RNO  
18 berries (Fig. 6), however the changes in transcript abundance with sugar  
19 level occurred in BOD berries at a lower sugar level. There was a gradual  
20 decline of PHYB transcript abundance with increasing sugar level until the  
21 last measurement at the fully mature stage, where there was a large  
22 increase in transcript abundance. A very similar profile is observed for  
23 Reveille 1 (RVE1). RVE1 promotes seed dormancy in arabidopsis and  
24 PHYB interacts with RVE1 by inhibiting its expression [61]. PIF7  
25 (Phytochrome Interacting Factor 7), interacts directly with PHYB to suppress

1 PHYB protein levels [62]. Likewise, PIF7 activity is regulated by the circadian  
2 clock [63]. PIF7 had different transcript abundance profiles in the BOD and  
3 RNO berries. It was somewhat similar to the profiles in PHYB in RNO berries  
4 and the opposite in BOD berries, indicating a more complicated role of the  
5 transcript abundance for this protein in the two different locations. Note that  
6 transcript abundance does not necessarily infer protein abundance and so  
7 making functional associations here is not necessarily accurate. The  
8 transcript abundance of two of the other grape phytochromes (PHYA and  
9 PHYE) did not vary significantly between the two locations or at different  
10 sugar levels. PHYC had a higher transcript abundance in RNO berries and  
11 did not change much with different sugar levels. Many other light receptors  
12 (e.g. CRY3, FAR1, FRS5, etc.) had higher transcript abundance in BOD  
13 berries (Additional file 13). Thus, light sensing through the circadian clock is  
14 a complicated process with multiple inputs.

15 RVE1 follows a circadian rhythm [64]. It behaves like a morning-phased  
16 transcription factor and binds to the EE element, but it is not clear if it is  
17 affected directly from the core clock (e.g. TOC1 or EC which repress other  
18 morning gene paralogs like *CCA1* and *LHY*) or through effects of PHYB or  
19 both. PHYB downregulates RVE1; RVE1 promotes auxin concentrations and  
20 decreases gibberellin (GA) concentrations [61]. Warmer night temperatures  
21 (as in BOD) cause more rapid reversion of the active form of PHYB to the  
22 inactive form [36] and thus may promote a higher expression/activity of  
23 RVE1. Pr (phytochrome in the red form, which is the physiologically inactive  
24 form) appears to accelerate the pace of the clock [58]. It is unclear what role  
25 phytochromes might have in seed and fruit development in grapes.

1 Very little is known about the effect of PHY on fruit development in general.  
2 In one tomato study, the fruit development of *phy* mutants was accelerated  
3 [65], suggesting that PHYB as a temperature/light sensor and a regulator of  
4 the circadian clock may influence fruit development. Carotenoid  
5 concentrations, but not sugar concentrations, also were affected in these  
6 mutants.  
7 Photoperiod affects the transcript abundance of PHYA and PHYB in grape  
8 leaves [66]. In the present study, the transcript abundance of the majority of  
9 the photoreceptor genes in berry skins, including red, blue and UV light  
10 photoreceptors, had a higher transcript abundance in BOD berries  
11 (Additional file 13). It is unclear what the effect of PHYB and the circadian  
12 clock have on grape berry development. However, there are clear  
13 differences between the two locations and it seems likely that PHYB and the  
14 circadian clock are key grape berry sensors of the environment, affecting  
15 fruit development and composition.

# 16 *Transcript abundance of temperature-responsive genes*

17 The berry transcriptome is sensitive to temperature [2, 3]. Temperature  
18 related genes were differentially expressed at the two locations in our study.  
19 The RNO berries were exposed to a much larger temperature differential  
20 between day and night than BOD berries and were also exposed to chilling  
21 temperatures in the early morning hours during the late stages of berry  
22 ripening (Table 1). The transcript abundance of some cold-responsive genes  
23 was higher in RNO berry skins than in BOD berry skins, including *CBF1* and  
24 *ERF6L1*.  
25

1 CBF1 transcript abundance is very sensitive to chilling temperatures; it is a  
2 master regulator of the cold regulon and improves plant cold tolerance [38,  
3 67, 68]. PIF7 binds to the promoter of CBF1, inhibiting CBF1 transcript  
4 abundance, linking phytochrome, the circadian clock and CBF1 expression  
5 [63]. Our data are consistent with this model; transcript abundance of PIF7  
6 was higher and CBF1 transcript abundance was lower in BOD berry skins  
7 than RNO berry skins (Fig. 6 and 7).

8 The transcript abundance of *ERF6L1* was identified in another study to peak  
9 at a TSS where optimum berry flavor and ripeness occur [69]. It was  
10 hypothesized that this gene may be associated with berry ripening and the  
11 transcript abundance involved with aroma-related compounds. However, in a  
12 later study, the transcript abundance of *ERF6L1* did not peak, but steadily  
13 declined with increasing sugar levels [4]. A major difference between these  
14 two studies is that in the earlier study the berries were shipped on ice 24 h  
15 before freezing in liquid nitrogen, whereas in the latter study, berries were  
16 harvested and flash frozen immediately. Thus, the increased *ERF6L1*  
17 transcript abundance may have been responding to the chilling temperatures  
18 rather than to the sugar concentration or there was an interaction between  
19 the two factors. This chilling response may also occur during some  
20 commercial harvests, when berries are chilled down before starting  
21 fermentation. The cold-responsive transcripts identified in this study (Fig. 7)  
22 may be good markers for chilling stress since their abundance was  
23 increased by chilling temperatures in shoot tips [37], leaves [39] and berry  
24 skins (this study). We do not have an explanation for the large decrease in

1 transcript abundance for many of these genes at 26°Brix for the RNO berries  
2 (Fig. 7).

3

#### 4 *Transcript abundance of dehydration and seed dormancy genes*

5 ABA concentrations in plants increase in response to dehydration and ABA  
6 triggers a major signaling pathway involved in osmotic stress responses and  
7 seed development [70]. ABA concentrations only increase in the seed  
8 embryo near the end of seed development when the embryo dehydrates and  
9 goes into dormancy. ABA concentrations remain high to inhibit seed  
10 germination. The transcript abundance of ABA signaling genes such as  
11 ABF2 and SnRK2 kinases increase after application of ABA to cell culture  
12 [71] and in response to dehydration [48] in leaves of Cabernet Sauvignon.  
13 The data in this study are consistent with the hypothesis that BOD berries  
14 are riper at lower sugar levels. The ABA signaling genes in the berry skins  
15 had higher transcript abundance in BOD berries indicating that ABA  
16 concentrations were higher in BOD than RNO berries even though RNO  
17 berries were exposed to drier conditions (Table 1). ABA concentrations may  
18 be higher in the BOD berry skins based upon the higher transcript  
19 abundance of important ABA signaling and biosynthesis genes encoding for  
20 ABF2, SnRK2 kinases and NCED6. We hypothesize that this is seed derived  
21 ABA since water deficits were not apparent in BOD with the recent rainfall  
22 and high humidity. In contrast, *NCED3* genes had higher transcript  
23 abundance in RNO berry skins, which might occur as the result of the very  
24 low humidity and large vapor pressure deficit (the vines were irrigated). The  
25 lower expression of *NCED6* in RNO berry skins may indicate that the seeds

1 in the berry were more immature than the BOD berries. The higher  
2 expression of other seed development and dormancy genes (e.g. *RVE1*,  
3 *ARF2*, *ARF10*, etc.) in the berry skins support the argument that BOD berries  
4 (and seeds) matured at a lower sugar level than the RNO berries.

5 The ABA concentrations in the berry skins are a function of biosynthesis,  
6 catabolism, conjugation and transport. ABA in seeds increase as the seed  
7 matures and some of this ABA may be transported to the skin. In fact,  
8 *ABCG40* genes, which encode ABA transporters, had higher transcript  
9 abundance in BOD berry skins than that in RNO (Additional file 3). Part of  
10 the ABA in skins may be transported from the seed and part of it might be  
11 derived from biosynthesis in the skins. *NCED6* transcript abundance in the  
12 skins was higher in BOD berries. Perhaps the transcript abundance of  
13 *NCED6* in the skin is regulated by the same signals as the embryo and  
14 reflects an increase in seed maturity. *AtNCED6* transcript abundance is not  
15 responsive to water deficit in arabidopsis, but *AtNCED3* and *AtNCED5* are  
16 [46]. This is consistent with the higher *NCED3* and *BAM1* transcript  
17 abundance in RNO berries. Thus, there are complex responses of ABA  
18 metabolism and signaling. It would appear that there may be two different  
19 ABA pathways affecting ABA concentrations and signaling: one involved with  
20 embryo development and one involved with the water status in the skins.

21 Auxin is also involved with ABA signaling during the late stages of embryo  
22 development in the seeds. Auxin signaling responses are complex. ABF5 is  
23 an auxin receptor that degrades Aux/IAA proteins, which are repressors of  
24 ARF transcriptional activity [72]. Thus, a rise in auxin concentration releases  
25 Aux/IAA repression of ARF transcription factors, activating auxin signaling. In

1 the berry skins, there was a diversity of transcriptional responses of *Aux/IAA*  
2 and *ARF* genes in the two locations, some with increased transcript  
3 abundance and others with decreased transcript abundance. As with ABA  
4 signaling, there may be multiple auxin signaling pathways operating  
5 simultaneously.  
6 One pathway appears to involve seed dormancy. *ARF2* and *ARF10* genes  
7 had a higher transcript abundance in BOD berries. *ARF10* upregulates *ABI3*  
8 expression and promotes seed dormancy [73]; *ARF2* also promotes  
9 dormancy through the ABA signaling pathway [74]. This is consistent with  
10 the hypothesis that BOD berries reach maturity at a lower sugar level than  
11 RNO berries. Auxin may play a role in promoting seed dormancy through  
12 *ARF2* and *ARF10* effects on ABA signaling in the late stages of berry  
13 ripening.

14

#### 15 *Transcript abundance of biotic stress genes*

16 Grapevines have very dynamic gene expression responses to pathogens  
17 [75, 76]. The top 150 DEGs for BOD berries were highly enriched with biotic  
18 stress genes. The higher rainfall and high relative humidity in BOD would  
19 make moist conditions suitable for pathogenic fungi to grow. We detected a  
20 much higher transcript abundance of powdery mildew-responsive genes in  
21 BOD berries and this may be connected to a higher transcript abundance of  
22 ethylene and phenylpropanoid genes as part of a defense response. The  
23 transcript abundance profiles of some of these genes (e.g. PR10, PAL4,  
24 STS10, ACS6, and ERF2; see Figs. 4, 5, 8 and 9) are remarkably similar.



1 Increased ethylene signaling in grapevines has been associated with  
2 powdery mildew infection and phenylpropanoid metabolism and appears to  
3 provide plant protection against the fungus [77, 78]. Genes involved with  
4 phenylpropanoid metabolism, especially *PAL* and *STS* genes, appear to be  
5 quite sensitive to multiple stresses in the environment [79]. In arabidopsis  
6 there are four *PAL* genes [80]. *PAL1* and *PAL2* appear to be involved with  
7 flavonoid biosynthesis; *PAL4* provides pathogen resistance. Ten different  
8 *PAL4* orthologs had a higher transcript abundance in BOD berry skins; many  
9 *STS* genes also had a higher transcript abundance in BOD berry skins  
10 (Additional file 11). Stilbenes are phytoalexins and provide pathogen  
11 resistance in grapes and *STS* genes are strongly induced by pathogens [75].  
12 Thus, the higher transcript abundance of powdery mildew genes may be  
13 associated with the higher transcript abundance of genes in the ethylene and  
14 phenylpropanoid pathways.

#### 16 *Transcript abundance of iron homeostasis genes*

17 The transcript abundance of a number of iron homeostasis genes were  
18 significantly different in the two locations (Fig. 10) and there was a difference  
19 in soil available iron concentrations in the two locations. However, iron  
20 uptake and transport in plants is complicated depending on multiple factors,  
21 such as pH, soil redox state, organic matter composition, solubility in the  
22 phloem, etc. Thus, it is impossible to predict iron concentrations in the berry  
23 without direct measurements. The roles of these genes in iron homeostasis  
24 and plant physiological functions are diverse. Iron supply can affect  
25 anthocyanin concentrations and the transcript abundance of genes in the



1 phenylpropanoid pathway in Cabernet Sauvignon berry skins [81]. One of  
2 the DEGs, SIA1, is located in the chloroplast in arabidopsis and appears to  
3 function in plastoglobule formation and iron homeostasis signaling in concert  
4 with ATH13 (also known as OSA1) [82]. Another DEG, YSL3, is involved in  
5 Fe transport [83]. It acts in the SA signaling pathway and appears to be  
6 involved in defense responses to pathogens. It also functions in iron  
7 transport into seeds [84]. FER4 is one of a family of ferritins (iron-binding  
8 proteins) found in arabidopsis [85]. FER2 is a specific ferritin that is  
9 associated with the dry seed during fruit development [86]. It is a storage  
10 form of iron and also is involved in protection against oxidative stresses. The  
11 transcript abundance of FER2, FER3 and FER4 is induced by chilling  
12 temperatures in the light [87], but not FER1. VIT1 and NRAMP3 are vacuolar  
13 iron transporters [86] and are also involved in iron storage in seeds.  
14 Interestingly, increased *VIT1* transcript abundance leads to decreased *FER2*  
15 transcript abundance [86]. This response is consistent within the studied  
16 berries as *VIT1* transcript abundance increased with sugar level and had a  
17 higher transcript abundance in BOD berries than that of RNO berries and the  
18 transcript abundance of *FER2* declined with sugar levels in BOD berries to a  
19 lower amount than that of RNO berries.  
20 Other DEGs are also responsive to iron supply. IREG3 (also known as  
21 MAR1) appears to be involved in iron transport in plastids; its transcript  
22 abundance increases with increasing iron concentrations [88]. ABS4 is a  
23 MATE (multidrug and toxic compound extrusion) efflux transporter that is  
24 located in the Golgi complex and its transcript abundance is induced by iron  
25 and osmotic stress [89].

1 It is unclear what specific roles these iron homeostasis genes are playing in  
2 grape berry skins, but they appear to be involved in iron storage in seeds  
3 and protection against oxidative stress responses [85, 86]. One possible  
4 explanation for the transcript abundance profiles in the BOD and RNO berry  
5 skins is that ferritins are known to bind iron and are thought to reduce the  
6 free iron concentrations in the chloroplast, thus, reducing ROS production  
7 that is caused by the Fenton reaction [85]. As chloroplasts senesce during  
8 berry ripening, iron concentrations may rise as a result of the catabolism of  
9 iron-containing proteins in the thylakoid membranes; thus, berry skins may  
10 need higher concentrations of ferritins to keep free iron concentrations low.  
11 This might explain the increase in ferritin transcript abundance with  
12 increasing sugar levels. The transcript abundance differences between BOD  
13 and RNO in iron homeostasis genes also may be related to an earlier berry  
14 ripening (seed development and chloroplast degradation) in BOD berries  
15 (earlier decline at lower sugar levels) of transcript abundance of *FER2* and  
16 higher transcript abundance of *VIT1*, and the chilling temperatures (higher  
17 transcript abundance of *FER2* and *FER4*) in RNO. Most soils contain 2 to  
18 5% iron including available and unavailable iron; soils with 15 and 25  $\mu\text{g g}^{-1}$   
19 of available iron are considered moderate for grapevines [90], but soils with  
20 higher concentrations are not considered toxic. Therefore, for both soils in  
21 this study, iron concentrations can be considered to be very high but not  
22 toxic. The higher available iron concentrations in the BOD vineyard may be  
23 associated with the wetter conditions (more reductive conditions) and the  
24 lower soil pH.

25

1 *Environmental influences on transcript abundance in other studies*

2 Other researchers using Omics approaches have identified environmental

3 factors that influence grape berry transcript abundance and metabolites. One

4 study investigated the differences in transcript abundance in berries of

5 Corvina (a black-skinned grape cultivar that makes red wine) in 11 different

6 vineyards over three years [91]. They determined that approximately 18% of

7 the berry transcript abundance was affected by the environment. Climate

8 had an overwhelming effect but viticultural practices were also significant.

9 Phenylpropanoid metabolism was very sensitive to the environment and *PAL*

10 transcript abundance was associated with *STS* transcript abundance.

11 In another study of a white grape cultivar, Garganega, berries were analyzed

12 by transcriptomic and metabolomic approaches [92]. Berries were selected

13 from vineyards at different altitudes and soil types. Again, phenylpropanoid

14 metabolism was strongly influenced by the environment. Carotenoid and

15 terpenoid metabolism were influenced as well.

16 Two studies investigated the grape berry transcriptomes during the ripening

17 phase in two different regions of China, a dry region in Western China and a

18 wet region in Eastern China [93, 94]. These two locations mirror some of the

19 differences in our conditions in our study, namely moisture, light and

20 elevation, although the China western region has higher night temperatures

21 and more rainfall than the RNO location. In the Cabernet Sauvignon study

22 [93], they compared the berry transcriptomes (with seeds removed) from the

23 two regions at three different stages: pea size, veraison and maturity. The

24 TSS at maturity was slightly below 20°Brix. Similar to our study, the

25 response to stimulus, phenylpropanoid and diterpenoid metabolism GO

1 categories were highly enriched in mature berries between the two locations.

2 Differences in the transcript abundance of NCED and PR proteins were also

3 noted. Like in our study, the authors associated the transcript abundance of

4 these proteins to the dry (drought response) and wet (pathogen defense)

5 locations, respectively.

6 In the second study comparing these two regions in China [94], the effects of

7 the environment on the metabolome and transcriptome of Muscat Blanc à

8 Petits Grains berries were investigated over two seasons; specifically,

9 terpenoid metabolism was targeted. Like in our study, the transcripts in

10 terpenoid were in higher abundance in the wetter location. The transcript

11 abundances were correlated with terpenoid concentrations and a

12 coexpression network was constructed. A specific set of candidate regulatory

13 genes were identified including some terpene synthases (TPS14), glycosyl

14 transferases and 1-hydroxy-2-methyl-2-butenyl 4-diphosphate reductase

15 (HDR). We examined the transcript abundance of some of these candidate

16 genes in our own data but did not find significant differences between our

17 two locations. The contrasting results between our study and Wen et al.

18 (2015) could be for a variety of reasons such as different cultivar responses,

19 berry versus skin samples, or different environmental conditions that affect

20 terpenoid production.

21 Terpenoid metabolism is influenced by the microclimate [24] and is involved

22 in plant defense responses to pathogens and insects [32, 95]. Light exposure

23 to Sauvignon Blanc grapes (a white grape cultivar) was manipulated by

24 removing adjacent leaves without any detectable differences in berry

25 temperatures [24]. Increased light exposure increased specific carotenoid

1 and terpene concentrations in the berry. The responses of carotenoid and  
2 terpenoid production to temperature are less clear. Some effect of  
3 temperature was associated with carotenoid and terpenoid production, but to  
4 a lesser extent than light [24]. Higher concentrations of rotundone, a  
5 sesquiterpene, have been associated with cooler temperatures [96]. Water  
6 deficit can also alter carotenoid and terpenoid metabolism in grapes [11, 97].  
7 Terpenes can act as signals for insect attacks and attract insect predators  
8 [95]. Thus, terpenoid metabolism is highly sensitive to the environment and  
9 influenced by many factors.

10 In contrast to these studies, excess light and heat can affect transcript  
11 abundance and damage berry quality. In addition to a higher rate of malate  
12 catabolism, anthocyanin concentrations and some of the transcript  
13 abundances associated with them are decreased as well [98, 99].

14

#### 15 *Temperature effects on berry maturity and total soluble solids*

16 BOD berries reached maturity at a lower °Brix level than RNO berries; the  
17 cause is likely to be the warmer days and cooler nights in RNO. Higher day  
18 temperature may increase photosynthesis and sugar transport and cooler  
19 night temperatures may reduce fruit respiration. °Brix or TSS approximates  
20 the % sugar in a berry and is a reliable marker of berry maturity in any given  
21 location [100]; however, TSS is an unreliable marker of berry maturity when  
22 comparing grapes from very different climates. The differences in TSS  
23 between BOD and RNO are consistent with other studies on the temperature  
24 effects on berry development. Indirect studies have associated gradual  
25 warming over the last century to accelerated phenology and increased sugar

1 concentrations in the grape berries [101-104]. Increasing temperature can  
2 accelerate metabolism, including sugar biosynthesis and transport, but the  
3 increase in metabolism is not uniform. For example, the increase in  
4 anthocyanin concentration during the ripening phase is not affected as much  
5 as the increase in sugar concentration [105]. These responses vary with the  
6 cultivar [102], complicating this kind of analysis even further.

7 Direct studies of temperature effects on Cabernet Sauvignon berry  
8 composition also are consistent with our data. In one study, the composition  
9 of Cabernet Sauvignon berries was altered substantially for vines grown in  
10 phytotrons at 20 or 30°C temperatures (temperatures that are very similar to  
11 the BOD and RNO temperatures occurring in the present study) [106].  
12 Cooler temperatures promoted anthocyanin development and malate  
13 concentrations (inhibited malate catabolism) and higher temperatures  
14 promoted TSS (°Brix) and proline concentrations [106]. In a second study,  
15 vines were grown at 20 or 30°C day temperatures with night temperatures  
16 5°C cooler than the day [107]. In this study, higher temperatures increased  
17 berry volume and veraison started earlier by about 3 to 4 weeks [107]. The  
18 authors concluded that warmer temperatures hastened berry development.  
19 In a third study, Cabernet Sauvignon berry composition was affected in a  
20 similar manner by soil temperatures that differed by 13°C [108].

21 TSS concentrations are also affected by light and the vine water status. Light  
22 is generally not a factor because there is usually a large enough leaf area  
23 and sufficient light levels to saturate this source to sink relationship [109,  
24 110]. Sun-exposed Cabernet Sauvignon berries in the vineyard had higher  
25 TSS than shaded berries [109]. This sunlight effect was attributed largely to

1 an increase in berry temperature rather than an increase in the fluence rate  
2 per se. A higher grapevine water status results in larger berry size and lower  
3 sugar concentrations [111] and water deficit is known to increase sugar  
4 concentrations in Cabernet Sauvignon [11]. However, temperature is thought  
5 to have the largest effect on sugar concentrations [16].  
6 Other transcriptomic data in the present study indicated that BOD berries  
7 were more mature at a lower sugar level than RNO berries. These included  
8 the transcript abundance profiles of genes involved in autophagy, auxin and  
9 ABA signaling, iron homeostasis and seed development. Many of these  
10 DEGs had an accelerated rate of change in BOD berries. While these  
11 transcripts are in the skins, they may be influenced by signals coming from  
12 the seed. In addition, there was a higher transcript abundance for most  
13 genes involved with the circadian clock in BOD berries. PHYB can regulate  
14 the circadian clock [58] and PHYB activity is very sensitive to night  
15 temperatures (BOD had higher night temperatures); PHYB reversion is  
16 accelerated to the inactive form at warmer temperatures [36]. The inactivity  
17 of phytochrome promotes the expression of RVE1, which promotes auxin  
18 concentrations and seed dormancy [61]. Thus, all things considered, it is  
19 likely that temperature and/or the temperature differentials between day and  
20 night significantly contributed to the differences in the rate of berry  
21 development and sugar accumulation in the two locations.

## 22 *Are there reliable markers to harvest berries at maturity?*

23 Determining maturity of grapes is a difficult and error prone process. Reliable  
24 markers could aid in the decision of when to harvest the grapes. “Optimum”  
25



1 maturity is a judgement call and will ultimately depend on the winemaker's or  
2 grower's specific goals or preferences. A combination of empirical factors  
3 can be utilized including °Brix, total acidity, berry tasting in the mouth for  
4 aroma and tannins, seed color, etc. TSS by itself may not be the best marker  
5 for berry ripening as it appears to be uncoupled from berry maturity by  
6 temperature. Phenylpropanoid metabolism, including anthocyanin  
7 metabolism, is also highly sensitive to both abiotic and biotic stresses and  
8 may not be a good indicator of full maturity. Thus, color may not be a good  
9 indicator either. Specific developmental signals from the seed or embryo,  
10 such as those involved with auxin and ABA signaling, may provide more  
11 reliable markers for berry ripening in diverse environments, but will not be  
12 useful in seedless grapes. Aromatic compounds may also be reliable  
13 markers but they will need to be generic, developmental markers that are not  
14 influenced by the environment. This study revealed many genes that are not  
15 reliable markers because they were expressed differently in different  
16 environments. One candidate marker that is noteworthy is ATG18g  
17 (Vitvi07g00210). Its transcript abundance increased and was relatively linear  
18 with increasing °Brix and these trends were offset at the two locations  
19 relative to their level of putative fruit maturity (Fig. 3). ATG18g is required for  
20 the autophagy process [112] and maybe important during the fruit ripening  
21 phase. It was found to be a hub gene in a gene subnetwork associated with  
22 fruit ripening and chloroplast degradation [4]. Further testing will be required  
23 to know if it is essential for fruit ripening and whether its transcript  
24 abundance is influenced by abiotic and biotic stresses in grape berry skins.  
25



# 1 *Conclusions*

2 The ultimate function of a fruit is to produce fully mature seeds in order to  
3 reproduce another generation of plants. Berry ripening involves complex  
4 signaling that tells other organisms when the fruit is ready for consumption  
5 and seed dispersal. In this study, we tested and confirmed the hypothesis  
6 that the transcript abundance in grape skins differed in two different locations  
7 with different environments. Another goal was to distinguish transcripts with  
8 common profiles from differentially expressed genes. The observations  
9 made in this study provide lists of such genes and generated a large number  
10 of hypotheses to be tested in the future. WGCNA was particularly powerful  
11 and enhanced our analyses. It is clear that berry ripening may respond to a  
12 multitude of factors both before and during the late stages of berry ripening.  
13 The transcriptomic analysis in the late stages of berry ripening in this study  
14 indicated that transcript abundance was very dynamic and possibly  
15 influenced by a number of environmental and internal (e.g. seed signals)  
16 factors. We could discern these influences using functional analysis of the  
17 genes and GO enrichment analysis of the transcriptomic datasets.  
18 Temperature, light, moisture and the local microbiome were major factors  
19 that may have contributed to the transcript abundance profiles of the berry  
20 skins. While earlier fruit development stages clearly have an effect on fruit  
21 composition, the dynamic changes in transcript abundance in the late stages  
22 of berry ripening indicated that berries still have a “sense of place”; it  
23 appears that the environment continues to affect berry metabolite  
24 composition, which may impact berry flavor, color and other quality-related  
25 traits. Future studies are required to follow up on these observations. It

1 appears that fruit ripening is very malleable. Manipulation of the canopy (time  
2 and intensity of leaf removal at different locations on the plant) may offer a  
3 powerful lever to adjust gene expression and berry composition, since these  
4 parameters are strongly affected by light and temperature.

## 5 6 **Methods**

### 7 *Plant materials*

8 Grapevines in Reno (*Vitis vinifera* L. cv. Cabernet Sauvignon clone 8) were  
9 grown on their own roots at the Valley Road Experimental Vineyard at the  
10 Nevada Agricultural Experiment Station on the campus of the University of  
11 Nevada, Reno. Research approval was obtained by Grant R. Cramer from  
12 the Nevada Agricultural Experiment Station and the University of Nevada,  
13 Reno. The grapevines were originally obtained as certified material from  
14 Inland Desert Nursery, Benton, City, Washington, USA. The grapes were  
15 harvested between September 10 and October 2012 depending on maturity.  
16 Maturity was assessed using a digital refractometer (HI 96811, Hanna  
17 Instruments, Woonsocket, RI, USA) to measure soluble solids (°Brix) that are  
18 mostly made up of sugars. Berry clusters were collected between 11.00 h  
19 and 13.00 h (near solar noon) in an attempt to minimize temporal  
20 transcriptional response variations caused by the circadian clock. At harvest,  
21 individual berry °Brix levels were determined with a digital refractometer.  
22 Separated berry skins were placed into 50 mL centrifuge tubes in liquid  
23 nitrogen according to sugar level ( $1 \pm 0.5$  °Brix increments; 19 to 27 °Brix). In  
24 this way berries were collected over many days from multiple clusters from  
25 multiple vines from 3 different individually drip-irrigated blocks in the

1 vineyard. Stem-water potentials were measured weekly to determine  
 2 irrigation levels that would maintain the water status of the vines. The vines  
 3 were regularly sprayed for fungal prevention. Each block in the vineyard was  
 4 considered an experimental replicate. Soil testing was performed by A & L  
 5 Western Agricultural Laboratories (Modesto, CA, USA).  
 6 Cabernet Sauvignon clone CA33 412 grapevines in Bordeaux were grown  
 7 on SO4 rootstock at the VitAdapt parcel on the Institut National de  
 8 Recherche Agronomique (INRA) research station in Villenave d'Ornon, in the  
 9 Aquitaine region of France. There were 5 replicate blocks within this site to  
 10 mitigate soil variation. Additional details of the VitAdapt project can be found  
 11 in [113]. Berries for the three replicates were collected at the 14:00 h of the  
 12 day. Environmental conditions and variables of the Reno and BOD vineyards  
 13 are listed in Table 1. The vines were regularly sprayed for fungal prevention.  
 14 Soil testing was performed by Aurea Agrosience (Blanquefort, France).

#### 15 *RNA extraction*

16 Three experimental replicates at 20, 22, 24 and 26 °Brix were used for  
 17 sequencing. In RNO, total RNA from the three experimental replicates was  
 18 extracted from approximately 250 mg of frozen, finely ground, skin tissue (a  
 19 mixture of frozen berry skins from multiple vines and clusters from three  
 20 different blocks) using a modified CTAB extraction protocol followed by an  
 21 additional on-column DNase digestion using a Qiagen RNeasy Mini Kit  
 22 (Qiagen, Valencia, CA, USA) as in [114]. RNA quality and quantity were  
 23 assessed with a Nanodrop ND-1000 spectrophotometer (ThermoFisher  
 24 Scientific, Waltham, MA, USA) and an Agilent 2100 Bioanalyzer (Agilent  
 25 Technologies, Santa Clara, CA, USA).

1 In BOD, total RNA was extracted according to Reid et al. [115] from 1 g of  
2 frozen, finely ground berry skins. Traces of genomic DNA were removed by  
3 a DNase I treatment according to the manufacturer's instructions (Ambion  
4 TURBO DNA-free DNase, Life Technologies). The RNA was quantified using  
5 a Nanodrop 2000c spectrophotometer (Thermo Scientific) and their integrity  
6 was checked on an 1.8% agarose gel.

# 8 *RNA-seq library preparation and sequencing*

9 Cabernet Sauvignon 50 bp single-end, barcoded libraries were constructed  
10 and sequenced by the Neuroscience Genomics Core at the University of  
11 California, Los Angeles for the RNO samples and by the Genome Center at  
12 the University of California, Davis for BOD samples using Illumina TruSeq  
13 RNA library prep kits (Illumina Inc., San Diego, CA, USA) according to the  
14 manufacturer's instructions. The barcoded libraries were pooled, multiplexed,  
15 and were sequenced using Illumina TruSeq chemistry (version 3.0) on a  
16 HiSeq2000 sequencer (Illumina Inc., San Diego, CA, USA).

# 18 *Transcript abundance and statistical analysis*

19 The single-end sequence fragments (reads) generated by Illumina  
20 sequencing were base-called and demultiplexed. The fastq files generated  
21 were inspected for sequence quality and contamination using FastQC [116].  
22 Illumina adapters were removed from sequences with Trimomatic [117]  
23 version 0.36. The transcript abundance was estimated from the trimmed  
24 fastq files using Salmon [26] version 0.9.1 using the gcBias, seqBias,  
25 fldMean and fldSD flags. The index file utilized by Salmon for read

alignments was built from the V2 PN40024 *Vitis vinifera* reference genome transcriptome annotation [27] after filtering out genes with “No start”, “No stop”, “Pseudogene”, “The sequence of the model RefSeq protein was modified”, “Appear only in secondary splicing variant” annotations and using a k-mer size of 17. The salmon output (quant files) was imported into DESeq2 [28] version 1.18.1 using the tximport R package [118] for determination of differentially expressed genes (DEGs).

### 8 *Coexpression network analysis*

A coexpression gene network analysis was performed using the WGCNA software package (v1.63) in R [119, 120] using all the libraries for each location. Prior to this analysis, low-expressed genes were removed with a minimum threshold of 10 counts in all the libraries. Counts data were transformed using the function `varianceStabilizingTransformation` of the package DESeq2. The resulting set of counts was used for network construction and module detection using the function `blockwiseModules`. An adjacency matrix was created by calculating the biweight mid-correlation raised to a power  $\beta$  of 5 and the `maxPoutliers` parameter set to 0.05. The subsequent Topological Overlap Matrix (TOM) was used for module detection using the `DynamicTreecut` algorithm with a minimal module size of 30 and a branch merge cut height of 0.25. The module eigengenes were used to evaluate the association between the resulting modules (22) and the experimental traits (Brix degrees and locations).

23

### 24 *Gene functional annotation*

1 Gene models of the V3 annotation were searched against different protein  
2 databases with the blastx function of the DIAMOND version 0.9.19 software  
3 [121] using default parameters and reporting alignments in the 1% range of  
4 the top alignment score. For each V3 gene model, the best blast hit was kept  
5 (1-to-1). For multiple hits with the same score (1-to-many), the first hit was  
6 kept as the representative result but the other hits are still accessible. The  
7 databases used were Araport11 (release 06.17.16, <https://www.araport.org/>),  
8 the *Arabidopsis thaliana* TAIR10 (<http://www.arabidopsis.org/index.jsp>) and  
9 the *Vitis vinifera* IGGP 12X from Ensembl plants 38  
10 (<https://plants.ensembl.org/index.html>) and the refseq plant protein database  
11 (release 03.12.18, <https://www.ncbi.nlm.nih.gov/refseq/>). The corresponding  
12 gene annotations were obtained from the Araport11 gff file (release  
13 06.22.16), TAIR10 functional descriptions (release 01.16.13), a manually  
14 curated and actualized grapevine V1 annotation and from the refseq  
15 database.

16

# 17 *Functional enrichment of GO categories*

18 Gene Ontology (GO) enrichment was performed using the R software  
19 package topGO [122]. Enriched functional categories with an FDR adjusted  
20 p-value > 0.01 after the Fisher's test were filtered for further analysis. For  
21 gene ontology (GO) categories assignments, interproscan version 5.32-71.0  
22 was performed on the full genome with the options -iprlookup and -  
23 goterms [123]. These new annotations were combined with the previously  
24 manually curated GO annotations of the V1 gene models.

25



# 1 **Abbreviations**

2 **ABA:** ABscisic Acid **ABCG:** Adenosine triphosphate Binding Casette G

3 **ABF:** Abscisic acid responsive elements Binding Factor **ABS:** Abnormal

4 Shoot **ACO1:** ACc Oxidase 1 **ACOL:** ACc Oxidase-Like **APG9:**

5 AutoPhaGy 9 **ARF:** Auxin Response Factor **ATG:** AuTophagy **ATH:**

6 Arabidopsis Thaliana abc2 Homolog **BAM:** Barley Any Meristem **BCAT:**

7 Branched-Chain-amino-acid AminoTransferase **BOD:** BOrDeaux **bp:**

8 **base pair CCA1:** Circadian Clock Associated 1 **CLE:** CLavata3/Esr-

9 related **COP1:** COnstitutive Photomorphogenic 1 **CML:** CalModuLin

10 **CRY3:** CRYptochrome 3 **cv:** cultivar **DEG(s):** Differentially Expressed

11 Gene(s) **DHS:** 3-deoxy-D-arabino-heptulosonate 7-phosphate synthase

12 **DMAPP:** dimethylallyl diphosphate **DXR:** 1-deoxy-D-Xylulose 5-

13 phosphate Reductoisomerase **EC:** Evening Complex **EE:** Evening

14 Element **EIN:** Ethylene INsensitive **ELF:** EarLy Flowering **ERF:** Ethylene

15 Response Factor **FAR1:** Far-Red impaired Response 1 **FDR:** False

16 Discovery Rate **FER:** FERritin **FOP1:** FOlded Petal 1 **FRS:** FAR1-

17 Related Sequence **GO:** Gene Ontology **HDS:** 4-Hydroxy-3-methylbut-2-

18 en-1-yl Diphosphate Synthase **IAA:** Indole Acetic Acid **IPP:** IsoPentenyl

19 Pyrophosphate **IREG:** Iron REGulated **JAR:** JASmonate Resistant **MEP:**

20 MethylErythritol 4-Phosphate **MLA:** intracellular MiLdew A **NCBI:**

21 National Center for Biotechnology Information **NCED:** Nine-Cis

22 Epoxycarotenoid Dioxygenase **PAL:** PhenylAlanine Lyase **PCL1:**

23 PhytoCLOCK 1 **PHY:** PHYtochrome **PIF:** Phytochrome Interacting Factor

24 **PR:** Pathogenesis Related **PRR:** Psuedo-Response Regulator **PSY:**

25 Phytoene SYnthase **RNO:** ReNO **RVE1:** ReVeille 1 **SA:** Salicylic Acid



1 **SIA:** Salt Induced Abc kinase **SnRK:** SNF1 Related protein Kinase **STS:**  
2 STilbene Synthase **SULTR:** SULfur TRansporter **TAIR:** The Arabidopsis  
3 Information Resource **TAT:** TyrosineAmino Transferase **TOC:** Timing Of  
4 Cab expression **TPPD:** Trehalose Phosphate Phosphatase D **TPL:**  
5 ToPLess **TPM:** Transcripts Per Million **TPS:** TerPene Synthase **TSS:**  
6 Total Soluble Solids **VIT:** Vacuolar Iron Transporter **WGCNA:** Weighted  
7 Gene Co-expression Network Analysis **XTH:** Xyloglucan  
8 endoTransglucosylase/Hydrolase **YSL:** Yellow Stripe-Like

## 9 **Declarations**

## 10 **Ethics**

11 Not applicable.

12

## 13 **Consent to publish**

14 Not applicable.

15

## 16 **Competing interests**

17 The authors declare that they have no competing interests.

18

## 19 **Authors' contributions**

20 GRC, SG, and AD-I designed the experiments. RG and AH collected  
21 berries, analyzed the °Brix levels and extracted the RNA. NC functionally  
22 annotated the V3 gene models, performed the WGCNA and assisted with  
23 estimation of the TPMs. GRC processed and analyzed the data and  
24 wrote the body of the paper. All authors reviewed, edited and approved  
25 the final version of the manuscript.

1

## 2 **Availability of supporting data**

3 RNA-seq data were deposited with the Sequence Read Archive (SRA)  
4 database at the National Center for Biotechnology Information (NCBI)  
5 with the SRA accession number PRJNA260535 [124] for the RNO data  
6 and SRP149949 for the BOD data.

7

## 8 **Acknowledgements**

9 We would like to thank Aude Habran for her assistance in collecting berry  
10 skins and extraction RNA in BOD berries and thank the many UNR  
11 Biochemistry senior thesis undergraduate students that assisted in berry  
12 separation in the RNO berries.

## **Funding**

This research was supported by the University of Nevada, Reno,  
Agriculture Experimental Station with the Multi-state USDA-Hatch Grant  
NEV00383A to GRC.

## Tables

**Table 1.** Environmental variables for the harvest times in BOD and RNO. Grapes were harvested in RNO from September 10 to 26, 2012 and in BOD from September 17 to October 8, 2013.

| Environmental Variable                                 | BOD (2013)     | RNO (2012)   |
|--------------------------------------------------------|----------------|--------------|
| Elevation (m)                                          | 25             | 1,373        |
| Average Daily Solar Radiation (kW-hr m <sup>-2</sup> ) | 1.17           | 5.86         |
| Day length Starting Harvest Date                       | 12:25:36       | 12:38:34     |
| Day length Ending Harvest Date                         | 11:20:57       | 11:57:37     |
| Maximum Temperature Starting Harvest Date              | 19             | 30.5         |
| Minimum Temperature Starting Harvest Date              | 13             | 13.9         |
| Maximum Temperature Ending Harvest Date                | 18             | 27.8         |
| Minimum Temperature Ending Harvest Date (°C)           | 11             | 6.7          |
| Ave September Maximum Temperature (°C)                 | 23.9           | 30.2         |
| Ave September Minimum Temperature (°C)                 | 13.9           | 10.2         |
| Latitude                                               | 44°47'23.83" N | 39°52'96" N  |
| Longitude                                              | 0°34'39.3" W   | 119°81'38" W |
| September Precipitation (mm)                           | 65.5           | 2.03         |
| Average Monthly Relative Humidity (%)                  | 74             | 34           |
| Soil Type                                              | Gravelly soil  | Sandy Loam   |
| Soil pH                                                | 6.2            | 6.7          |
| Soil Fe (µg g <sup>-1</sup> )                          | 193            | 38           |
| Root stock                                             | SO4            | Own-rooted   |

## Supplemental Information

**Additional file 1.** Log<sub>2</sub> transcripts per million (TPM) to genes uniquely mapped to the V2 PN40024 grape genome.

**Additional File 2.** Functional annotation of all V3 structurally annotated genes.

**Additional file 3.** Differentially expresses genes (DEGs) determined by DESeq2 for berry skin samples at 22°Brix from BOD and RNO.

**Additional file 4.** Statistical results from gene set enrichment analysis of the DEGs using topGO.

**Additional file 5.** Image of the top 25 connected GO categories in the topGO network of the DEGs in Additional file 4.

**Additional file 6.** Module membership (MM) of all filtered transcripts as defined by WGCNA. Values are the kME (module eigengene connectivity).

**Additional file 7.** Heatmap correlation of berry traits (°Brix level, BOD, RNO) of each of 19 gene modules. Gene modules were identified by a color name (MMcolornumber) as assigned by the WGCNA R package. Values in each heatmap block are the correlation (left value) and p-value (in parentheses) of the module with the berry trait.

**Additional file 8.** topGO analysis of all modules with genes having a kME >0.80. The results for each module are on a separate tab within the file.

**Additional file 9.** topGO analysis of the top 400 genes with the greatest differential expression between high and low °Brix samples in BOD berry skins.

**Additional file 10.** topGO analysis of the top 400 genes with the greatest differential expression between high and low °Brix samples in RNO berry skins.

**Additional file 11.** Transcript profiles of stilbene synthase (STS) genes that were differentially expressed.

**Additional file 12.** Transcript abundance of circadian clock genes from BOD and RNO berry skins. The data are placed on a circadian clock model derived from [4]. Lines in the model represent known interactions between genes; red arrows are positive interactions, black lines are negative interactions, and blue lines indicate direct physical interactions but the direction, positive or negative, is unknown. No lines indicate that there are no known interactions at this time. Transcript profiles outlined in red highlight significantly higher transcript abundance for the BOD berries.

**Additional file 13.** A model of the peripheral genes including light sensing genes that interact with core circadian clock genes in BOD and RNO berry skins. Lines represent gene interactions as described in Additional file 12. Red and blue lightning bolts represent the reception of their respective light wavelengths for each gene symbol. Transcript profiles outlined in red highlight significantly higher transcript abundance for the BOD berries.

**Additional file 14.** Transcript profiles of ABA biosynthesis and signaling genes that are differentially expressed between BOD and RNO berry skins.

## References

1. This P, Lacombe T, Thomas MR: **Historical origins and genetic diversity of wine grapes**. *Trends in Genetics* 2006, **22**(9):511-519.
2. Kuhn N, Guan L, Dai ZW, Wu BH, Lauvergeat V, Gomes E, Li SH, Godoy F, Arce-Johnson P, Delrot S: **Berry ripening: recently heard through the grapevine**. *Journal of Experimental Botany* 2014, **65**(16):4543-4559.
3. Fortes AM, Teixeira RT, Agudelo-Romero P: **Complex Interplay of Hormonal Signals during Grape Berry Ripening**. *Molecules* 2015, **20**(5):9326-9343.
4. Ghan R, Petereit J, Tillett RL, Schlauch KA, Toubiana D, Fait A, Cramer GR: **The common transcriptional subnetworks of the grape berry skin in the late stages of ripening**. *BMC Plant Biol* 2017, **17**(1):94.
5. Gonzalez-Barreiro C, Rial-Otero R, Cancho-Grande B, Simal-Gandara J: **Wine aroma compounds in grapes: a critical review**. *Crit Rev Food Sci Nutr* 2015, **55**(2):202-218.
6. Boss PK, Kalua CM, Nicholson EL, Maffei SM, Böttcher C, Davies C: **Fermentation of grapes throughout development identifies stages critical to the development of wine volatile composition**. *Australian Journal of Grape and Wine Research* 2018, **24**(1):24-37.
7. Boss PK, Pearce AD, Zhao Y, Nicholson EL, Dennis EG, Jeffery DW: **Potential grape-derived contributions to volatile ester concentrations in wine**. *Molecules* 2015, **20**(5):7845-7873.
8. Dennis EG, Keyzers RA, Kalua CM, Maffei SM, Nicholson EL, Boss PK: **Grape contribution to wine aroma. Production of hexyl acetate, octyl acetate and benzyl acetate during yeast fermentation is dependent upon precursors in the must**. *Journal of Agricultural and Food Chemistry* 2012.
9. Sun P, Schuurink RC, Caissard JC, Hugueney P, Baudino S: **My Way: Noncanonical Biosynthesis Pathways for Plant Volatiles**. *Trends Plant Sci* 2016, **21**(10):884-894.
10. Schwab W, Wust M: **Understanding the Constitutive and Induced Biosynthesis of Mono- and Sesquiterpenes in Grapes (Vitis vinifera): A Key to Unlocking the Biochemical Secrets of Unique Grape Aroma Profiles**. *J Agric Food Chem* 2015, **63**(49):10591-10603.

11. Deluc LG, Quilici DR, Decendit A, Grimplet J, Wheatley MD, Schlauch KA, Merillon JM, Cushman JC, Cramer GR: **Water deficit alters differentially metabolic pathways affecting important flavor and quality traits in grape berries of Cabernet Sauvignon and Chardonnay**. *BMC Genomics* 2009, **10**:212.
12. Cramer GR, Evans J, Ardelean R, Keady M, Quilici D, Schooley DA: **Impacts of regulated-deficit irrigation on the flavor components of grapes and wines**. In: *Macromolecules and Secondary Metabolites of Grapevine and Wine*. Edited by Jeandet P, Clément C, Conreux A. Paris: Lavoisier; 2007: 53-59.
13. Koundouras S, Marinos V, Gkoulioti A, Kotseridis Y, van Leeuwen C: **Influence of vineyard location and vine water status on fruit maturation of nonirrigated cv. Agiorgitiko (*Vitis vinifera* L.). Effects on wine phenolic and aroma components**. *J Agric Food Chem* 2006, **54**:5077-5086.
14. Drappier J, Thibon C, Rabot A, Geny-Denis L: **Relationship between wine composition and temperature: Impact on Bordeaux wine typicity in the context of global warming—Review**. *Critical Reviews in Food Science and Nutrition* 2017:1-17.
15. van Leeuwen C, Friant P, Choné X, Tregoat O, Koundouras S, Dubourdieu D: **Influence of Climate, Soil, and Cultivar on Terroir**. *American Journal of Enology and Viticulture* 2004, **55**(3):207.
16. Martínez-Lüscher J, Kizildeniz T, Vučetić V, Dai Z, Luedeling E, van Leeuwen C, Gomès E, Pascual I, Irigoyen JJ, Morales F, Delrot S: **Sensitivity of Grapevine Phenology to Water Availability, Temperature and CO<sub>2</sub> Concentration**. *Frontiers in Environmental Science* 2016, **4**:48.
17. Bokulich NA, Collins TS, Masarweh C, Allen G, Heymann H, Ebeler SE, Mills DA: **Associations among Wine Grape Microbiome, Metabolome, and Fermentation Behavior Suggest Microbial Contribution to Regional Wine Characteristics**. *mBio* 2016, **7**(3).
18. Berdeja M, Nicolas P, Kappel C, Dai ZW, Hilbert G, Peccoux A, Lafontaine M, Ollat N, Gomès E, Delrot S: **Water limitation and rootstock genotype interact to alter grape berry metabolism through transcriptome reprogramming**. *Horticulture Research* 2015, **2**:15012.
19. Marè C, Aprile A, Roncaglia E, Tocci E, Corino LG, De Bellis L, Cattivelli L: **Rootstock and soil induce transcriptome modulation of phenylpropanoid pathway in grape leaves**. *Journal of Plant Interactions* 2013, **8**(4):334-349.



20. Cookson SJ, Ollat N: **Grafting with rootstocks induces extensive transcriptional re-programming in the shoot apical meristem of grapevine.** *BMC Plant Biol* 2013, **13**:147.
21. Corso M, Vannozzi A, Ziliotto F, Zouine M, Maza E, Nicolato T, Vitulo N, Meggio F, Valle G, Bouzayen M, Müller M, Munné-Bosch S, Lucchin M, Bonghi C: **Grapevine Rootstocks Differentially Affect the Rate of Ripening and Modulate Auxin-Related Genes in Cabernet Sauvignon Berries.** *Frontiers in plant science* 2016, **7**:69.
22. Cochetel N, Escudie F, Cookson SJ, Dai Z, Vivin P, Bert PF, Munoz MS, Delrot S, Klopp C, Ollat N, Lauvergeat V: **Root transcriptomic responses of grafted grapevines to heterogeneous nitrogen availability depend on rootstock genotype.** *Journal of Experimental Botany* 2017, **68**(15):4339-4355.
23. Downey MO, Dokoozlian NK, Krstic MP: **Cultural Practice and Environmental Impacts on the Flavonoid Composition of Grapes and Wine: A Review of Recent Research.** *American Journal of Enology and Viticulture* 2006, **57**(3):257-268.
24. Young PR, Eyeghe-Bickong HA, du Plessis K, Alexandersson E, Jacobson DA, Coetzee Z, Deloire A, Vivier MA: **Grapevine Plasticity in Response to an Altered Microclimate: Sauvignon Blanc Modulates Specific Metabolites in Response to Increased Berry Exposure.** *Plant Physiology* 2016, **170**(3):1235-1254.
25. Fabres PJ, Collins C, Cavagnaro TR, Rodriguez Lopez CM: **A Concise Review on Multi-Omics Data Integration for Terroir Analysis in Vitis vinifera.** *Frontiers in plant science* 2017, **8**:1065.
26. Patro R, Duggal G, Love MI, Irizarry RA, Kingsford C: **Salmon provides fast and bias-aware quantification of transcript expression.** *Nat Methods* 2017, **14**(4):417-419.
27. Canaguier A, Grimplet J, Di Gaspero G, Scalabrin S, Duchene E, Choisine N, Mohellibi N, Guichard C, Rombauts S, Le Clainche I, Berard A, Chauveau A, Bounon R, Rustenholz C, Morgante M, Le Paslier MC, Brunel D, Adam-Blondon AF: **A new version of the grapevine reference genome assembly (12X.v2) and of its annotation (VCost.v3).** *Genom Data* 2017, **14**:56-62.
28. Love MI, Huber W, Anders S: **Moderated estimation of fold change and dispersion for RNA-seq data with DESeq2.** *Genome Biology* 2014, **15**(12):1-21.
29. Guo P, Li Z, Huang P, Li B, Fang S, Chu J, Guo H: **A Tripartite Amplification Loop Involving the Transcription Factor**

**WRKY75, Salicylic Acid, and Reactive Oxygen Species Accelerates Leaf Senescence.** *The Plant Cell* 2017, **29**(11):2854-2870.

30. Qiu K, Li Z, Yang Z, Chen J, Wu S, Zhu X, Gao S, Gao J, Ren G, Kuai B, Zhou X: **EIN3 and ORE1 Accelerate Degreening during Ethylene-Mediated Leaf Senescence by Directly Activating Chlorophyll Catabolic Genes in Arabidopsis.** *PLoS Genet* 2015, **11**(7):e1005399.
31. Li Z, Peng J, Wen X, Guo H: **Ethylene-insensitive3 is a senescence-associated gene that accelerates age-dependent leaf senescence by directly repressing miR164 transcription in Arabidopsis.** *The Plant Cell* 2013, **25**(9):3311-3328.
32. Martin DM, Aubourg S, Schouwey MB, Daviet L, Schalk M, Toub O, Lund ST, Bohlmann J: **Functional annotation, genome organization and phylogeny of the grapevine (*Vitis vinifera*) terpene synthase gene family based on genome assembly, FLcDNA cloning, and enzyme assays.** *BMC Plant Biology* 2010, **10**:226.
33. Dudareva N, Martin D, Kish CM, Kolosova N, Gorenstein N, Faldt J, Miller B, Bohlmann J: **(E)-beta-ocimene and myrcene synthase genes of floral scent biosynthesis in snapdragon: function and expression of three terpene synthase genes of a new terpene synthase subfamily.** *The Plant Cell* 2003, **15**(5):1227-1241.
34. Young PR, Lashbrooke JG, Alexandersson E, Jacobson D, Moser C, Velasco R, Vivier MA: **The genes and enzymes of the carotenoid metabolic pathway in *Vitis vinifera* L.** *BMC Genomics* 2012, **13**:243.
35. Jung J-H, Domijan M, Klose C, Biswas S, Ezer D, Gao M, Khattak AK, Box MS, Charoensawan V, Cortijo S, Kumar M, Grant A, Locke JCW, Schäfer E, Jaeger KE, Wigge PA: **Phytochromes function as thermosensors in Arabidopsis.** *Science* 2016, **354**(6314):886.
36. Legris M, Klose C, Burgie ES, Rojas CC, Neme M, Hiltbrunner A, Wigge PA, Schafer E, Vierstra RD, Casal JJ: **Phytochrome B integrates light and temperature signals in Arabidopsis.** *Science* 2016, **354**(6314):897-900.
37. Tattersall EA, Grimplet J, Deluc L, Wheatley MD, Vincent D, Osborne C, Ergul A, Lomen E, Blank RR, Schlauch KA, Cushman JC, Cramer GR: **Transcript abundance profiles reveal larger and more complex responses of grapevine to chilling compared to osmotic and salinity stress.** *Funct Integr Genomics* 2007, **7**(4):317-333.

38. Jaglo-Ottoson KR, Gilmour SJ, Zarka DG, Schabenberger O, Thomashow MF: ***Arabidopsis* CBF1 overexpression induces COR genes and enhances freezing tolerance.** *Science* 1998, **280**:104-106.
39. Fernandez O, Vandesteene L, Feil R, Baillieul F, Lunn JE, Clement C: **Trehalose metabolism is activated upon chilling in grapevine and might participate in Burkholderia phytofirmans induced chilling tolerance.** *Planta* 2012, **236**(2):355-369.
40. Lunn JE, Delorge I, Figueroa CM, Van Dijck P, Stitt M: **Trehalose metabolism in plants.** *Plant Journal* 2014, **79**(4):544-567.
41. Fung RW, Gonzalo M, Fekete C, Kovacs LG, He Y, Marsh E, McIntyre LM, Schachtman DP, Qiu W: **Powdery mildew induces defense-oriented reprogramming of the transcriptome in a susceptible but not in a resistant grapevine.** *Plant Physiology* 2008, **146**(1):236-249.
42. Davies C, Boss PK, Robinson SP: **Treatment of grape berries, a nonclimacteric fruit with a synthetic auxin, retards ripening and alters the expression of developmentally regulated genes.** *Plant Physiology* 1997, **115**:1155-1161.
43. Böttcher C, Boss PK, Davies C: **Delaying Riesling grape berry ripening with a synthetic auxin affects malic acid metabolism and sugar accumulation, and alters wine sensory characters.** *Functional Plant Biology* 2012, **39**(9):745.
44. Cramer GR: **Abiotic stress & plant responses from the whole vine to the genes.** *Australian Journal of Grape and Wine Research* 2010, **16**:86-93.
45. Tan BC, Joseph LM, Deng WT, Liu L, Li QB, Cline K, McCarty DR: **Molecular characterization of the *Arabidopsis* 9-cis epoxycarotenoid dioxygenase gene family.** *Plant Journal* 2003, **35**(1):44-56.
46. Frey A, Effroy D, Lefebvre V, Seo M, Perreau F, Berger A, Sechet J, To A, North HM, Marion-Poll A: **Epoxycarotenoid cleavage by NCED5 fine-tunes ABA accumulation and affects seed dormancy and drought tolerance with other NCED family members.** *Plant Journal* 2012, **70**(3):501-512.
47. Rattanakon S, Ghan R, Gambetta GA, Deluc LG, Schlauch KA, Cramer GR: **Abscisic acid transcriptomic signaling varies with grapevine organ.** *BMC Plant Biol* 2016, **16**(1):72.
48. Hopper DW, Ghan R, Schlauch KA, Cramer GR: **Transcriptomic network analyses of leaf dehydration responses identify highly connected ABA and ethylene signaling hubs in three**

**grapevine species differing in drought tolerance.** *BMC Plant Biol* 2016, **16**(1):118.

49. Takahashi F, Suzuki T, Osakabe Y, Betsuyaku S, Kondo Y, Dohmae N, Fukuda H, Yamaguchi-Shinozaki K, Shinozaki K: **A small peptide modulates stomatal control via abscisic acid in long-distance signalling.** *Nature* 2018.
50. Broekaert WF, Delaure SL, De Bolle MF, Cammue BP: **The role of ethylene in host-pathogen interactions.** *Annu Rev Phytopathol* 2006, **44**:393-416.
51. Dubois M, Van den Broeck L, Inze D: **The Pivotal Role of Ethylene in Plant Growth.** *Trends Plant Sci* 2018, **23**(4):311-323.
52. Liu M, Pirrello J, Chervin C, Roustan JP, Bouzayen M: **Ethylene Control of Fruit Ripening: Revisiting the Complex Network of Transcriptional Regulation.** *Plant Physiology* 2015, **169**(4):2380-2390.
53. Chang KN, Zhong S, Weirauch MT, Hon G, Pelizzola M, Li H, Huang SS, Schmitz RJ, Urich MA, Kuo D, Nery JR, Qiao H, Yang A, Jamali A, Chen H, Ideker T, Ren B, Bar-Joseph Z, Hughes TR, Ecker JR: **Temporal transcriptional response to ethylene gas drives growth hormone cross-regulation in Arabidopsis.** *Elife* 2013, **2**:e00675.
54. Van den Broeck L, Dubois M, Vermeersch M, Storme V, Matsui M, Inze D: **From network to phenotype: the dynamic wiring of an Arabidopsis transcriptional network induced by osmotic stress.** *Mol Syst Biol* 2017, **13**(12):961.
55. Jiao Y, Ma L, Strickland E, Deng XW: **Conservation and divergence of light-regulated genome expression patterns during seedling development in rice and Arabidopsis.** *The Plant Cell* 2005, **17**(12):3239-3256.
56. Hu W, Su YS, Lagarias JC: **A light-independent allele of phytochrome B faithfully recapitulates photomorphogenic transcriptional networks.** *Mol Plant* 2009, **2**(1):166-182.
57. Delker C, van Zanten M, Quint M: **Thermosensing Enlightened.** *Trends Plant Sci* 2017, **22**(3):185-187.
58. Hsu PY, Harmer SL: **Wheels within wheels: the plant circadian system.** *Trends Plant Sci* 2014, **19**(4):240-249.
59. Johansson M, Staiger D: **Time to flower: interplay between photoperiod and the circadian clock.** *Journal of Experimental Botany* 2015, **66**(3):719-730.

60. Huang H, Alvarez S, Bindbeutel R, Shen Z, Naldrett MJ, Evans BS, Briggs SP, Hicks LM, Kay SA, Nusinow DA: **Identification of Evening Complex Associated Proteins in Arabidopsis by Affinity Purification and Mass Spectrometry.** *Mol Cell Proteomics* 2016, **15**(1):201-217.
61. Jiang Z, Xu G, Jing Y, Tang W, Lin R: **Phytochrome B and REVEILLE1/2-mediated signalling controls seed dormancy and germination in Arabidopsis.** *Nat Commun* 2016, **7**:12377.
62. Leivar P, Monte E, Al-Sady B, Carle C, Storer A, Alonso JM, Ecker JR, Quail PH: **The Arabidopsis phytochrome-interacting factor PIF7, together with PIF3 and PIF4, regulates responses to prolonged red light by modulating phyB levels.** *The Plant Cell* 2008, **20**(2):337-352.
63. Kidokoro S, Maruyama K, Nakashima K, Imura Y, Narusaka Y, Shinwari ZK, Osakabe Y, Fujita Y, Mizoi J, Shinozaki K, Yamaguchi-Shinozaki K: **The phytochrome-interacting factor PIF7 negatively regulates DREB1 expression under circadian control in Arabidopsis.** *Plant Physiology* 2009, **151**(4):2046-2057.
64. Rawat R, Schwartz J, Jones MA, Sairanen I, Cheng Y, Andersson CR, Zhao Y, Ljung K, Harmer SL: **REVEILLE1, a Myb-like transcription factor, integrates the circadian clock and auxin pathways.** *Proc Natl Acad Sci U S A* 2009, **106**(39):16883-16888.
65. Gupta SK, Sharma S, Santisree P, Kilambi HV, Appenroth K, Sreelakshmi Y, Sharma R: **Complex and shifting interactions of phytochromes regulate fruit development in tomato.** *Plant Cell Environment* 2014, **37**(7):1688-1702.
66. Kuhn N, Ormeno-Nunez J, Jaque-Zamora G, Perez FJ: **Photoperiod modifies the diurnal expression profile of VvPHYA and VvPHYB transcripts in field-grown grapevine leaves.** *Journal of Plant Physiology* 2009, **166**(11):1172-1180.
67. Stockinger EJ, Gilmour SJ, Thomashow MF: **Arabidopsis thaliana CBF1 encodes an AP2 domain-containing transcriptional activator that binds to the C-repeat/DRE, a cis-acting DNA regulatory element that stimulates transcription in response to low temperature and water deficit.** *Proceedings of the National Academy of Sciences of the United States of America* 1997, **94**(February):1035-1040.
68. Tillett RL, Wheatley MD, Tattersall EA, Schlauch KA, Cramer GR, Cushman JC: **The Vitis vinifera C-repeat binding protein 4 (VvCBF4) transcriptional factor enhances freezing tolerance in wine grape.** *Plant Biotechnology Journal* 2012, **10**(1):105-124.



69. Cramer GR, Ghan R, Schlauch KA, Tillett RL, Heymann H, Ferrarini A, Delledonne M, Zenoni S, Fasoli M, Pezzotti M: **Transcriptomic analysis of the late stages of grapevine ( Vitis vinifera cv. Cabernet Sauvignon) berry ripening reveals significant induction of ethylene signaling and flavor pathways in the skin.** *BMC Plant Biol* 2014, **14**(1):370.
70. Nakashima K, Yamaguchi-Shinozaki K: **ABA signaling in stress-response and seed development.** *Plant Cell Rep* 2013, **32**(7):959-970.
71. Nicolas P, Lecourieux D, Kappel C, Cluzet S, Cramer G, Delrot S, Lecourieux F: **The basic leucine zipper transcription factor ABSCISIC ACID RESPONSE ELEMENT-BINDING FACTOR2 is an important transcriptional regulator of abscisic acid-dependent grape berry ripening processes.** *Plant Physiology* 2014, **164**(1):365-383.
72. Wang R, Estelle M: **Diversity and specificity: auxin perception and signaling through the TIR1/AFB pathway.** *Curr Opin Plant Biol* 2014, **21**:51-58.
73. Liu X, Zhang H, Zhao Y, Feng Z, Li Q, Yang HQ, Luan S, Li J, He ZH: **Auxin controls seed dormancy through stimulation of abscisic acid signaling by inducing ARF-mediated ABI3 activation in Arabidopsis.** *Proc Natl Acad Sci U S A* 2013, **110**(38):15485-15490.
74. Wang L, Hua D, He J, Duan Y, Chen Z, Hong X, Gong Z: **Auxin Response Factor2 (ARF2) and its regulated homeodomain gene HB33 mediate abscisic acid response in Arabidopsis.** *PLoS Genet* 2011, **7**(7):e1002172.
75. Jeandet P, Douillet-Breuil AC, Bessis R, Debord S, Sbaghi M, Adrian M: **Phytoalexins from the Vitaceae: biosynthesis, phytoalexin gene expression in transgenic plants, antifungal activity, and metabolism.** *J Agric Food Chem* 2002, **50**(10):2731-2741.
76. Dufour MC, Magnin N, Dumas B, Vergnes S, Corio-Costet MF: **High-throughput gene-expression quantification of grapevine defense responses in the field using microfluidic dynamic arrays.** *BMC Genomics* 2016, **17**(1):957.
77. Jacobs AK, Dry IB, Robinson SP: **Induction of different pathogenesis-related cDNAs in grapevine infected with powdery mildew and treated with ethephon.** *Plant Pathology* 1999, **48**(3):325-336.
78. Belhadj A, Telef N, Cluzet S, Bouscaut J, Corio-Costet MF, Merillon JM: **Ethephon elicits protection against Erysiphe**

- necator in grapevine.** *J Agric Food Chem* 2008, **56**(14):5781-5787.
79. Dixon RA, Paiva NL: **Stress-Induced Phenylpropanoid Metabolism.** *The Plant Cell* 1995, **7**(7):1085-1097.
  80. Huang J, Gu M, Lai Z, Fan B, Shi K, Zhou YH, Yu JQ, Chen Z: **Functional analysis of the Arabidopsis PAL gene family in plant growth, development, and response to environmental stress.** *Plant Physiology* 2010, **153**(4):1526-1538.
  81. Shi P, Li B, Chen H, Song C, Meng J, Xi Z, Zhang Z: **Iron Supply Affects Anthocyanin Content and Related Gene Expression in Berries of Vitis vinifera cv. Cabernet Sauvignon.** *Molecules* 2017, **22**(2).
  82. Manara A, DalCorso G, Leister D, Jahns P, Baldan B, Furini A: **AtSIA1 AND AtOSA1: two Abc1 proteins involved in oxidative stress responses and iron distribution within chloroplasts.** *New Phytol* 2014, **201**(2):452-465.
  83. Chen CC, Chien WF, Lin NC, Yeh KC: **Alternative functions of Arabidopsis Yellow Stripe-Like3: from metal translocation to pathogen defense.** *PLoS One* 2014, **9**(5):e98008.
  84. Chu HH, Chiecko J, Punshon T, Lanzirotti A, Lahner B, Salt DE, Walker EL: **Successful reproduction requires the function of Arabidopsis Yellow Stripe-Like1 and Yellow Stripe-Like3 metal-nicotianamine transporters in both vegetative and reproductive structures.** *Plant Physiology* 2010, **154**(1):197-210.
  85. Ravet K, Touraine B, Boucherez J, Briat JF, Gaymard F, Cellier F: **Ferritins control interaction between iron homeostasis and oxidative stress in Arabidopsis.** *Plant Journal* 2009, **57**(3):400-412.
  86. Ravet K, Touraine B, Kim SA, Cellier F, Thomine S, Guerinot ML, Briat JF, Gaymard F: **Post-translational regulation of AtFER2 ferritin in response to intracellular iron trafficking during fruit development in Arabidopsis.** *Mol Plant* 2009, **2**(5):1095-1106.
  87. Tarantino D, Petit JM, Lobreaux S, Briat JF, Soave C, Murgia I: **Differential involvement of the IDRS cis-element in the developmental and environmental regulation of the AtFer1 ferritin gene from Arabidopsis.** *Planta* 2003, **217**(5):709-716.
  88. Conte S, Stevenson D, Furner I, Lloyd A: **Multiple antibiotic resistance in Arabidopsis is conferred by mutations in a chloroplast-localized transport protein.** *Plant Physiology* 2009, **151**(2):559-573.

89. Seo PJ, Park J, Park MJ, Kim YS, Kim SG, Jung JH, Park CM: **A Golgi-localized MATE transporter mediates iron homeostasis under osmotic stress in Arabidopsis**. *Biochemistry Journal* 2012, **442**(3):551-561.
90. Moyer MM, Singer SD, Davenport JR, Hoheisel G-A: **Vineyard Nutrient Management in Washington State**. In.: Washington State University Extension; 2018: 1-45.
91. Dal Santo S, Tornielli GB, Zenoni S, Fasoli M, Farina L, Anesi A, Guzzo F, Delledonne M, Pezzotti M: **The plasticity of the grapevine berry transcriptome**. *Genome Biol* 2013, **14**(6):r54.
92. Dal Santo S, Fasoli M, Negri S, D'Inca E, Vicenzi N, Guzzo F, Tornielli GB, Pezzotti M, Zenoni S: **Plasticity of the Berry Ripening Program in a White Grape Variety**. *Frontiers in plant science* 2016, **7**:970.
93. Sun R, He F, Lan Y, Xing R, Liu R, Pan Q, Wang J, Duan C: **Transcriptome comparison of Cabernet Sauvignon grape berries from two regions with distinct climate**. *Journal of Plant Physiology* 2015, **178**:43-54.
94. Wen YQ, Zhong GY, Gao Y, Lan YB, Duan CQ, Pan QH: **Using the combined analysis of transcripts and metabolites to propose key genes for differential terpene accumulation across two regions**. *BMC Plant Biol* 2015, **15**:240.
95. Singh B, Sharma RA: **Plant terpenes: defense responses, phylogenetic analysis, regulation and clinical applications**. *3 Biotech* 2015, **5**(2):129-151.
96. Zhang P, Barlow S, Krstic M, Herderich M, Fuentes S, Howell K: **Within-Vineyard, Within-Vine, and Within-Bunch Variability of the Rotundone Concentration in Berries of Vitis vinifera L. cv. Shiraz**. *J Agric Food Chem* 2015, **63**(17):4276-4283.
97. Ou C, Du X, Shellie K, Ross C, Qian MC: **Volatile compounds and sensory attributes of wine from Cv. Merlot (Vitis vinifera L.) grown under differential levels of water deficit with or without a kaolin-based, foliar reflectant particle film**. *J Agric Food Chem* 2010, **58**(24):12890-12898.
98. Degu A, Ayenew B, Cramer GR, Fait A: **Polyphenolic responses of grapevine berries to light, temperature, oxidative stress, abscisic acid and jasmonic acid show specific developmental-dependent degrees of metabolic resilience to perturbation**. *Food Chemistry* 2016, **212**:828-836.
99. Rienth M, Torregrosa L, Luchaire N, Chatbanyong R, Lecourieux D, Kelly MT, Romieu C: **Day and night heat stress trigger**



**different transcriptomic responses in green and ripening grapevine (*vitis vinifera*) fruit. *BMC Plant Biol* 2014, **14**:108.**

100. Bonada M, Sadras VO: **Review: critical appraisal of methods to investigate the effect of temperature on grapevine berry composition. *Australian Journal of Grape and Wine Research* 2015, **21**(1):1-17.**
101. Bock A, Sparks TH, Estrella N, Menzel A: **Climate-Induced Changes in Grapevine Yield and Must Sugar Content in Franconia (Germany) between 1805 and 2010. *PLOS ONE* 2013, **8**(7):e69015.**
102. Petrie PR, Sadras VO: **Advancement of grapevine maturity in Australia between 1993 and 2006: putative causes, magnitude of trends and viticultural consequences. *Australian Journal of Grape and Wine Research* 2008, **14**(1):33-45.**
103. Jones GV, Davis RE: **Climate influences on grapevine phenology, grape composition, and wine production and quality for Bordeaux, France. *American Journal of Enology and Viticulture [print]* 2000, **51**(3):249-261.**
104. Duchêne E, Schneider C: **Grapevine and climatic changes: a glance at the situation in Alsace. *Agron Sustain Dev* 2005, **25**(1):93-99.**
105. Sadras VO, Moran MA: **Elevated temperature decouples anthocyanins and sugars in berries of Shiraz and Cabernet Franc. *Australian Journal of Grape and Wine Research* 2012, **18**(2):115-122.**
106. Buttrose MS, Hale CR, Kliever WM: **Effect of Temperature on the Composition of 'Cabernet Sauvignon' Berries. *American Journal of Enology and Viticulture* 1971, **22**(2):71.**
107. Guillaumie S, Fouquet R, Kappel C, Camps C, Terrier N, Moncomble D, Dunlevy JD, Davies C, Boss PK, Delrot S: **Transcriptional analysis of late ripening stages of grapevine berry. *BMC Plant Biol* 2011, **11**:165.**
108. Zelleke A, Kliever WM: **Influence of Root Temperature and Rootstock on Budbreak, Shoot Growth, and Fruit Composition of Cabernet Sauvignon Grapevines Grown under Controlled Conditions. *American Journal of Enology and Viticulture* 1979, **30**(4):312.**
109. Bergqvist J, Dokoozlian N, Ebisuda N: **Sunlight Exposure and Temperature Effects on Berry Growth and Composition of Cabernet Sauvignon and Grenache in the Central San Joaquin**

**Valley of California.** *American Journal of Enology and Viticulture* 2001, **52**(1):1.

110. Kliewer WM, Dokoozlian NK: **Leaf Area/Crop Weight Ratios of Grapevines: Influence on Fruit Composition and Wine Quality.** *American Journal of Enology and Viticulture* 2005, **56**(2):170.
111. Triolo R, Roby JP, Plaia A, Hilbert G, Buscemi S, Di Lorenzo R, van Leeuwen C: **Hierarchy of Factors Impacting Grape Berry Mass: Separation of Direct and Indirect Effects on Major Berry Metabolites.** *American Journal of Enology and Viticulture* 2018, **69**(2):103.
112. Liu Y, Bassham DC: **Autophagy: pathways for self-eating in plant cells.** *Annu Rev Plant Biol* 2012, **63**:215-237.
113. Destrac-Irvine A, Van Leeuwen C: **The VitAdapt project: extensive phenotyping of a wide range of varieties in order to optimize the use of genetic diversity within the *Vitis vinifera* species as a tool for adaptation to a changing environment.** Villnave D'Ornon, France: Vigne & Vin Publications Internationales; 2017.
114. Ghan R, Van Sluyter SC, Hochberg U, Degu A, Hopper DW, Tillet RL, Schlauch KA, Haynes PA, Fait A, Cramer GR: **Five omic technologies are concordant in differentiating the biochemical characteristics of the berries of five grapevine (*Vitis vinifera* L.) cultivars.** *BMC Genomics* 2015, **16**(1):946.
115. Reid KE, Olsson N, Schlosser J, Peng F, Lund ST: **An optimized grapevine RNA isolation procedure and statistical determination of reference genes for real-time RT-PCR during berry development.** *BMC Plant Biol* 2006, **6**:27.
116. Andrews S: **FastQC.** In. <https://www.bioinformatics.babraham.ac.uk/projects/fastqc/>; 2014.
117. Bolger AM, Lohse M, Usadel B: **Trimmomatic: a flexible trimmer for Illumina sequence data.** *Bioinformatics* 2014, **30**(15):2114-2120.
118. Soneson C, Love MI, Robinson MD: **Differential analyses for RNA-seq: transcript-level estimates improve gene-level inferences.** *F1000Res* 2015, **4**:1521.
119. Langfelder P, Horvath S: **WGCNA: an R package for weighted correlation network analysis.** *BMC Bioinformatics* 2008, **9**:559.
120. Langfelder P, Horvath S: **Fast R Functions for Robust Correlations and Hierarchical Clustering.** *J Stat Softw* 2012, **46**(11).

121. Buchfink B, Xie C, Huson DH: **Fast and sensitive protein alignment using DIAMOND**. *Nature Methods* 2014, **12**:59.
122. **topGO: Enrichment Analysis for Gene Ontology. R package version 2.36.0**. [<http://www.mpi-sb.mpg.de/~alexa>]
123. Jones P, Binns D, Chang HY, Fraser M, Li W, McAnulla C, McWilliam H, Maslen J, Mitchell A, Nuka G, Pesseat S, Quinn AF, Sangrador-Vegas A, Scheremetjew M, Yong SY, Lopez R, Hunter S: **InterProScan 5: genome-scale protein function classification**. *Bioinformatics* 2014, **30**(9):1236-1240.
124. Leinonen R, Sugawara H, Shumway M, International Nucleotide Sequence Database C: **The sequence read archive**. *Nucleic Acids Res* 2011, **39**(Database issue):D19-21.
