1 **A Sense of Place: Transcriptomics Identifies Environmental Signatures**  
2 **in Cabernet Sauvignon Berry Skins in the Late Stages of Ripening.**

3

4 **Grant R. Cramer<sup>1§</sup>, Noé Cochetel<sup>1</sup>, Ryan Ghan<sup>1</sup>, Agnès**  
5 **Destrac-Irvine<sup>2</sup>, and Serge Delrot<sup>2</sup>**

6 <sup>1</sup>Department of Biochemistry and Molecular Biology, University of Nevada,  
7 Reno, Reno, NV 89557, USA

8 <sup>2</sup>UMR Ecophysiology and Grape Functional Genomics, Institut des Sciences  
9 de la Vigne et du Vin, University of Bordeaux, Villenave d'Ornon, France

10

11 <sup>§</sup>Corresponding author

12 Tel: +1 (775) 784-4204, Fax: +1 (775) 784-1419

13

14 Email addresses:

15 GRC: [cramer@unr.edu](mailto:cramer@unr.edu)

16 RG: [rghan@unr.nevada.edu](mailto:rghan@unr.nevada.edu)

17 NC: [noe.cochetel@gmail.com](mailto:noe.cochetel@gmail.com)

18 AD-I: [agnes.destrac-irvine@inra.fr](mailto:agnes.destrac-irvine@inra.fr)

19 SD: [serge.delrot@inra.fr](mailto:serge.delrot@inra.fr)

20

21

1 **Abstract**

2 **Background**

3 Grape berry ripening is influenced by climate, the main component of the  
4 “terroir” of a place. Light and temperature are major factors in the vineyard  
5 that affect berry development and fruit metabolite composition.

6 **Results**

7 To better understand the effect of “place” on transcript abundance during the  
8 late stages of berry ripening, Cabernet Sauvignon berries grown in Bordeaux  
9 and Reno were compared at similar sugar levels (19 to 26 °Brix (total soluble  
10 solids)). Day temperatures were warmer and night temperatures were cooler  
11 in Reno. °Brix was lower in Bordeaux berries compared to Reno at maturity  
12 levels considered optimum for harvest. RNA-Seq analysis identified 5528  
13 differentially expressed genes between Bordeaux and Reno grape skins at  
14 22°Brix. Weighted Gene Coexpression Network Analysis for all expressed  
15 transcripts for all four °Brix levels measured indicated that the majority (75%)  
16 of transcript expression differed significantly between the two locations. Top  
17 gene ontology categories for the common transcript sets were translation,  
18 photosynthesis, DNA metabolism and catabolism. Top gene ontology  
19 categories for the differentially expressed genes at 22°Brix involved  
20 response to stimulus, biosynthesis and response to stress. Some  
21 differentially expressed genes encoded terpene synthases, cell wall  
22 enzymes, kinases, transporters, transcription factors and photoreceptors.  
23 Most circadian clock genes had higher transcript abundance in Bordeaux.  
24 Bordeaux berries had higher transcript abundance with differentially  
25 expressed genes associated with seed dormancy, light, auxin, ethylene

1 signaling, powdery mildew infection, phenylpropanoid, carotenoid and  
2 terpenoid metabolism, whereas Reno berries were enriched with  
3 differentially expressed genes involved in water deprivation, cold response,  
4 ABA signaling and iron homeostasis.

5

## 6 **Conclusions**

7 Transcript abundance profiles in the berry skins at maturity were highly  
8 dynamic. RNA-Seq analysis identified a smaller (25% of total) common core  
9 set of ripening genes that appear not to depend on rootstock, vineyard  
10 management, plant age, soil and climatic conditions. Much of the gene  
11 expression differed between the two locations and could be associated with  
12 multiple differences in environmental conditions that may have affected the  
13 berries in the two locations; some of these genes may be potentially  
14 controlled in different ways by the vinegrower to adjust final berry  
15 composition and reach a desired result.

16

## 17 **Keywords**

18 abiotic stress, biotic stress, grape berry development, RNA-Seq,  
19 transcriptomics, *Vitis vinifera* L.

20

## 21 **Background**

22 *Vitis vinifera* grapevines originated approximately 65 million years ago from  
23 Eurasia and have been cultivated for at least the last 8000 years for its fruits  
24 that are crushed to make wine [1]. Grapevines are now grown throughout the  
25 world in many kinds of environments.

1 Grape berry development is a complex process involving three  
2 developmental phases and multiple hormones [2, 3]. It is in the latter ripening  
3 phase that many compounds involved in flavor and aromas are synthesized,  
4 conjugated or catabolized. Most of these compounds reside in the skin of the  
5 berry and seem to develop in the very last stages of berry development [4-6].  
6 Aroma and flavor are important sensory components of wine. They are  
7 derived from multiple classes of compounds in grapes including important  
8 volatile compounds from the grape and from yeast metabolism during grape  
9 fermentation [5, 6]. Each grape cultivar produces a unique set of volatile and  
10 flavor compounds at varying concentration that represents its wine typicality or  
11 typical cultivar characteristics [6]. Esters and terpenes are volatile compound  
12 chemical classes largely responsible for the fruity and floral aromas in wines  
13 [5, 6]. Esters are largely produced during yeast fermentation from grape-  
14 derived products such as aliphatic alcohols and aldehydes [7, 8]. Grape  
15 lipoxygenases are thought to provide the six carbon precursors from fatty  
16 acids for the synthesis of the fruity aroma, hexyl acetate [8], in yeast during  
17 wine fermentation. Terpenes mostly originate from the grapes and are found  
18 in both the free and bound (glycosylated) forms. Both plant fatty acid and  
19 terpenoid metabolism pathways are very sensitive to the environment [9-13].  
20 Climate has large effects on berry development and composition [14-16].  
21 Besides grape genetics other factors may influence metabolite composition  
22 including the local grape berry microbiome [17], the soil type [15] and the  
23 rootstock [18-22]. While there is evidence that rootstock can affect fruit  
24 composition and transcript abundance, this effect appears to be minor  
25 relative to other environmental factors [18, 19, 21]. Many cultural practices

1 used by the grape grower may directly or indirectly affect the environment  
2 sensed by the grapevine (row orientation, planting density, pruning, leaf  
3 removal, etc.). Temperature and light are major contributors to “terroir”. The  
4 terroir term is used in the wine industry to acknowledge the influence of the  
5 environment on the grapevine and the distinctive characteristics that are  
6 contributed to the typicity of a wine [2, 14, 15, 23]. It includes the biotic,  
7 abiotic and soil environments as well as the viticultural practices. In the  
8 present work, we will use the term “place” to address all of the above except  
9 for the viticultural practices.

10 Recently, a transcriptomic approach was used to elucidate the common  
11 gene subnetworks of the late stages of berry development when grapes are  
12 normally harvested at their peak maturity [4]. One of the major subnetworks  
13 associated with ripening involved autophagy, catabolism, RNA splicing,  
14 proteolysis, chromosome organization and the circadian clock. An integrated  
15 model was constructed to link light sensing with the circadian clock  
16 highlighting the importance of the light environment on berry development. In  
17 this report, in order to get a better understanding of how much of the gene  
18 expression in Cabernet Sauvignon berry skin could be attributed to  
19 environmental influences, we tested the hypothesis that there would be  
20 significant differences in gene expression during the late stages of Cabernet  
21 Sauvignon berry ripening between two widely different locations: one in  
22 Reno, NV, USA (RNO) and the other in Bordeaux, France (BOD). The  
23 analysis revealed a core set of genes that did not depend on location,  
24 climate, vineyard management, grafting and soil properties. Also, the  
25 analysis revealed key genes that are differentially expressed between the

1 two locations and links some of these differences to the effects of  
2 temperature and other environmental factors on aromatic and other quality-  
3 trait-associated pathways. Many gene families were differentially expressed  
4 and may provide useful levers for the vinegrower to adjust berry composition.  
5 Among others, these families encompassed genes involved in amino acid  
6 and phenylpropanoid metabolism, as well as aroma and flavor synthesis.

7

## 8 **Results**

### 9 *Background Data for a “Sense of Place”*

10 To test the hypothesis that the transcript abundance of grape berries during  
11 the late stages of ripening differed in two locations with widely different  
12 environmental conditions, we compared the transcript abundance of grape  
13 berry skins in BOD and RNO. The vineyards were planted in 2004 and 2009  
14 in RNO and BOD, respectively. BOD vines were grafted on to SO4 rootstock  
15 and RNO vines were grown on their own roots. Both BOD and RNO used a  
16 vertical shoot positioning trellis design. The environmental variables between  
17 the two vineyard sites had a number of differences. BOD has a slightly more  
18 northern latitude than RNO; consequently, day lengths were slightly longer in  
19 BOD at the beginning of harvest and slightly shorter at the end of harvest  
20 (Table 1). On the final harvest dates, the day length differed between the two  
21 locations by about 30 min.

22 Average monthly maximum temperatures were warmer in RNO than BOD,  
23 but minimum September temperatures were cooler (Table 1). This made for  
24 an average daily day/night temperature differential of 10°C and 20°C during  
25 the harvest periods for BOD and RNO, respectively. The day temperatures

1 were warmer by about 6°C and the night time temperatures were about 4°C  
2 cooler in RNO.  
3 The RNO site was much drier than the BOD site (Table 1). September  
4 monthly precipitation totals were 65.5 and 2.03 mm and had average relative  
5 humidities of 74 and 34% for BOD and RNO, respectively. The soil at the  
6 BOD site was a gravelly soil with a pH of 6.2 and the soil at the RNO site  
7 was a deep sandy loam with a pH of 6.7. No pathogen, nutrient deficiency or  
8 toxicity symptoms were evident in the vines.

9

#### 10 *Transcriptomics*

11 The analysis of transcript profiles of Cabernet Sauvignon grapes harvested  
12 in RNO in September of 2012 was previously described [4]. Individual berry  
13 skins were separated immediately from the whole berry and the individual  
14 total soluble solids (°Brix) level of the berry, which is mostly composed of  
15 sugars, was determined. Similarly, Cabernet Sauvignon berry skins from  
16 BOD were harvested from the middle of September in 2013 until the end of  
17 the first week of October (Table 1). Berry skins were separated and analyzed  
18 in the same manner as in RNO with the same Illumina technology. Grapes  
19 were harvested at a lower °Brix range in BOD (19.5 to 22.5°Brix) than in  
20 RNO (20 to 26°Brix) because fruit maturity for making wine is typically  
21 reached in the BOD region at a lower sugar level.

22 Transcript abundance of the RNA-Seq reads from both RNO and BOD was  
23 estimated using Salmon software [24] with the assembly and gene model  
24 annotation of Cabernet Sauvignon [25, 26]. The TPM (transcripts per million)  
25 were computed for each gene from each experimental replicate (n = 3) from

1 berry skins at different sugar levels ranging from 19 to 26°Brix (Additional  
2 File 1). Principal component analysis of the transcriptomic data showed clear  
3 grouping of experimental replicates with the largest separation by location  
4 (principal component 1 (PC1) = 51% variance) and then °Brix (principal  
5 component 2 (PC2) = 22% variance) of the berry skin samples (Fig. 1).  
6 To get different perspectives of the data, three approaches were used to  
7 further analyze the transcriptomic data. One focused on expression at one  
8 similar sugar level in both locations. Another identified a common set of  
9 genes whose transcript abundance changed in both locations. And the third  
10 one was a more comprehensive network analysis using all of the sugar  
11 levels and the two locations.  
12 Since sugar levels were not exactly the same between the two locations,  
13 5528 differentially expressed genes (DEGs, at an FDR padj-value < 0.05)  
14 were identified between the two locations in approach 1 at the sugar level  
15 closest to the 22°Brix level (21.5°Brix in BOD vs 22°Brix in RNO) using  
16 DESeq2 [27] (Additional file 2). DEGs will refer to this set of genes  
17 throughout this manuscript. Gene set enrichment analysis with topGO was  
18 determined for these 5528 genes (Additional file 3) and the top gene  
19 ontology (GO) categories for biological processes based on the number of  
20 genes identified were cellular metabolic process (3126 genes, padj-value =  
21 2.3E-03), biosynthetic process (2371 genes, padj-value = 7.7E-09), and  
22 response to stimulus (2324 genes, padj-value = 1.21E-26). Other important  
23 and highly significant categories were response to stress (1514 genes, padj-  
24 value = 5.69E-24) and developmental process (1280 genes, corrected p-  
25 value = 8.09E-12). There were 910 GO categories in total that were



1 significantly enriched (Additional file 3). The relationship between the top 25  
2 GO categories can be seen in Additional file 4. We use the term  
3 “significantly” throughout this text to mean statistically significant at or below  
4 a padj-value of 0.05. Amongst the top stimulus subcategories with the largest  
5 number of genes were response to abiotic stimulus (950 genes; padj-value =  
6 9.1E-29), response to endogenous stimulus (835 genes, padj-value = 1.43E-  
7 21; 256 of which were related to response to abscisic acid), response to  
8 external stimulus (719 genes, padj-value = 1.08E-24), and biotic stimulus  
9 (520 genes, padj-value = 5.29E-22). There were many other environmental  
10 stimuli categories with significant gene set enrichment including response to  
11 light stimulus (234 genes), response to osmotic stress (171 genes), and  
12 response to temperature stimulus (158 genes).

13 In approach 2, we examined which gene expression was changing with °Brix  
14 level in both locations to identify a common set of genes differentially  
15 expressed during berry development with very different environmental  
16 conditions. The significant differences in transcript abundance in each  
17 location was determined with DESeq2 using the lowest °Brix sampling as the  
18 control. For example, the control sample in RNO was the lowest sugar  
19 sampling at 20 °Brix; the transcript abundance of the three higher °Brix  
20 samplings were compared to the transcript abundance of the control. The  
21 genes that had significantly different transcript abundance relative to control  
22 in at least one of the comparisons were identified in RNO and BOD. These  
23 gene lists were compared and the common gene set consisting of 1985  
24 genes for both locations was determined (ap2 tab in Additional file 5).  
25 Comparing this common gene list (ap2) to the DEGs from approach 1

1 identified 907 genes that were common to both sets, indicating that this  
2 subset was differentially expressed between the locations at 22°Brix. The  
3 other 1078 genes did not differ significantly between locations. This 1078  
4 gene subset list can be found in Additional file 5 (ap2-ap1 tab). The GO  
5 categories most enriched in this gene set included response to inorganic  
6 substance, response to abiotic stimulus and drug metabolic process.

7 In approach 3, using a more powerful approach to finely distinguish the  
8 expression data for all sugar levels, Weighted Gene Coexpression Network  
9 Analysis (WGCNA) identified gene sets common to (based upon correlation)  
10 and different gene expression profiles between BOD and RNO. All  
11 expressed genes for all °Brix levels (Additional file 1) were used in this  
12 analysis. Additional details of the analysis are described in the Materials and  
13 Methods section. Twenty-one modules or gene subnetworks were defined  
14 (Additional file 6) and a heat map was generated displaying the module-trait  
15 relationships (Additional file 7). The grey module is not a real module but a  
16 place to put all genes not fitting into a real module; thus, it was not counted  
17 as one of the twenty-one gene modules above. Eight modules had similar  
18 gene expression profiles for BOD and RNO ( $p_{adj}\text{-value} > 0.05$ ); these  
19 included cyan, midnightblue, pink, green yellow, salmon, blue, grey60, and  
20 royalblue. This gene set consisted of 8017 genes (see ap3 tab in Additional  
21 file 5 for the gene list). Comparing this common gene set from the WGCNA  
22 with the DEGs from approach 1 revealed that 524 genes in common were  
23 found in both sets. This subset was removed from the WGCNA to produce a  
24 gene list of 7492 common to both locations and not differing in their  
25 transcript abundance at 22°Brix (ap2-ap1). This represents 25% of the total

1 29,929 genes in all of the modules. This gene set was compared with the  
2 ap2-ap1 gene set from approach 1 and 845 genes were found in common in  
3 both sets. The remainder from ap2-ap1 provided an additional 232 genes to  
4 the common set of genes from ap3-ap1 not affected by location giving a total  
5 number of 7724 genes, representing 25.8% of the genes expressed. This  
6 gene set is listed in ap2-ap1\_union\_ap3-ap1 tab in Additional file 5. The GO  
7 categories most enriched in this gene set included general categories such  
8 as organic substance biosynthetic process and organelle organization. There  
9 were 785 enriched GO categories in total.

10 In approach 3, further analysis of the gene modules using gene set  
11 enrichment analysis was performed with genes that had a kME > 0.80 for  
12 each module in the WGCNA (Additional file 8). The similar gene sets in  
13 common with both locations with decreasing transcript abundance as sugar  
14 levels increased (negative correlation with °Brix) were enriched with the GO  
15 categories involving growth and water transport (blue module), and  
16 translation (grey60 module). The common gene sets with increasing  
17 transcript abundance as sugar levels increased were enriched with the GO  
18 categories involving gene silencing (cyan module), aromatic compound  
19 metabolism (midnight blue), organic substance catabolism (pink module),  
20 and DNA metabolism (salmon).

21 Most modules were positively or negatively correlated with BOD and RNO  
22 berries (e.g. black, yellow, red, turquoise, etc.). The turquoise module was  
23 the largest module and consisted of 5029 genes; it had the most positive and  
24 negative correlations for BOD and RNO, respectively (Additional file 7). This  
25 gene set was similar to the DEGs defined by DESeq2 with the largest

1 differences between BOD and RNO at 22°Brix. Gene set enrichment  
2 analysis of genes within the turquoise module having a kME of 0.80 or higher  
3 (1090 genes) revealed many common GO categories with the DEGs  
4 (Additional file 8); 81% (481 of 594) of the GO categories from the turquoise  
5 module subset were also found in the 910 GO categories of the DEGs (53%  
6 of total). Some of the most enriched GO categories in the turquoise module  
7 were organic acid metabolism, flavonoid metabolism, lipid biosynthesis,  
8 response to abiotic stimulus, isoprenoid metabolism, response to light  
9 stimulus and photosynthesis. The gene expression profiles of this module  
10 declined in transcript abundance with increasing sugar levels (negative  
11 correlation with °Brix).

12 The yellow module was another large module (3008 genes) that was the  
13 second most positively correlated with BOD. This module was highly  
14 enriched with GO categories involving biosynthesis, defense responses and  
15 catabolic processes. The *WRKY75* gene (g104630; this g# term is used as  
16 an abbreviated gene loci name in the Cabernet Sauvignon genome  
17 throughout this paper) was in the top 4 hub genes (kME = 0.97) in the yellow  
18 module (Additional file 6). *WRKY75* is a transcription factor that positively  
19 regulates leaf senescence. It is induced by ethylene, ROS (reactive oxygen  
20 species) and SA (salicylic acid) and is a direct target of EIN3 (ethylene  
21 insensitive 3) [28].

22 The green (2287 genes) and brown (4147 genes) modules were also large  
23 modules that were most positively correlated with RNO (0.92 and 0.9,  
24 respectively). The green module was highly enriched in the GO category

1 involving response to chemical. The brown module was highly enriched in  
2 GO categories involving multiple catabolic processes.  
3 Thus, the WGCNA results, which utilized all of the expressed genes from all  
4 °Brix levels were consistent with the DESeq2 results that only compared  
5 transcript abundances at 22°Brix or between locations. The WGCNA results  
6 were more comprehensive and complemented the results of approaches 1  
7 and 2 by identifying hub genes and gene subnetworks. These subnetworks  
8 were linked and further defined by their highly correlated coexpression  
9 profiles and enriched GOs.

10

### 11 **Transcriptomic profiles dynamically changing with sugar levels**

12 *DEGs with largest increases in transcript abundance between sugar levels*

13 As a first approach to examining the 5528 DEG dataset, differences between  
14 the transcript abundance in berries with the lowest and highest °Brix levels at  
15 the two locations were determined (Additional file 2). Eight examples of the  
16 many DEGs with the largest transcript abundance differences from BOD and  
17 RNO (*EXL2* (exordium like 2, g068700), *HB12* (homeobox 12, g223410),  
18 *BSMT1* (benzoate/salicylate methyltransferase 1, g336810), *HAD* (haloacid  
19 dehalogenase-like hydrolase protein, g070140), *STS24* (stilbene synthase  
20 24, g435870), *NAC073* (NAC domain containing protein 73, g125400),  
21 *TPS35* (terpene synthase 35, g087040), and *MAT3* (methionine  
22 adenosyltransferase 3, g013310)) were selected and are presented in Figure  
23 2. The major point of showing this plot is to highlight the general trends of  
24 continuously increasing transcript abundance with sugar levels for these  
25 genes; half of these genes start at similar transcript abundance levels around

1 20°Brix for both BOD and RNO berries and increase in transcript abundance  
2 at a higher rate in BOD grapes as sugar levels increase. The other half  
3 increased at approximately the same rate for both locations but had higher  
4 amounts at the BOD location at the same sugar levels. These data were  
5 fitted by linear regression to compare the slopes of the lines. The slopes  
6 were significantly higher for *EXL2*, *BSMT1*, *STS24*, and *TPS35* for BOD as  
7 compared to RNO berries, but not for the other four genes (data not shown).  
8 The significantly increased rate of change for transcript abundance in the  
9 BOD berries indicated that the berries in BOD may have ripened at a faster  
10 rate relative to sugar level.  
11 To get deeper insights into these dynamic gene sets from BOD and RNO,  
12 gene set enrichment analysis of the top 400 DEGs with the greatest increase  
13 in transcript abundance from the lowest sugar level to the highest sugar level  
14 was performed for each location. The top 400 DEGs for BOD berries were  
15 highly enriched in biosynthetic processes involving amino acid and  
16 phenylpropanoid metabolism (Additional File 9); defense responses,  
17 response to fungus and response to ethylene stimulus were other highly  
18 enriched categories. The top 400 DEGs for RNO berries were enriched in  
19 response to oxygen-containing compound, response to hormone and  
20 response to abscisic acid (Additional File 10).

21

22 *DEGs with largest decreases in transcript abundance between sugar levels*  
23 Eight examples of DEGs with the greatest decrease in transcript abundance  
24 with increasing sugar levels are presented in Figure 3. They include lipid and  
25 cell wall proteins (e.g. extensin like and lipid transferase proteins) and an

1 aquaporin (TIP1;1, tonoplast intrinsic protein 1;1). The data were fitted to  
2 linear regressions and the slopes statistically compared between BOD and  
3 RNO berries. In some cases, the slopes of the linear regression lines of the  
4 DEGs were not statistically different (bifunctional inhibitor lipid transfer  
5 protein and *DUF642* (domain of unknown function 642); but in the other  
6 cases presented, there were similar amounts of transcript abundance around  
7 20°Brix, but there were significantly different slopes. Again, there is a trend  
8 for the transcript abundance of many of these genes to change more  
9 significantly in BOD berries than RNO berries relative to sugar level.

10

#### 11 *Differences in autophagy genes between BOD and RNO*

12 Berry ripening is a degradative process involving autophagy. As a general  
13 rule, the transcript abundance of genes involved in autophagy increased with  
14 sugar level and had a higher transcript abundance in BOD berries relative to  
15 RNO berries at the same sugar level (Fig. 4), consistent with the hypothesis  
16 that BOD berries ripened faster than RNO berries relative to sugar level.

17

#### 18 ***Aroma- and flavor-associated DEGs***

19 Many aroma and flavor-associated compounds are synthesized in the late  
20 stages of berry ripening and sensitive to the environment. The major  
21 metabolic pathways affecting flavor and aromas in grapes and wines include  
22 the terpenoid, carotenoid, amino acid, and phenylpropanoid pathways [6].  
23 These pathways were identified by topGO to be highly enriched in the DEGs  
24 and the turquoise module. Some of the DEGs are involved in these  
25 pathways and will be presented in the following subsections.

1

2 *Terpene synthase genes with the greatest transcript abundance differences*  
3 *between BOD and RNO*

4 Cultivar differences in berries are often ascribed to differences in aroma  
5 compounds. One of the main classes of cultivar specific aroma compounds  
6 is the terpene group [29]. The transcript abundance of a number of terpene  
7 synthases were higher in BOD berries as compared to RNO berries (Fig. 5).  
8 All but one of these (terpene synthase 55; *TPS55*) increased in transcript  
9 abundance with increasing sugar levels. *TPS35* is a  $\beta$ -ocimene synthase ( $\beta$ -  
10 ocimene is a main component of snapdragon flower aroma [30]). *TPS08* is a  
11  $\gamma$ -cadinene synthase, *TPS26* is a cubebol/ $\delta$ -cadinene synthase, *TPS4* and  
12 10 are (E)- $\alpha$ -bergamotene synthases, and *TPS07* and 28 are germacrene-D  
13 synthases; these enzymes produce sesquiterpenes found in essential plant  
14 oils (see [29] and references therein for the function of all of these terpenoid  
15 genes). *TPS55* is a linalool/nerolidol synthase which synthesizes acyclic  
16 terpene alcohols; linalool contributes significantly to the floral aromas of  
17 grape berries and wines. *TPS68* is a copalyl diphosphate synthase involved  
18 in diterpenoid biosynthesis and *TPS69* is an ent-kaurene synthase. Both  
19 *TPS68* and 69 are diterpene synthases and are part of the ent-kaurene  
20 biosynthesis pathway.

21

22 *Other terpenoid and carotenoid metabolism-related genes*

23 Carotenoid metabolism is another biosynthetic pathway that contributes to  
24 flavor and aroma in grapes [31]. There are a number of key genes that



1 contribute to terpenoid and carotenoid metabolism that have a higher  
2 transcript abundance (Additional file 2) in BOD berries as compared to RNO  
3 berries. For example, DXR (1-deoxy-D-xylulose 5-phosphate  
4 reductoisomerase, g360850) catalyzes the first committed step and HDS (4-  
5 hydroxy-3-methylbut-2-en-1-yl diphosphate synthase; g379980) enzyme  
6 controls the penultimate steps of the biosynthesis of isopentenyl diphosphate  
7 (IPP) and dimethylallyl diphosphate (DMAPP) via the methylerythritol 4-  
8 phosphate (MEP) pathway. Other examples are two phytoene synthases  
9 (PSY), g180070 and g493850); PSY is the rate-limiting enzyme in the  
10 carotenoid biosynthetic pathway.

11

#### 12 *Amino acid and phenylpropanoid metabolism genes*

13 Amino acids contribute to the aroma and flavor of grapes and wines [7]. The  
14 amino acid metabolism functional GO category is highly enriched in the  
15 group of DEGs between BOD and RNO (Additional file 3) and more  
16 specifically in the top 400 BOD DEGs (Additional file 9). Some examples of  
17 genes involved in amino acid metabolism that have a higher transcript  
18 abundance in BOD berries (see Fig. 6) are phenylalanine ammonia lyase 1  
19 (*PAL1*, g533070 and eight other paralogs can be found in Additional file 2),  
20 which catalyzes the first step in phenylpropanoid biosynthesis, branched-  
21 chain-amino-acid aminotransferase 5 (*BCAT5*, g220210), which is involved  
22 in isoleucine, leucine and valine biosynthesis, 3-deoxy-D-arabino-  
23 heptulosonate 7-phosphate synthase 1 (*DHS1*, g082490), which catalyzes  
24 the first committed step in aromatic amino acid biosynthesis), and tyrosine  
25 aminotransferase 7 (*TAT7*; g116950), which is involved in tyrosine and

1 phenylalanine metabolism. Included in this group were 44 stilbene synthases  
2 (*STS*), which are part of the phenylpropanoid pathway; these *STS*s had a  
3 higher transcript abundance in BOD berries as compared to RNO berries,  
4 with very similar transcript abundance profiles to *PAL 1* (see Additional file 11  
5 for two typical examples).

6

### 7 ***DEGs associated with abiotic stimuli***

#### 8 *Light-responsive genes*

9 In a previous analysis, WGCNA defined a circadian clock subnetwork that  
10 was highly connected to transcript abundance profiles in late ripening  
11 grapevine berries [4]. To compare the response of the circadian clock in the  
12 two different locations, we plotted all of the genes of the model made earlier  
13 [4]. Most core clock genes (Additional file 12) and light sensing and  
14 peripheral clock genes (Additional file 13) had significantly different transcript  
15 abundance in BOD berries than that in RNO berries at the same sugar level  
16 (profiles bracketed in a red box). All but one of these (*PHYC*, phytochrome  
17 C, g088040) had higher transcript abundance in BOD berries relative to RNO  
18 berries. The transcript abundance of other genes had nearly identical profiles  
19 (not bracketed in a red box). These data are summarized in a simplified  
20 clock model (Fig. 7), which integrates *PHYB* as a key photoreceptor and  
21 temperature sensor [32, 33] that can regulate the entrainment and  
22 rhythmicity of the core circadian clock, although to be clear it is the protein  
23 activity of *PHYB*, not the transcript abundance that is regulating the clock.

24

#### 25 *Chilling-responsive genes*

1 Temperatures were colder in RNO than BOD, reaching chilling temperatures  
2 in the early morning hours. A number of previously identified chilling-  
3 responsive genes [34] in Cabernet Sauvignon had a higher transcript  
4 abundance in RNO berries as compared to BOD berries (Fig. 8). These  
5 genes included *CBF1* (C-repeat/DRE binding factor 1, g435450; previously  
6 named *CBF4*, but renamed to be consistent with the ortholog of  
7 *Arabidopsis*), a transcription factor that regulates the cold stress regulon [35],  
8 *IDD14* (Indeterminate-Domain 14, g000790), a transcription factor that  
9 generates an inhibitor to regulate starch metabolism [36], *CML41*  
10 (calmodulin-like 41, g041290), that encodes a calmodulin-like protein, *CYSB*  
11 (cystatin B, g023260), a cysteine proteinase inhibitor that confers cold  
12 tolerance when overexpressed [37], *XTH23* (xyloglucan  
13 endotransglucosylase/hydrolase 23, g572510), that encodes a cell wall  
14 loosening enzyme, and *SULTR3;4* (sulfate transporter 3;4, g392710).

15

#### 16 ***DEGs associated with biotic stimuli***

17 The top DEGs in BOD berries were highly enriched in biotic stimuli genes.  
18 Some of these genes included pathogenesis proteins (*PR*); these genes had  
19 higher transcript abundance in BOD berry skins relative to RNO berries (Fig.  
20 9). The transcript abundance of *PR10* (g212910) increased with the sugar  
21 level. The transcript abundance of this *PR10* gene increases in response to  
22 powdery mildew (*Erysiphe necator*) inoculation in Cabernet Sauvignon  
23 leaves [38]. Furthermore, many other genes induced by powdery mildew  
24 were also at much higher transcript abundance levels in BOD berries. These  
25 included a PR3 protein that is a class IV chitinase, a thaumatin-like protein

1 (PR5) and a number of the stilbene synthases mentioned in the  
2 phenylpropanoid metabolism section above (see Additional file 11). *MLA10*  
3 (Intracellular Mildew A 10, g343420; Affymetrix probe set 1615715\_at in [38])  
4 matches to a fungal protein from *E. necator* and was used as a control probe  
5 set for the presence of powdery mildew [38]. g343420 had a much higher  
6 transcript abundance in BOD berries than that in RNO berries. These data  
7 indicate that powdery mildew infection may have been higher in BOD berries  
8 and that this infection may induce some of the phenylpropanoid pathway as  
9 well.

10

### 11 ***DEGs associated with hormonal stimuli***

#### 12 *Auxin signaling genes*

13 Auxin transport (38 genes; padj-value = 4.43E-08) and cellular response to  
14 auxin stimulus (45 genes, padj-value = 9.12E-05) were highly enriched GO  
15 categories for the DEGs (Additional file 3). Auxin is known to have multiple  
16 effects on grape berry ripening [39, 40]. Auxin can delay berry ripening at the  
17 veraison stage, which is at the beginning of berry ripening. Some auxin  
18 metabolism (*GH3.1*; GH3 family protein, g538930) and signaling genes such  
19 as *IAA13* (indole acetic acid 13, g527400), *IAA27* (g326620), and *ARF5*  
20 (auxin-response factor, g075570) had a higher transcript abundance in RNO  
21 berries (Additional file 1). Other auxin metabolism (*GH3.6*, *JAR1* (jasmonate  
22 resistant 1), g170030) and auxin signaling genes had a higher transcript  
23 abundance in BOD including *ARF2* (g469780), *ARF8* (g180460), *ARF11*  
24 (g380160), *IAA16* (g318830), *ARAC1* (Arabidopsis RAC-like 1, g320970),

1 and *GID1B* (gibberellic acid insensitive dwarf1B, g071190), a gibberellin  
2 receptor (Additional file 1).  
3  
4 *ABA metabolism and signaling genes*  
5 ABA is a stress hormone that responds to water deficits in grapevine [41]. A  
6 number of ABA-related genes are differentially expressed in berry skins  
7 between the two locations (Additional file 14). *NCED3* (nine-cis  
8 epoxy-carotenoid dioxygenase 3, g221190) and *NCED5* (g404590), which  
9 are responsive to water deficit [42, 43], had higher transcript abundance in  
10 RNO and *NCED6* (g203160), which is highly expressed in embryos [42], had  
11 higher transcript abundance in BOD. *NCED6*, but not *NCED3* is involved in  
12 seed ABA and seed dormancy [43]. Additionally a number of other genes  
13 involved in the ABA signaling pathway had higher transcript abundance in  
14 BOD including *ABF2* (abscisic acid responsive elements binding factor 2,  
15 g286950), *ABF4* (g312300) and *ABCG40* (adenosine triphosphate binding  
16 cassette G 40, g143240) [44, 45]. Interestingly, *BAM1* (Barley Any Meristem  
17 1) was identified to be the receptor to a root signaling peptide hormone  
18 (*CLE25*, *clavata3/esr-related 25*) that responds to water deficit and  
19 upregulates *NCED3* transcript abundance in Arabidopsis leaves [46]. The  
20 transcript abundance of *BAM1* (g220020) was significantly higher in RNO  
21 berries than that of BOD berries (Additional File 14). There were no  
22 significant differences in the transcript abundance of *CLE25* (g007470); it  
23 was highly variable.  
24  
25 *Ethylene signaling genes higher in BOD*

1 There were 71 DEGs that were enriched in the response to ethylene GO  
2 category (Additional file 3). Ethylene is a stress hormone that responds to  
3 many types of biotic [47] and abiotic [48] stresses in addition to its role in fruit  
4 development and ripening [49]. Many ethylene-related genes had a higher  
5 transcript abundance in BOD berries. These included ethylene biosynthesis,  
6 ethylene receptors and ERF (ethylene response factor) transcription factors  
7 (Fig. 10). ERF1 and ERF2 are at the beginning of the ethylene signaling  
8 pathway and are direct targets of EIN3 [45, 50]. Other ERF transcription  
9 factors (e.g. *ERF98*; g156210) identified as hubs in the ethylene signaling  
10 pathway in Arabidopsis leaves [51] were also differentially expressed in a  
11 similar manner as *ERF1* (g060690) and *ERF2* (g482650) between the two  
12 locations (data not shown).

13

#### 14 ***DEGs associated with mineral nutrients***

##### 15 *Iron-related genes*

16 Fourteen DEGs were associated with genes enriched in response to iron ion  
17 (Additional file 3); Eight examples of DEGs involved in iron homeostasis are  
18 shown in Figure 11. Iron homeostasis genes *SIA1* (salt-induced ABC kinase,  
19 g336700), *VIT1* (vacuolar iron transporter 1, g001160), *ATH13* (Arabidopsis  
20 thaliana ABC2 homolog 13, g146610), *IREG3* (iron regulated 3, g098530),  
21 *and ABCI8* (ATP-binding cassette I8, g163790) have higher transcript  
22 abundance in BOD berries than in RNO berries. Iron homeostasis genes  
23 *YSL3* (yellow stripe-like 3, g223320), *FER1* (ferritin 1, g606560), and  
24 *NRAMP3* (natural resistance-associated macrophage protein 3, g413920)  
25 had higher transcript abundance in RNO berries compared to BOD berries.

1 Several other ferritin genes were expressed similarly to *FER1* (data not  
2 shown). Average available iron soil concentrations were about 5 times higher  
3 in the BOD vineyard soil compared to the RNO vineyard soil (Table 1).

4

## 5 **Discussion**

6 The common gene set (ap2-ap1\_union\_ap3-ap1) for both locations  
7 represented approximately 25% of the genes differentially expressed with  
8 sugar level or location. Presumably these gene sets represent genes that  
9 were not influenced by location (environment) but were influenced by berry  
10 development or sugar level. As more locations are compared in the future,  
11 these gene sets will likely be reduced in size even further. The processes  
12 involved in these gene sets or modules included the increase of catabolism  
13 and the decline of translation and photosynthesis. It is clear that these  
14 processes play important roles in berry ripening. Most of the genes in the  
15 genome varied in transcript abundance with increasing sugar levels and  
16 berry maturation and most of these varied with the vineyard site. Many of the  
17 DEGs were enriched with gene ontologies associated with environmental or  
18 hormonal stimuli.

19

20 *DEG expression profiles of grape berry skins were associated with*  
21 *environmental factors and seed development*

22 Plants are exposed to a multitude of factors that influence their physiology  
23 even in controlled agricultural fields such as vineyards. The vineyards in  
24 BOD and RNO are exposed to very different environments; these

1 environmental influences were reflected in some of the DEG sets with  
2 enriched gene ontologies. Our data are consistent with the hypothesis that  
3 transcriptomic dynamics in the late stages of berry ripening are sensitive to  
4 local environmental influences on the grapevine.

5 While most transcript abundances in berries are largely influenced by  
6 genetics or genotype, environment also plays a large role [2]. It is impossible  
7 with the experimental design of this study to determine the amount that each  
8 of the environmental factors contributed to the amount of differential  
9 expression in these two locations. There were too many variables and too  
10 many potential interactions to determine anything conclusively. All we can  
11 say is that these genes were differentially expressed between the two  
12 locations, which were likely due to known and unknown factors (a sense of  
13 place or terroir).

14 In this study we compared two different clones of Cabernet Sauvignon, one  
15 on rootstock and the other on its own roots. There were likely to be some  
16 effects on the transcript abundance in the berries between these grapevines  
17 as a result of the genetic differences between their roots and their clonal  
18 shoots/scions. Not knowing what these genes might be from previous  
19 studies prevents us from drawing any clues. These and other factors most  
20 certainly affected the berries to some degree. However, our data indicated  
21 that grape berry skins also were responsive to a multitude of potential  
22 environmental factors in the two vineyard locations and possibly from signals  
23 coming from the maturing seed. We say potential environmental factors  
24 because we did not control for these factors; we associated transcript  
25 abundance with the factors that were different in the two locations. The



1 transcript abundance profiles along with functional annotation of the genes  
2 gave us clues to factors that were influencing the berries and then  
3 associations were made with the known environmental variables. Further  
4 experiments are required to follow up on these observations.  
5 The environmental factors that we were able to associate with differences in  
6 transcript abundance (DEGs) between the two locations included air  
7 temperatures, light, moisture (rainfall and relative humidity) and biotic stress.  
8 These factors in turn were associated with transcript abundance involved  
9 with physiological responses and berry traits such as seed and embryo  
10 development, hormone signaling (ABA, ethylene and auxin),  
11 phenylpropanoid metabolism, and the circadian clock. In the following  
12 sections we discuss in more detail some of the possible environmental  
13 factors that were reflected in the enriched gene ontologies found in the gene  
14 sets from this study.

15

#### 16 *Transcript abundance of light-responsive genes*

17 Light regulates the transcript abundance of many genes in plants. It has  
18 been estimated that 20% of the plant transcriptome is regulated by white  
19 light and this includes genes from most metabolic pathways [52]. Light is  
20 sensed by a variety of photoreceptors in plants [33]; there are red/far red,  
21 blue and UV light receptors. PHYB is a key light sensor, regulating most of  
22 the light sensitive genes [53] and sensing the environment through red light  
23 to far-red light ratios and temperature [33, 54]. PHYB entrains the circadian  
24 clock affecting the rate of the daily cycle [55] and the expression of many the  
25 circadian clock genes [53]; PHYB induces morning phase genes and

1 represses evening phase genes. Other photoreceptors can entrain the  
2 circadian clock as well [33].

3 PHYB and the circadian clock are central regulators of many aspects of plant  
4 development including seed germination, seedling growth, and flowering [33,  
5 55, 56]. The circadian clock influences the daily transcript abundance of  
6 genes involved in photosynthesis, sugar transport and metabolism, biotic  
7 and abiotic stress, even iron homeostasis [55].

8 Light signaling was very dynamic in the berry skin transcriptome in the late  
9 stages of berry ripening with a higher transcript abundance of many light  
10 signaling genes in BOD berries. Many photoreceptors that interact with the  
11 circadian clock had a higher gene expression in BOD berries. In the  
12 circadian clock model, Circadian Clock Associated 1 (*CCA1*) is an early  
13 morning gene and has its highest expression at the beginning of the day. It is  
14 at the start of the circadian core clock progression through the day, whereas  
15 the transcript abundance of Timing Of CAB Expression 1 (*TOC1*) is highest  
16 at the end of the day and finishes the core clock progression (Fig. 7). In both  
17 of these cases, there is a higher transcript abundance of these genes in  
18 BOD than in RNO.

19 The evening complex is a multi-protein complex composed of Early  
20 Flowering 3 (*ELF3*), Early Flowering 4 (*ELF4*) and Phytoclock 1 (*PCL1* also  
21 known as *LUX*) that peaks at dusk. None of these proteins, had significant  
22 differences in transcript abundance between the two locations (Fig. 7;  
23 Additional file 12). The transcript abundance of *ELF3* increased with sugar  
24 level and shortening of the day length (the higher sugar level comes later in  
25 the season and thus is at a shorter day length). *ELF3*, as part of the evening

1 complex (EC), has direct physical interactions with PHYB, COP1  
2 (Constitutive Photomorphogenic 1) and TOC1 [57] linking light and  
3 temperature signaling pathways directly with the circadian clock. It is  
4 interesting that most of the components of the clock showed significant  
5 differences in transcript abundance between BOD and RNO, except for the  
6 three proteins that make up the evening clock.

7 The transcript abundance profile of *PHYB* was similar in both BOD and RNO  
8 berries (Fig. 7), however the changes in transcript abundance with sugar  
9 level occurred in BOD berries at a lower sugar level. There was a gradual  
10 decline of *PHYB* transcript abundance with increasing sugar level until the  
11 last measurement at the fully mature stage, where there was a large  
12 increase in transcript abundance. A very similar profile is observed for  
13 Reveille 1 (*RVE1*). *RVE1* promotes seed dormancy in Arabidopsis and  
14 *PHYB* interacts with *RVE1* by inhibiting its expression [58]. *PIF7*  
15 (Phytochrome Interacting Factor 7), interacts directly with *PHYB* to suppress  
16 *PHYB* protein levels [59]. Likewise, *PIF7* activity is regulated by the circadian  
17 clock [60]. *PIF7* had higher transcript abundance in the BOD than that of  
18 RNO berries and generally increased with increasing sugar level. The  
19 transcript abundance of two of the other grape phytochromes (*PHYA* and  
20 *PHYE*) did not vary significantly between the two locations or at different  
21 sugar levels. *PHYC* had a higher transcript abundance in RNO berries and  
22 did not change much with different sugar levels. Many other light receptors  
23 (e.g. *CRY3* (cryptochrome 3), *FAR1* (far-red impaired response 1), *FRS5*  
24 (*FAR1*-related sequence 5), etc.) had higher transcript abundance in BOD

1 berries (Additional file 13). Thus, light sensing through the circadian clock is  
2 a complicated process with multiple inputs.

3 RVE1 follows a circadian rhythm [61]. It behaves like a morning-phased  
4 transcription factor and binds to the EE element, but it is not clear if it is  
5 affected directly by the core clock (e.g. TOC1 or EC which repress other  
6 morning gene paralogs like *CCA1* and *LHY* (late elongated hypocotyl)) or  
7 through effects of PHYB or both. PHYB downregulates RVE1; RVE1  
8 promotes auxin concentrations and decreases gibberellin (GA)  
9 concentrations [58]. Warmer night temperatures (as in BOD) cause more  
10 rapid reversion of the active form of PHYB to the inactive form [33] and thus  
11 may promote a higher expression/activity of RVE1. P<sub>r</sub> (phytochrome in the  
12 red form, which is the physiologically inactive form) appears to accelerate the  
13 pace of the clock [55]. It is unclear what role phytochromes might have in  
14 seed and fruit development in grapes.

15 Very little is known about the effect of PHY on fruit development in general.  
16 In one tomato study, the fruit development of *phy* mutants was accelerated  
17 [62], suggesting that PHYB as a temperature/light sensor and a regulator of  
18 the circadian clock may influence fruit development. Carotenoid  
19 concentrations, but not sugar concentrations, also were affected in these  
20 mutants.

21 Photoperiod affects the transcript abundance of *PHYA* and *PHYB* in grape  
22 leaves [63]. In the present study, the transcript abundance of the majority of  
23 the photoreceptor genes in berry skins, including red, blue and UV light  
24 photoreceptors, had a higher transcript abundance in BOD berries  
25 (Additional file 13). It is unclear what the effect of PHYB and the circadian

1 clock have on grape berry development. However, there were clear  
2 differences between the two locations; it seems likely that PHYB and the  
3 circadian clock are key grape berry sensors of the environment, affecting  
4 fruit development and composition.

5

#### 6 *Transcript abundance of temperature-responsive genes*

7 The grape berry transcriptome is sensitive to temperature [2, 3].

8 Temperature related genes were differentially expressed at the two locations  
9 in our study. The RNO berries were exposed to a much larger temperature  
10 differential between day and night than BOD berries and were also exposed  
11 to chilling temperatures in the early morning hours during the late stages of  
12 berry ripening (Table 1). The transcript abundance of some cold-responsive  
13 genes was higher in RNO berry skins than in BOD berry skins (Fig. 8),  
14 including *CBF1*.

15 *CBF1* transcript abundance is very sensitive to chilling temperatures; it is a  
16 master regulator of the cold regulon and improves plant cold tolerance [35,  
17 64, 65]. *PIF7* binds to the promoter of *CBF1*, inhibiting *CBF1* transcript  
18 abundance, linking phytochrome, the circadian clock and *CBF1* expression  
19 [60]. Our data are consistent with this model; transcript abundance of *PIF7*  
20 was higher and *CBF1* transcript abundance was lower in BOD berry skins  
21 than RNO berry skins (Fig. 7 and 7).

22

#### 23 *Transcript abundance of dehydration and seed dormancy genes*

24 ABA concentrations in plants increase in response to dehydration and ABA  
25 triggers a major signaling pathway involved in osmotic stress responses and

1 seed development [66]. ABA concentrations only increase in the seed  
2 embryo near the end of seed development when the embryo dehydrates and  
3 goes into dormancy. ABA concentrations remain high to inhibit seed  
4 germination. The transcript abundance of ABA signaling genes such as  
5 *ABF2* and *SnRK2* (SNF1 related protein kinase 2) kinases increase after  
6 application of ABA to cell culture [67] and in response to dehydration [45] in  
7 leaves of Cabernet Sauvignon.

8 The data in this study are consistent with the hypothesis that BOD berries  
9 are riper at lower sugar levels. The ABA signaling genes in the berry skins  
10 had higher transcript abundance in BOD berries indicating that ABA  
11 concentrations were higher in BOD than RNO berries even though RNO  
12 berries were exposed to drier conditions (Table 1). ABA concentrations may  
13 be higher in the BOD berry skins based upon the higher transcript  
14 abundance of important ABA signaling and biosynthesis genes encoding  
15 *ABF2*, *SnRK2* kinases and *NCED6*. We hypothesize that this would be seed  
16 derived ABA since water deficits were not apparent in BOD with the recent  
17 rainfall and high humidity. In contrast, *NCED3* and *NCED5* had higher  
18 transcript abundance in RNO berry skins, which might occur as the result of  
19 the very low humidity and large vapor pressure deficit (the vines were  
20 irrigated). The lower expression of *NCED6* in RNO berry skins may indicate  
21 that the seeds in the berry were more immature than the BOD berries. The  
22 higher expression of other seed development and dormancy genes (e.g.  
23 *RVE1*, *ARF2*, *ARF10*, etc.) in the berry skins support the argument that BOD  
24 berries (and seeds) matured at a lower sugar level than the RNO berries.

1 The ABA concentrations in the berry skins are a function of biosynthesis,  
2 catabolism, conjugation and transport. ABA in seeds increase as the seed  
3 matures and some of this ABA may be transported to the skin. In fact, a  
4 number of *ABCG40* genes, which encode ABA transporters, had higher  
5 transcript abundance in BOD berry skins than that in RNO (Additional file 2  
6 and 14). Part of the ABA in skins may be transported from the seed and part  
7 of it might be derived from biosynthesis in the skins. *NCED6* transcript  
8 abundance in the skins was higher in BOD berries. Perhaps the transcript  
9 abundance of *NCED6* in the skin is regulated by the same signals as the  
10 embryo and reflects an increase in seed maturity. *AtNCED6* transcript  
11 abundance is not responsive to water deficit in *Arabidopsis*, but *AtNCED3*  
12 and *AtNCED5* are [43]. This is consistent with the higher *NCED3*, *NCED5*  
13 and *BAM1* transcript abundance in RNO berries (Additional file 14). Thus,  
14 there are complex responses of ABA metabolism and signaling. It would  
15 appear that there may be two different ABA pathways affecting ABA  
16 concentrations and signaling: one involved with embryo development and  
17 one involved with the water status in the skins.

18 Auxin is also involved with ABA signaling during the late stages of embryo  
19 development in the seeds. Auxin signaling responses are complex. ABF5 is  
20 an auxin receptor that degrades Aux/IAA proteins, which are repressors of  
21 ARF transcriptional activity [68]. Thus, a rise in auxin concentration releases  
22 Aux/IAA repression of ARF transcription factors, activating auxin signaling. In  
23 the berry skins, there was a diversity of transcriptional responses of *Aux/IAA*  
24 and *ARF* genes in the two locations, some with increased transcript  
25 abundance and others with decreased transcript abundance. As with ABA

1 signaling, there may be multiple auxin signaling pathways operating  
2 simultaneously.  
3 One pathway appears to involve seed dormancy. *ARF2* had a higher  
4 transcript abundance in BOD berries. *ARF2* promotes dormancy through the  
5 ABA signaling pathway [69]. This is consistent with the hypothesis that BOD  
6 berries reach maturity at a lower sugar level than RNO berries.

7

#### 8 *Transcript abundance of biotic stress genes*

9 Grapevines have very dynamic gene expression responses to pathogens  
10 [70, 71]. The top 150 DEGs for BOD berries were highly enriched with biotic  
11 stress genes. The higher rainfall and high relative humidity in BOD would  
12 make moist conditions suitable for pathogenic fungi to grow. We detected a  
13 much higher transcript abundance of powdery mildew-responsive genes in  
14 BOD berries and this may be connected to a higher transcript abundance of  
15 ethylene and phenylpropanoid genes as part of a defense response. The  
16 transcript abundance profiles of some of these genes (e.g. *PR10*, *PAL1*,  
17 *STS10*, *ACS6*, and *ERF2*; see Figs. 5, 8, 9 and Additional file 11) are  
18 remarkably similar.

19 Increased ethylene signaling in grapevines has been associated with  
20 powdery mildew infection and phenylpropanoid metabolism and appears to  
21 provide plant protection against the fungus [72, 73]. Genes involved with  
22 phenylpropanoid metabolism, especially *PAL* and *STS* genes, appear to be  
23 quite sensitive to multiple stresses in the environment [74]. In *Arabidopsis*  
24 there are four *PAL* genes [75]. These *PAL* genes appear to be involved with  
25 flavonoid biosynthesis and pathogen resistance in *Arabidopsis*. Ten different



1 *PAL1* and two *PAL2* orthologs had higher transcript abundance in BOD berry  
2 skins; many *STS* genes also had a higher transcript abundance in BOD  
3 berry skins (Additional file 11). Stilbenes are phytoalexins and provide  
4 pathogen resistance in grapes and *STS* genes are strongly induced by  
5 pathogens [70]. Thus, the higher transcript abundance of powdery mildew  
6 genes may be associated with the higher transcript abundance of genes in  
7 the ethylene and phenylpropanoid pathways.

8

#### 9 *Transcript abundance of iron homeostasis genes*

10 The transcript abundance of a number of iron homeostasis genes were  
11 significantly different in the two locations (Fig. 11) and there was a difference  
12 in soil available iron concentrations in the two locations. However, iron  
13 uptake and transport in plants is complicated depending on multiple factors,  
14 such as pH, soil redox state, organic matter composition, solubility in the  
15 phloem, etc. Thus, it is impossible to predict iron concentrations in the berry  
16 without direct measurements. The roles of these genes in iron homeostasis  
17 and plant physiological functions are diverse. Iron supply can affect  
18 anthocyanin concentrations and the transcript abundance of genes in the  
19 phenylpropanoid pathway in Cabernet Sauvignon berry skins [76]. One of  
20 the DEGs, *SIA1*, is located in the chloroplast in Arabidopsis and appears to  
21 function in plastoglobule formation and iron homeostasis signaling in concert  
22 with *ATH13* (also known as *OSA1*) [77]. Another DEG, *YSL3*, is involved in  
23 iron transport [78]. It acts in the SA signaling pathway and appears to be  
24 involved in defense responses to pathogens. It also functions in iron  
25 transport into seeds [79]. *FER1* is one of a family of ferritins (iron-binding

1 proteins) found in Arabidopsis [80]. VIT1 and NRAMP3 are vacuolar iron  
2 transporters [81] and are also involved in iron storage in seeds. Other DEGs  
3 are also responsive to iron supply. *IREG3* (also known as *MAR1*) appears to  
4 be involved in iron transport in plastids; its transcript abundance increases  
5 with increasing iron concentrations [82]. *ABC18* is an iron-stimulated ATPase  
6 located in the chloroplast that functions in iron homeostasis [83].  
7 It is unclear what specific roles these iron homeostasis genes are playing in  
8 grape berry skins, but they appear to be involved in iron storage in seeds  
9 and protection against oxidative stress responses [80, 81]. One possible  
10 explanation for the transcript abundance profiles in the BOD and RNO berry  
11 skins is that ferritins are known to bind iron and are thought to reduce the  
12 free iron concentrations in the chloroplast, thus, reducing ROS production  
13 that is caused by the Fenton reaction [80]. As chloroplasts senesce during  
14 berry ripening, iron concentrations may rise as a result of the catabolism of  
15 iron-containing proteins in the thylakoid membranes; thus, berry skins may  
16 need higher concentrations of ferritins to keep free iron concentrations low.  
17 This might explain the increase in ferritin transcript abundance with  
18 increasing sugar levels.  
19 Most soils contain 2 to 5% iron including available and unavailable iron; soils  
20 with 15 and 25  $\mu\text{g g}^{-1}$  of available iron are considered moderate for  
21 grapevines [84], but soils with higher concentrations are not considered  
22 toxic. Therefore, for both soils in this study, iron concentrations can be  
23 considered to be very high but not toxic. The higher available iron  
24 concentrations in the BOD vineyard may be associated with the wetter  
25 conditions (more reductive conditions) and the lower soil pH.

1

2 *Environmental influences on transcript abundance in other studies*

3 Other researchers using Omics approaches have identified environmental  
4 factors that influence grape berry transcript abundance and metabolites. One  
5 study investigated the differences in transcript abundance in berries of  
6 Corvina (a black-skinned grape cultivar that makes red wine) in 11 different  
7 vineyards within the same region over three years [85]. They determined that  
8 approximately 18% of the berry transcript abundance was affected by the  
9 environment. Climate had an overwhelming effect but viticultural practices  
10 were also significant. Phenylpropanoid metabolism was very sensitive to the  
11 environment and *PAL* transcript abundance was associated with *STS*  
12 transcript abundance.

13 In another study of a white grape cultivar, Garganega, berries were analyzed  
14 by transcriptomic and metabolomic approaches [86]. Berries were selected  
15 from vineyards at different altitudes and soil types. Again, phenylpropanoid  
16 metabolism was strongly influenced by the environment. Carotenoid and  
17 terpenoid metabolism were influenced as well.

18 Two studies investigated the grape berry transcriptomes during the ripening  
19 phase in two different regions of China, a dry region in Western China and a  
20 wet region in Eastern China [87, 88]. These two locations mirror some of the  
21 differences in our conditions in our study, namely moisture, light and  
22 elevation, although the dry China western region has higher night  
23 temperatures and more rainfall than the very dry RNO location. In the  
24 Cabernet Sauvignon study [87], they compared the berry transcriptomes  
25 (with seeds removed) from the two regions at three different stages: pea

1 size, veraison and maturity. The TSS at maturity was slightly below 20°Brix.  
2 Similar to our study, the response to stimulus, phenylpropanoid and  
3 diterpenoid metabolism GO categories were highly enriched in mature  
4 berries between the two locations. Differences in the transcript abundance  
5 of NCED and PR proteins were also noted. Like in our study, the authors  
6 associated the transcript abundance of these proteins to the dry (drought  
7 response) and wet (pathogen defense) locations, respectively.  
8 In the second study comparing these two regions in China [88], the effects of  
9 the environment on the metabolome and transcriptome of Muscat Blanc à  
10 Petits Grains berries were investigated over two seasons; specifically,  
11 terpenoid metabolism was targeted. Like in our study, the transcripts in  
12 terpenoid were in higher abundance in the wetter location. The transcript  
13 abundances were correlated with terpenoid concentrations and a  
14 coexpression network was constructed. A specific set of candidate regulatory  
15 genes were identified including some terpene synthases (TPS14), glycosyl  
16 transferases and 1-hydroxy-2-methyl-2-butenyl 4-diphosphate reductase  
17 (HDR). We examined the transcript abundance of some of these candidate  
18 genes in our own data but did not find significant differences between our  
19 two locations. The contrasting results between our study and Wen et al.  
20 (2015) could be for a variety of reasons such as different cultivar responses,  
21 berry versus skin samples, or different environmental conditions that affect  
22 terpenoid production.  
23 Terpenoid metabolism is influenced by the microclimate [89] and is involved  
24 in plant defense responses to pathogens and insects [29, 90]. Light exposure  
25 to Sauvignon Blanc grapes (a white grape cultivar) was manipulated by

1 removing adjacent leaves without any detectable differences in berry  
2 temperatures [89]. Increased light exposure increased specific carotenoid  
3 and terpene concentrations in the berry. The responses of carotenoid and  
4 terpenoid production to temperature are less clear. Some effect of  
5 temperature was associated with carotenoid and terpenoid production, but to  
6 a lesser extent than light [89]. Higher concentrations of rotundone, a  
7 sesquiterpene, have been associated with cooler temperatures [91]. Water  
8 deficit can also alter carotenoid and terpenoid metabolism in grapes [11, 92].  
9 Terpenes can act as signals for insect attacks and attract insect predators  
10 [90]. Thus, terpenoid metabolism is highly sensitive to the environment and  
11 influenced by many factors.

12 In contrast to these studies, excess light and heat can affect transcript  
13 abundance and damage berry quality. In addition to a higher rate of malate  
14 catabolism, anthocyanin concentrations and some of the transcript  
15 abundances associated with them are decreased as well [93, 94].

16

#### 17 *Temperature effects on berry maturity and total soluble solids*

18 BOD berries reached maturity at a lower °Brix level than RNO berries; the  
19 cause is likely to be the warmer days and cooler nights in RNO. Higher day  
20 temperature may increase photosynthesis and sugar transport and cooler  
21 night temperatures may reduce fruit respiration. °Brix or TSS approximates  
22 the % sugar in a berry and is a reliable marker of berry maturity in any given  
23 location [95]; however, TSS is an unreliable marker of berry maturity when  
24 comparing grapes from very different climates. The differences in TSS  
25 between BOD and RNO are consistent with other studies on the temperature

1 effects on berry development. Indirect studies have associated gradual  
2 warming over the last century to accelerated phenology and increased sugar  
3 concentrations in the grape berries [96-99]. Increasing temperature can  
4 accelerate metabolism, including sugar biosynthesis and transport, but the  
5 increase in metabolism is not uniform. For example, the increase in  
6 anthocyanin concentration during the ripening phase is not affected as much  
7 as the increase in sugar concentration [100]. These responses vary with the  
8 cultivar [97], complicating this kind of analysis even further.

9 Direct studies of temperature effects on Cabernet Sauvignon berry  
10 composition also are consistent with our data. In one study, the composition  
11 of Cabernet Sauvignon berries was altered substantially for vines grown in  
12 phytotrons at 20 or 30°C temperatures (temperatures that are very similar to  
13 the BOD and RNO temperatures occurring in the present study) [101].  
14 Cooler temperatures promoted anthocyanin development and malate  
15 concentrations (inhibited malate catabolism) and higher temperatures  
16 promoted TSS (°Brix) and proline concentrations [101]. In a second study,  
17 vines were grown at 20 or 30°C day temperatures with night temperatures  
18 5°C cooler than the day [102]. In this study, higher temperatures increased  
19 berry volume and veraison started earlier by about 3 to 4 weeks [102]. The  
20 authors concluded that warmer temperatures hastened berry development.

21 In a third study, Cabernet Sauvignon berry composition was affected in a  
22 similar manner by soil temperatures that differed by 13°C [103].  
23 TSS concentrations are also affected by light and the vine water status. Light  
24 is generally not a factor because there is usually a large enough leaf area  
25 and sufficient light levels to saturate this source to sink relationship [104,

1 105]. Sun-exposed Cabernet Sauvignon berries in the vineyard had higher  
2 TSS than shaded berries [104]. This sunlight effect was attributed largely to  
3 an increase in berry temperature rather than an increase in the fluence rate  
4 per se. A higher grapevine water status results in larger berry size and lower  
5 sugar concentrations [106] and water deficit is known to increase sugar  
6 concentrations in Cabernet Sauvignon [11]. However, temperature is thought  
7 to have the largest effect on sugar concentrations [16].

8 Other transcriptomic data in the present study indicated that BOD berries  
9 were more mature at a lower sugar level than RNO berries. These included  
10 the transcript abundance profiles of genes involved in autophagy, auxin and  
11 ABA signaling, iron homeostasis and seed development. Many of these  
12 DEGs had an accelerated rate of change in BOD berries. While these  
13 transcripts are in the skins, they may be influenced by signals coming from  
14 the seed. In addition, there was a higher transcript abundance for most  
15 genes involved with the circadian clock in BOD berries. PHYB can regulate  
16 the circadian clock [55] and PHYB activity is very sensitive to night  
17 temperatures (BOD had higher night temperatures); PHYB reversion is  
18 accelerated to the inactive form at warmer temperatures [33]. The inactivity  
19 of phytochrome promotes the expression of RVE1, which promotes auxin  
20 concentrations and seed dormancy [58]. Thus, all things considered, it is  
21 likely that temperature and/or the temperature differentials between day and  
22 night significantly contributed to the differences in the rate of berry  
23 development and sugar accumulation in the two locations.

24

25 *Are there reliable markers to harvest berries at maturity?*

1 Determining maturity of grapes is a difficult and error prone process. Reliable  
2 markers could aid in the decision of when to harvest the grapes. “Optimum”  
3 maturity is a judgement call and will ultimately depend on the winemaker’s or  
4 grower’s specific goals or preferences. A combination of empirical factors  
5 can be utilized including °Brix, total acidity, berry tasting in the mouth for  
6 aroma and tannins, seed color, etc. °Brix or total soluble solids by itself may  
7 not be the best marker for berry ripening as it appears to be uncoupled from  
8 berry maturity by temperature. Phenylpropanoid metabolism, including  
9 anthocyanin metabolism, is also highly sensitive to both abiotic and biotic  
10 stresses and may not be a good indicator of full maturity. Thus, color may  
11 not be a good indicator either. Specific developmental signals from the seed  
12 or embryo, such as those involved with auxin and ABA signaling, may  
13 provide more reliable markers for berry ripening in diverse environments, but  
14 will not be useful in seedless grapes. Aromatic compounds may also be  
15 reliable markers but they will need to be generic, developmental markers that  
16 are not influenced by the environment. This study revealed many genes that  
17 are not reliable markers because they were expressed differently in different  
18 environments. One candidate marker that is noteworthy is ATG18G  
19 (g071260). Its transcript abundance increased and was relatively linear with  
20 increasing °Brix and these trends were offset at the two locations relative to  
21 their level of putative fruit maturity (Fig. 4). ATG18G is required for the  
22 autophagy process [107] and maybe important during the fruit ripening  
23 phase. It was found to be a hub gene in a gene subnetwork associated with  
24 fruit ripening and chloroplast degradation [4]. Further testing will be required



1 to know if it is essential for fruit ripening and whether its transcript  
2 abundance is influenced by abiotic and biotic stresses in grape berry skins.

3

#### 4 *Conclusions*

5 The ultimate function of a fruit is to produce fully mature seeds in order to  
6 reproduce another generation of plants. Berry ripening involves complex  
7 signaling that tells other organisms when the fruit is ready for consumption  
8 and seed dispersal. In this study, we tested and confirmed the hypothesis  
9 that the transcript abundance in grape skins differed in two different locations  
10 with different environments. Another goal was to distinguish transcripts with  
11 common profiles from differentially expressed genes. The observations  
12 made in this study provide lists of such genes and generated a large number  
13 of hypotheses to be tested in the future. WGCNA was particularly powerful  
14 and enhanced our analyses. It is clear that berry ripening may respond to a  
15 multitude of factors both before and during the late stages of berry ripening.  
16 The transcriptomic analysis in the late stages of berry ripening in this study  
17 indicated that transcript abundance was very dynamic and possibly  
18 influenced by a number of environmental and internal (e.g. seed signals)  
19 factors. We could discern these influences using functional analysis of the  
20 genes and GO enrichment analysis of the transcriptomic datasets.  
21 Temperature, light, moisture and the local microbiome were major factors  
22 that may have contributed to the transcript abundance profiles of the berry  
23 skins. While earlier fruit development stages clearly have an effect on fruit  
24 composition, the dynamic changes in transcript abundance in the late stages  
25 of berry ripening indicated that berries still have a “sense of place”; it

1 appears that the environment continues to affect berry metabolite  
2 composition, which may impact berry flavor, color and other quality-related  
3 traits. Future studies are required to follow up on these observations. It  
4 appears that fruit ripening is very malleable. Manipulation of the canopy (time  
5 and intensity of leaf removal at different locations on the plant) may offer a  
6 powerful lever to adjust gene expression and berry composition, since these  
7 parameters are strongly affected by light and temperature.

8

## 9 **Methods**

### 10 *Plant materials*

11 Grapevines in Reno (*Vitis vinifera* L. cv. Cabernet Sauvignon clone 8) were  
12 grown on their own roots at the Valley Road Experimental Vineyard at the  
13 Nevada Agricultural Experiment Station on the campus of the University of  
14 Nevada, Reno. Research approval was obtained by Grant R. Cramer from  
15 the Nevada Agricultural Experiment Station and the University of Nevada,  
16 Reno. The grapevines were originally obtained as certified material from  
17 Inland Desert Nursery, Benton, City, Washington, USA. The grapes were  
18 harvested between September 10 and October 2012 depending on maturity.  
19 Maturity was assessed using a digital refractometer (HI 96811, Hanna  
20 Instruments, Woonsocket, RI, USA) to measure soluble solids (°Brix) that are  
21 mostly made up of sugars. Berry clusters were collected between 11.00 h  
22 and 13.00 h (near solar noon) in an attempt to minimize temporal  
23 transcriptional response variations caused by the circadian clock. At harvest,  
24 individual berry °Brix levels were determined with a digital refractometer.  
25 Separated berry skins were placed into 50 mL centrifuge tubes in liquid

1 nitrogen according to sugar level ( $1 \pm 0.5$  °Brix increments; 19 to 27 °Brix). In  
2 this way berries were collected over many days from multiple clusters from  
3 multiple vines from 3 different individually drip-irrigated blocks in the  
4 vineyard. Stem-water potentials were measured weekly to determine  
5 irrigation levels that would maintain the water status of the vines. The vines  
6 were regularly sprayed for fungal prevention. Each block in the vineyard was  
7 considered an experimental replicate. Soil testing was performed by A & L  
8 Western Agricultural Laboratories (Modesto, CA, USA).  
9 Cabernet Sauvignon clone CA33 412 grapevines in Bordeaux were grown  
10 on SO4 rootstock at the VitAdapt parcel on the Institut National de  
11 Recherche Agronomique (INRA) research station in Villenave d'Ornon, in the  
12 Aquitaine region of France. There were 5 replicate blocks within this site to  
13 mitigate soil variation. Additional details of the VitAdapt project can be found  
14 in [108]. Berries for the three replicates were collected at the 14:00 h of the  
15 day. Environmental conditions and variables of the Reno and BOD vineyards  
16 are listed in Table 1. The vines were regularly sprayed for fungal prevention.  
17 Soil testing was performed by Aurea Agrosience (Blanquefort, France).

18

### 19 *RNA extraction*

20 Three experimental replicates from each cultivar at 20, 22, 24 and 26 °Brix  
21 were used for sequencing. In RNO, total RNA was extracted from  
22 approximately 250 mg of frozen, finely ground, skin tissue using a modified  
23 CTAB extraction protocol followed by an additional on-column DNase  
24 digestion using a Qiagen RNeasy Mini Kit (Qiagen, Valencia, CA, USA) as in  
25 [109]. RNA quality and quantity were assessed with a Nanodrop ND-1000

1 spectrophotometer (ThermoFisher Scientific, Waltham, MA, USA) and an  
2 Agilent 2100 Bioanalyzer (Agilent Technologies, Santa Clara, CA, USA).  
3 In BOD, total RNA was extracted according to Reid et al. [110] from 1 g of  
4 frozen, finely ground berry skins. Traces of genomic DNA were removed by  
5 a DNase I treatment according to the manufacturer's instructions (Ambion  
6 TURBO DNA-free DNase, Life Technologies). The RNA was quantified using  
7 a Nanodrop 2000c spectrophotometer (Thermo Scientific) and their integrity  
8 was checked on an 1.8% agarose gel.

9

#### 10 *RNA-Seq library preparation and sequencing*

11 Cabernet Sauvignon 50 bp single-end, barcoded libraries were constructed  
12 and sequenced by the Neuroscience Genomics Core at the University of  
13 California, Los Angeles for the RNO samples and by the Genome Center at  
14 the University of California, Davis for BOD samples using Illumina TruSeq  
15 RNA library prep kits (Illumina Inc., San Diego, CA, USA) according to the  
16 manufacturer's instructions. The barcoded libraries were pooled, multiplexed,  
17 and were sequenced using Illumina TruSeq chemistry (version 3.0) on a  
18 HiSeq2000 sequencer (Illumina Inc., San Diego, CA, USA).

19

#### 20 *Transcript abundance and statistical analysis*

21 The single-end sequence fragments (reads) generated by Illumina  
22 sequencing were base-called and demultiplexed. The fastq files generated  
23 were inspected for sequence quality and contamination using FastQC [111].  
24 Illumina adapters were removed from sequences with Trimomatic [112]  
25 version 0.36. The transcript abundance was estimated from the trimmed

1 fastq files using Salmon [24] version 0.14.1 using --gcBias, --seqBias, --  
2 fldMean=50, --fldSD=1, --validateMappings --rangeFactorizationBins 4. An  
3 augmented hybrid fasta file was built from the *Vitis vinifera* cv. Cabernet  
4 Sauvignon genome [26] using generateDecoyTranscriptome.sh from  
5 salmontools. This file was used to build the index file used for the  
6 quantification with a k-mer size of 15. The salmon output (quant files) was  
7 imported into DESeq2 [27] version 1.22.2 using tximport version 1.10.1 [113]  
8 for determination of differentially expressed genes (DEGs).

### 9 *Coexpression network analysis*

10 A coexpression gene network analysis was performed using WGCNA  
11 version 1.68 [114, 115] using all the libraries for each location. Prior to this  
12 analysis, low-expressed genes were removed with a minimum threshold of  
13 10 counts in all the libraries. Counts data were transformed using the  
14 function varianceStabilizingTransformation of the package DESeq2. The  
15 resulting set of counts was used for network construction and module  
16 detection using the function blockwiseModules. An adjacency matrix was  
17 created by calculating the biweight mid-correlation raised to a power  $\beta$  of 8  
18 and the maxPoutliers parameter set to 0.05. The subsequent Topological  
19 Overlap Matrix (TOM) was used for module detection using the  
20 DynamicTreecut algorithm with a minimal module size of 30 and a branch  
21 merge cut height of 0.25. The module eigengenes were used to evaluate the  
22 association between the resulting modules (22) and the experimental traits  
23 (Brix degrees and locations).

24

1 *Gene functional annotation additions*

2 Gene models of the Cabernet Sauvignon annotation were searched against  
3 different protein databases with the blastx function of the DIAMOND version  
4 0.9.19 software [116] using default parameters and reporting alignments in  
5 the 1% range of the top alignment score. For each gene model, the best  
6 blast hit was kept (1-to-1) and reported in addition of the current annotation.  
7 For multiple hits with the same score (1-to-many), the first hit was kept as the  
8 representative result but the other hits are still accessible. The databases  
9 used were Araport11 ,release 06.17.16, [117] and the *Vitis vinifera* IGGP  
10 12X from EnsemblPlants 38, a part of EnsemblGenomes [118]. The  
11 corresponding gene annotations were obtained from the Araport11 gff file  
12 (release 06.22.16), TAIR10 functional descriptions (release 01.16.13) and a  
13 manually curated and actualized grapevine V1 annotation of PN40024.

14

15 *Functional enrichment of GO categories*

16 Gene Ontology (GO) enrichment was performed using topGO version  
17 2.34.0 [119]. Enriched functional categories with an FDR adjusted p-value >  
18 0.01 after the Fisher's test were filtered for further analysis. For gene  
19 ontology (GO) categories assignments, the GO already present in the  
20 Cabernet Sauvignon annotation file [25] were combined with the previously  
21 manually curated GO annotations of the PN40024 V1 gene models. The GO  
22 from P40024 were attributed to the Cabernet Sauvignon gene model if the  
23 blast hit was presenting a percentage of identity greater than 95 % as well as  
24 an alignment representing more than 95% of the length of both the query  
25 and the subject.

- 1 **Abbreviations**
- 2 **ABA:** ABscisic Acid **ABCG:** Adenosine triphosphate Binding Casette G
- 3 **ABF:** Abscisic acid responsive elements Binding Factor **ABS:** Abnormal
- 4 Shoot **ACO1:** ACc Oxidase 1 **ACOL:** ACc Oxidase-Like **APG9:**
- 5 AutoPhaGy 9 **ARAC1:** Arabidopsis RAC-like 1 **ARF:** Auxin Response
- 6 Factor **ATG:** AuTophagy **ATH:** Arabidopsis Thaliana abc2 Homolog
- 7 **BAM:** Barley Any Meristem **BCAT:** Branched-Chain-amino-acid
- 8 AminoTransferase **BOD:** BOrDeaux **bp:** base pair **BSMT1:**
- 9 Benzoate/Salicylate MethylTransferase 1 **CBF1:** C-repeat/DRE Binding
- 10 Factor 1 **CCA1:** Circadian Clock Associated 1 **CLE:** CLavata3/Esr-related
- 11 **COP1:** COnstitutive Photomorphogenic 1 **CML:** CalModulin-Like **CRY3:**
- 12 CRYptochrome 3 **cv:** cultivar **CYSB:** cystatin B **DEG(s):** Differentially
- 13 Expressed Gene(s) **DHS:** 3-deoxy-D-arabino-Heptulosonate 7-phosphate
- 14 Synthase **DMAPP:** DiMethylAllyl diPhosPhate **DUF642:** Domain of
- 15 Unknown Function 642 **DXR:** 1-deoxy-D-Xylulose 5-phosphate
- 16 Reductoisomerase **EC:** Evening Complex **EE:** Evening Element **EIN:**
- 17 Ethylene INsensitive **ELF:** EarLy Flowering **ERF:** Ethylene Response
- 18 Factor **EXL2:** EXordium Like 2 **FAR1:** Far-Red impaired Response 1
- 19 **FDR:** False Discovery Rate **FER:** FERritin **FOP1:** FOlded Petal 1 **FRS:**
- 20 FAR1-Related Sequence **GH3:** GH3 family protein **GIDB1:** Gibberellic
- 21 acid Insensitive Dwarf1B **GO:** Gene Ontology **HAD:** HaloAcid
- 22 Dehalogenase-like hydrolase protein **HB12:** HomeoBox 12 **HDS:** 4-
- 23 Hydroxy-3-methylbut-2-en-1-yl Diphosphate Synthase **IAA:** Indole Acetic
- 24 Acid **IDD14:** InDeterminate-Domain 14 **IPP:** IsoPentenyl Pyrophosphate
- 25 **IREG:** Iron REGulated **JAR:** JASmonate Resistant **MAT3:** Methionine

1 AdenosylTransferase 3 **LHY**: Late elongated Hypocotyl **MEP**:  
2 MethylErythritol 4-Phosphate **MLA**: intracellular MiLdew A **NAC073**: NAC  
3 domain containing protein 73 **NCBI**: National Center for Biotechnology  
4 Information **NCED**: Nine-Cis Epoxy-carotenoid Dioxygenase **NRAMP3**:  
5 Natural Resistance-Associated Macrophage Protein 3 **PAL**:  
6 PhenylAlanine Lyase **PCL1**: PhytoCLOCK 1 **PHY**: PHYtochrome **PIF**:  
7 Phytochrome Interacting Factor **PR**: Pathogenesis Related **PRR**:  
8 Psuedo-Response Regulator **PSY**: Phytoene SYNthase **RNO**: ReNO  
9 **ROS**: Reactive Oxygen Species **RVE1**: ReVeille 1 **SA**: Salicylic Acid  
10 **SIA**: Salt Induced Abc kinase **SnRK**: SNF1 Related protein Kinase **STS**:  
11 STilbene Synthase **SULTR**: SULfate TRAnsporter **TAIR**: The Arabidopsis  
12 Information Resource **TAT**: TyrosineAmino Transferase **TOC**: Timing Of  
13 Cab expression **TPPD**: Trehalose Phosphate Phosphatase D **TPL**:  
14 ToPLess **TPM**: Transcripts Per Million **TPS**: TerPene Synthase **TSS**:  
15 Total Soluble Solids **VIT**: Vacuolar Iron Transporter **WGCNA**: Weighted  
16 Gene Co-expression Network Analysis **XTH**: Xyloglucan  
17 endoTransglucosylase/Hydrolase **YSL**: Yellow Stripe-Like

18 **Declarations**

19 **Ethics**

20 Not applicable.

21

22 **Consent to publish**

23 Not applicable.

24

25 **Competing interests**



1 The authors declare that they have no competing interests. The first  
2 author is a section editor of BMC Plant Biology.

3

#### 4 **Authors' contributions**

5 GRC, SG, and AD-I designed the experiments. RG and AH collected  
6 berries, analyzed the °Brix levels and extracted the RNA. The original  
7 data were analyzed with the PN40024 genome annotation by GRC, but  
8 NC updated the analysis with the new Cabernet Sauvignon genome  
9 annotation, performed the WGCNA and assisted with estimation of the  
10 TPMs. GRC processed and analyzed the data and wrote the body of the  
11 paper. All authors reviewed, edited and approved the final version of the  
12 manuscript.

13

#### 14 **Availability of supporting data**

15 RNA-Seq data were deposited with the Sequence Read Archive (SRA)  
16 database at the National Center for Biotechnology Information (NCBI)  
17 with the SRA accession number PRJNA260535 [120] for the RNO data  
18 and SRP149949 for the BOD data.

19

#### 20 **Acknowledgements**

21 We would like to thank Aude Habran for her assistance in collecting berry  
22 skins and RNA extraction of BOD berries and thank the many UNR  
23 Biochemistry senior thesis undergraduate students that assisted in berry  
24 separation in the RNO berries.

## **Funding**

This research was supported by the University of Nevada, Reno, Agriculture Experimental Station with the Multi-state USDA-Hatch Grant NEV00383A to GRC.

## Tables

**Table 1.** Environmental variables for the harvest times in BOD and RNO. Grapes were harvested in RNO from September 10 to 26, 2012 and in BOD from September 17 to October 8, 2013.

| Environmental Variable                                 | BOD (2013)     | RNO (2012)   |
|--------------------------------------------------------|----------------|--------------|
| Elevation (m)                                          | 25             | 1,373        |
| Average Daily Solar Radiation (kW-hr m <sup>-2</sup> ) | 1.17           | 5.86         |
| Day length Starting Harvest Date                       | 12:25:36       | 12:38:34     |
| Day length Ending Harvest Date                         | 11:20:57       | 11:57:37     |
| Maximum Temperature Starting Harvest Date              | 19             | 30.5         |
| Minimum Temperature Starting Harvest Date              | 13             | 13.9         |
| Maximum Temperature Ending Harvest Date                | 18             | 27.8         |
| Minimum Temperature Ending Harvest Date (°C)           | 11             | 6.7          |
| Ave September Maximum Temperature (°C)                 | 23.9           | 30.2         |
| Ave September Minimum Temperature (°C)                 | 13.9           | 10.2         |
| Latitude                                               | 44°47'23.83" N | 39°52'96" N  |
| Longitude                                              | 0°34'39.3" W   | 119°81'38" W |
| September Precipitation (mm)                           | 65.5           | 2.03         |
| Average Monthly Relative Humidity (%)                  | 74             | 34           |
| Soil Type                                              | Gravelly soil  | Sandy Loam   |
| Soil pH                                                | 6.2            | 6.7          |
| Soil Fe (µg g <sup>-1</sup> )                          | 193            | 38           |
| Root stock                                             | SO4            | Own-rooted   |

## **Supplemental Information**

**Additional file 1.** Log<sub>2</sub> transcripts per million (TPM) to genes uniquely mapped to the V1 Cabernet Sauvignon genome.

**Additional file 2.** Differentially expresses genes (DEGs) determined by DESeq2 for berry skin samples at 22°Brix from BOD and RNO.

**Additional file 3.** Statistical results from gene set enrichment analysis of the DEGs using topGO.

**Additional file 4.** Image of the top 25 connected GO categories in the topGO network of the DEGs in Additional file 3.

**Additional file 5.** Common genes between BOD and RNO from transcriptomic approaches 2 and 3.

**Additional file 6.** Module membership (MM) of all filtered transcripts as defined by WGCNA. Values are the kME (module eigengene connectivity).

**Additional file 7.** Heatmap correlation of berry traits (°Brix level, BOD, RNO) of each of 19 gene modules. Gene modules were identified by a color name (MMcolornumber) as assigned by the WGCNA R package. Values in each heatmap block are the correlation (left value) and p-value (in parentheses) of the module with the berry trait.

**Additional file 8.** topGO analysis of all modules with genes having a kME >0.80. The results for each module are on a separate tab within the file.

**Additional file 9.** topGO analysis of the top 400 genes with the greatest differential expression between high and low °Brix samples in BOD berry skins.

**Additional file 10.** topGO analysis of the top 400 genes with the greatest differential expression between high and low °Brix samples in RNO berry skins.

**Additional file 11.** Representative examples of transcript profiles of some stilbene synthase (STS) genes that were differentially expressed.

**Additional file 12.** Transcript abundance of circadian clock genes from BOD and RNO berry skins. The data are placed on a circadian clock model derived from [4]. Lines in the model represent known interactions between genes; red arrows are positive interactions, black lines are negative interactions, and blue lines indicate direct physical interactions but the direction, positive or negative, is unknown. No lines indicate that there are no known interactions at this time. Transcript profiles outlined in red highlight significantly higher transcript abundance for the BOD berries.

**Additional file 13.** A model of the peripheral genes including light sensing genes that interact with core circadian clock genes in BOD and RNO berry skins. Lines represent gene interactions as described in Additional file 12. Red and blue lightning bolts represent the reception of their respective light wavelengths for each gene symbol. Transcript profiles outlined in red highlight significantly higher transcript abundance for the BOD berries.

**Additional file 14.** Transcript profiles of ABA biosynthesis and signaling genes that are differentially expressed between BOD and RNO berry skins.

### Figure legends

**Figure 1.** Principal component analysis of the transcriptomic data from berry skin samples at different °Brix levels from BOD and RNO.

**Figure 2.** Plots of the top genes from berry skins from Bordeaux and Reno with the highest increase in transcript abundance (TPM) between the lowest and highest sugar levels (°Brix). Values are the means  $\pm$  SE (n = 3). Error bars not shown are smaller than the symbol. The symbol legend is displayed in the figure. EXL2 is EXordium Like 2 ; HB12 is HOMEBOX 12; BSMT1 is a benzoate/salicylate methyltransferase 1; HAD is haloacid dehalogenase-like hydrolase protein; STS24 is stilbene synthase 24, NAC073 is a NAC domain containing protein; TPS 35 is terpene synthase 35, and MAT3 is methionine adenosyltransferase 3.

**Figure 3.** Plots of the top genes from berry skins from Bordeaux and Reno with the highest decrease in transcript abundance (TPM) between the lowest and highest sugar levels (°Brix). Values are the means  $\pm$  SE (n = 3). Error bars not shown are smaller than the symbol. The symbol legend is displayed in the figure. GDSL is a sequence motif; LRR is a leucine rich repeat protein; DUF642 is a domain of unknown function protein; TIP1;1 is a tonoplast intrinsic protein 1;1.

**Figure 4.** The transcript abundance of some autophagy-related (ATG) genes. Data shown are the means  $\pm$  SE; n = 3. Error bars not shown are smaller than the symbol. The symbol legend is displayed in the figure. APG9 is Autophagy 9.

**Figure 5.** Expression profiles of some terpene synthase (TPS) genes. Data shown are the means  $\pm$  SE; n = 3. Error bars not shown are smaller than the symbol. The symbol legend is displayed in the figure.

**Figure 6.** The transcript abundance of some DEGs that are involved in the amino acid metabolism. Data shown are the means  $\pm$  SE; n = 3. Error bars not shown are smaller than the symbol. The symbol legend is displayed in the figure. PAL1 is a phenylalanine ammonia lyase; DHS1 is a 3-deoxy-D-arabino-heptulosonate 7-phosphate synthase; BCAT5 is a branched-chain-amino-acid aminotransferase; and TAT7 is a tyrosine aminotransferase.

**Figure 7.** A simplified model of the core circadian clock genes. Black lines and bars represent known inhibitory reactions, red arrows indicate known stimulatory reactions, and blue lines represent known physical interactions. PHYB is phytochrome B; PIF7 is Phytochrome Interacting Factor 7; COP1 is Constitutive Photomorphogenic 1; FAR1 is Far-Red Impaired Response 1; FHY3 is Far Red Elongated Hypocotyl 3; ELF4 is Early Flowering 4; ELF3 is Early Flowering 3; CCA1 is Circadian Clock Associated 1; PRR9 is Psuedo-Response Related 9; PRR7 is Psuedo-Response Related 7; PRR5 is Psuedo-Response Related 5; TOC1 is Timing of CAB expression 1; and RVE1 is Reveille 1.

**Figure 8.** Transcript profiles of some cold responsive genes. Data shown are the means  $\pm$  SE; n = 3. Error bars not shown are smaller than the symbol. The symbol legend is displayed in the figure. CBF1 is C-Repeat Binding Factor 1; IDD14 is Indeterminate-Domain 14; CML41 is Calmodulin 41; CYSB is Cystatin B; XTH23 is Xyloglucan Endotransglucosylase/Hydrolase 23 and SUFTR3;4 is Sulfate Transporter 3;4.

**Figure 9.** Expression profiles of pathogenesis proteins (PR) involved with powdery mildew. Data shown are the means  $\pm$  SE; n = 3. Error bars not shown are smaller than the symbol. The symbol legend is displayed in the figure. MLA10 is Intracellular Mildew A 10.

**Figure 10.** The transcript abundance of DEGs involved with ethylene metabolism and signaling. Data shown are the means  $\pm$  SE; n = 3. Error bars not shown are smaller than the symbol. The symbol legend is displayed in the figure. ACS6 is 1-Aminocyclopropane-1-Carboxylic Acid (ACC) Synthase 6; ACO1 is ACc Oxidase 1; ACOL is ACc Oxidase-Like; ERS1 is Ethylene Response Sensor 1; CTR1 is Constitutive Triple Response 1, EIN3 is Ethylene-Insensitive 3; and ERF1 and ERF2 are Ethylene Response Factors 1 and 2.

**Figure 11.** Expression profiles of DEGs involved in iron homeostasis. Data shown are the means  $\pm$  SE; n = 3. Error bars not shown are smaller than the symbol. The symbol legend is displayed in the figure. SIA1 is Salt-Induced ABC1 Kinase 1; VIT1 is Vacuolar Iron Transporter 1; FER1 and 2 are Ferritin 1 and 2; YSL3 is Yellow Stripe-like 3; IREG3 is Iron-Regulated Protein 3; NRAMP3 is Natural Resistance-Associated



Macrophage Protein 3; ATH13 is ABC2 homolog 13; and ABCI8 is ATP-Binding Cassette I8.

## References

1. This P, Lacombe T, Thomas MR: **Historical origins and genetic diversity of wine grapes**. *Trends Genet* 2006, **22**(9):511-519. doi:10.1016/j.tig.2006.07.008
2. Kuhn N, Guan L, Dai ZW, Wu BH, Lauvergeat V, Gomes E, Li SH, Godoy F, Arce-Johnson P, Delrot S: **Berry ripening: recently heard through the grapevine**. *J Exp Bot* 2014, **65**(16):4543-4559. doi:10.1093/jxb/ert395
3. Fortes AM, Teixeira RT, Agudelo-Romero P: **Complex Interplay of Hormonal Signals during Grape Berry Ripening**. *Molecules* 2015, **20**(5):9326-9343. doi:10.3390/molecules20059326
4. Ghan R, Petereit J, Tillett RL, Schlauch KA, Toubiana D, Fait A, Cramer GR: **The common transcriptional subnetworks of the grape berry skin in the late stages of ripening**. *BMC Plant Biol* 2017, **17**(1):94. doi:10.1186/s12870-017-1043-1
5. Gonzalez-Barreiro C, Rial-Otero R, Cancho-Grande B, Simal-Gandara J: **Wine aroma compounds in grapes: a critical review**. *Crit Rev Food Sci Nutr* 2015, **55**(2):202-218. doi:10.1080/10408398.2011.650336
6. Boss PK, Kalua CM, Nicholson EL, Maffei SM, Böttcher C, Davies C: **Fermentation of grapes throughout development identifies stages critical to the development of wine volatile composition**. *Aust J Grape Wine Res* 2018, **24**(1):24-37. doi:10.1111/ajgw.12296
7. Boss PK, Pearce AD, Zhao Y, Nicholson EL, Dennis EG, Jeffery DW: **Potential grape-derived contributions to volatile ester concentrations in wine**. *Molecules* 2015, **20**(5):7845-7873. doi:10.3390/molecules20057845
8. Dennis EG, Keyzers RA, Kalua CM, Maffei SM, Nicholson EL, Boss PK: **Grape contribution to wine aroma. Production of hexyl acetate, octyl acetate and benzyl acetate during yeast fermentation is dependent upon precursors in the must**. *J Agric Food Chem* 2012, **60**:2638-2641. doi:10.1021/jf2042517
9. Sun P, Schuurink RC, Caissard JC, Hugueney P, Baudino S: **My Way: Noncanonical Biosynthesis Pathways for Plant Volatiles**. *Trends Plant Sci* 2016, **21**(10):884-894. doi:10.1016/j.tplants.2016.07.007
10. Schwab W, Wust M: **Understanding the Constitutive and Induced Biosynthesis of Mono- and Sesquiterpenes in Grapes (*Vitis vinifera*): A Key to Unlocking the Biochemical Secrets of**

**Unique Grape Aroma Profiles.** *J Agric Food Chem* 2015, **63**(49):10591-10603. doi:10.1021/acs.jafc.5b04398

11. Deluc LG, Quilici DR, Decendit A, Grimplet J, Wheatley MD, Schlauch KA, Merillon JM, Cushman JC, Cramer GR: **Water deficit alters differentially metabolic pathways affecting important flavor and quality traits in grape berries of Cabernet Sauvignon and Chardonnay.** *BMC Genomics* 2009, **10**:212. doi:10.1186/1471-2164-10-212
12. Cramer GR, Evans J, Ardelean R, Keady M, Quilici D, Schooley DA: **Impacts of regulated-deficit irrigation on the flavor components of grapes and wines.** In: *Macromolecules and Secondary Metabolites of Grapevine and Wine*. Edited by Jeandet P, Clément C, Conreux A. Paris: Lavoisier; 2007: 53-59.
13. Koundouras S, Marinos V, Gkoulioti A, Kotseridis Y, van Leeuwen C: **Influence of vineyard location and vine water status on fruit maturation of nonirrigated cv. Agiorgitiko (*Vitis vinifera* L.). Effects on wine phenolic and aroma components.** *J Agric Food Chem* 2006, **54**:5077-5086.
14. Drappier J, Thibon C, Rabot A, Geny-Denis L: **Relationship between wine composition and temperature: Impact on Bordeaux wine typicity in the context of global warming—Review.** *CRC Crit Rev Food Sci Nutr* 2017:1-17. doi:10.1080/10408398.2017.1355776
15. van Leeuwen C, Friant P, Choné X, Tregoat O, Koundouras S, Dubourdieu D: **Influence of Climate, Soil, and Cultivar on Terroir.** *Amer J Enol Vitic* 2004, **55**(3):207.
16. Martínez-Lüscher J, Kizildeniz T, Vučetić V, Dai Z, Luedeling E, van Leeuwen C, Gomès E, Pascual I, Irigoyen JJ, Morales F, Delrot S: **Sensitivity of Grapevine Phenology to Water Availability, Temperature and CO<sub>2</sub> Concentration.** *Front Environ Sci* 2016, **4**:48.
17. Bokulich NA, Collins TS, Masarweh C, Allen G, Heymann H, Ebeler SE, Mills DA: **Associations among Wine Grape Microbiome, Metabolome, and Fermentation Behavior Suggest Microbial Contribution to Regional Wine Characteristics.** *mBio* 2016, **7**(3). doi:10.1128/mBio.00631-16
18. Berdeja M, Nicolas P, Kappel C, Dai ZW, Hilbert G, Peccoux A, Lafontaine M, Ollat N, Gomès E, Delrot S: **Water limitation and rootstock genotype interact to alter grape berry metabolism through transcriptome reprogramming.** *Hort Res* 2015, **2**:15012. doi:10.1038/hortres.2015.12

19. Marè C, Aprile A, Roncaglia E, Tocci E, Corino LG, De Bellis L, Cattivelli L: **Rootstock and soil induce transcriptome modulation of phenylpropanoid pathway in grape leaves.** *J Plant Interact* 2013, **8**(4):334-349. doi:10.1080/17429145.2012.754958
20. Cookson SJ, Ollat N: **Grafting with rootstocks induces extensive transcriptional re-programming in the shoot apical meristem of grapevine.** *BMC Plant Biol* 2013, **13**:147. doi:10.1186/1471-2229-13-147
21. Corso M, Vannozzi A, Ziliotto F, Zouine M, Maza E, Nicolato T, Vitulo N, Meggio F, Valle G, Bouzayen M, Müller M, Munné-Bosch S, Lucchin M, Bonghi C: **Grapevine Rootstocks Differentially Affect the Rate of Ripening and Modulate Auxin-Related Genes in Cabernet Sauvignon Berries.** *Front Plant Sci* 2016, **7**:69.
22. Cochetel N, Escudie F, Cookson SJ, Dai Z, Vivin P, Bert PF, Munoz MS, Delrot S, Klopp C, Ollat N, Lauvergeat V: **Root transcriptomic responses of grafted grapevines to heterogeneous nitrogen availability depend on rootstock genotype.** *J Exp Bot* 2017, **68**(15):4339-4355. doi:10.1093/jxb/erx224
23. Fabres PJ, Collins C, Cavagnaro TR, Rodriguez Lopez CM: **A Concise Review on Multi-Omics Data Integration for Terroir Analysis in Vitis vinifera.** *Front Plant Sci* 2017, **8**:1065. doi:10.3389/fpls.2017.01065
24. Patro R, Duggal G, Love MI, Irizarry RA, Kingsford C: **Salmon provides fast and bias-aware quantification of transcript expression.** *Nat Methods* 2017, **14**(4):417-419. doi:10.1038/nmeth.4197
25. Minio A, Massonnet M, Figueroa-Balderas R, Vondras AM, Blanco-Ulate B, Cantu D: **Iso-Seq Allows Genome-Independent Transcriptome Profiling of Grape Berry Development.** *G3 (Bethesda)* 2019, **9**(3):755-767. doi:10.1534/g3.118.201008
26. Chin CS, Peluso P, Sedlazeck FJ, Nattestad M, Concepcion GT, Clum A, Dunn C, O'Malley R, Figueroa-Balderas R, Morales-Cruz A, Cramer GR, Delledonne M, Luo C, Ecker JR, Cantu D, Rank DR, Schatz MC: **Phased diploid genome assembly with single-molecule real-time sequencing.** *Nat Methods* 2016, **13**(12):1050-1054. doi:10.1038/nmeth.4035
27. Love MI, Huber W, Anders S: **Moderated estimation of fold change and dispersion for RNA-seq data with DESeq2.** *Genome Biol* 2014, **15**(12):1-21. doi:10.1186/s13059-014-0550-8

28. Guo P, Li Z, Huang P, Li B, Fang S, Chu J, Guo H: **A Tripartite Amplification Loop Involving the Transcription Factor WRKY75, Salicylic Acid, and Reactive Oxygen Species Accelerates Leaf Senescence.** *Plant Cell* 2017, **29**(11):2854-2870. doi:10.1105/tpc.17.00438
29. Martin DM, Aubourg S, Schouwey MB, Daviet L, Schalk M, Toub O, Lund ST, Bohlmann J: **Functional annotation, genome organization and phylogeny of the grapevine (*Vitis vinifera*) terpene synthase gene family based on genome assembly, FLcDNA cloning, and enzyme assays.** *BMC Plant Biol* 2010, **10**:226. doi:10.1186/1471-2229-10-226
30. Dudareva N, Martin D, Kish CM, Kolosova N, Gorenstein N, Faldt J, Miller B, Bohlmann J: **(E)-beta-ocimene and myrcene synthase genes of floral scent biosynthesis in snapdragon: function and expression of three terpene synthase genes of a new terpene synthase subfamily.** *Plant Cell* 2003, **15**(5):1227-1241.
31. Young PR, Lashbrooke JG, Alexandersson E, Jacobson D, Moser C, Velasco R, Vivier MA: **The genes and enzymes of the carotenoid metabolic pathway in *Vitis vinifera* L.** *BMC Genomics* 2012, **13**:243. doi:10.1186/1471-2164-13-243
32. Jung J-H, Domijan M, Klose C, Biswas S, Ezer D, Gao M, Khattak AK, Box MS, Charoensawan V, Cortijo S, Kumar M, Grant A, Locke JCW, Schäfer E, Jaeger KE, Wigge PA: **Phytochromes function as thermosensors in *Arabidopsis*.** *Science* 2016, **354**(6314):886.
33. Legris M, Klose C, Burgie ES, Rojas CC, Neme M, Hiltbrunner A, Wigge PA, Schafer E, Vierstra RD, Casal JJ: **Phytochrome B integrates light and temperature signals in *Arabidopsis*.** *Science* 2016, **354**(6314):897-900. doi:10.1126/science.aaf5656
34. Tattersall EA, Grimplet J, Deluc L, Wheatley MD, Vincent D, Osborne C, Ergul A, Lomen E, Blank RR, Schlauch KA, Cushman JC, Cramer GR: **Transcript abundance profiles reveal larger and more complex responses of grapevine to chilling compared to osmotic and salinity stress.** *Funct Integr Genomics* 2007, **7**(4):317-333.
35. Jaglo-Ottoson KR, Gilmour SJ, Zarka DG, Schabenberger O, Thomashow MF: ***Arabidopsis* CBF1 overexpression induces COR genes and enhances freezing tolerance.** *Science* 1998, **280**:104-106.
36. Seo PJ, Kim MJ, Ryu JY, Jeong EY, Park CM: **Two splice variants of the IDD14 transcription factor competitively form**

**nonfunctional heterodimers which may regulate starch metabolism.** *Nat Commun* 2011, **2**:303. doi:10.1038/ncomms1303

37. Zhang X, Liu S, Takano T: **Two cysteine proteinase inhibitors from *Arabidopsis thaliana*, AtCYSa and AtCYSb, increasing the salt, drought, oxidation and cold tolerance.** *Plant Mol Biol* 2008, **68**(1-2):131-143. doi:10.1007/s11103-008-9357-x
38. Fung RW, Gonzalo M, Fekete C, Kovacs LG, He Y, Marsh E, McIntyre LM, Schachtman DP, Qiu W: **Powdery mildew induces defense-oriented reprogramming of the transcriptome in a susceptible but not in a resistant grapevine.** *Plant Physiol* 2008, **146**(1):236-249. doi:10.1104/pp.107.108712
39. Davies C, Boss PK, Robinson SP: **Treatment of grape berries, a nonclimacteric fruit with a synthetic auxin, retards ripening and alters the expression of developmentally regulated genes.** *Plant Physiol* 1997, **115**:1155-1161.
40. Böttcher C, Boss PK, Davies C: **Delaying Riesling grape berry ripening with a synthetic auxin affects malic acid metabolism and sugar accumulation, and alters wine sensory characters.** *Funct Plant Biol* 2012, **39**(9):745. doi:10.1071/fp12132
41. Cramer GR: **Abiotic stress & plant responses from the whole vine to the genes.** *Aust J Grape Wine Res* 2010, **16**:86-93.
42. Tan BC, Joseph LM, Deng WT, Liu L, Li QB, Cline K, McCarty DR: **Molecular characterization of the *Arabidopsis* 9-cis epoxy-carotenoid dioxygenase gene family.** *Plant J* 2003, **35**(1):44-56.
43. Frey A, Effroy D, Lefebvre V, Seo M, Perreau F, Berger A, Sechet J, To A, North HM, Marion-Poll A: **Epoxy-carotenoid cleavage by NCED5 fine-tunes ABA accumulation and affects seed dormancy and drought tolerance with other NCED family members.** *Plant J* 2012, **70**(3):501-512. doi:10.1111/j.1365-3113.2011.04887.x
44. Rattanakon S, Ghan R, Gambetta GA, Deluc LG, Schlauch KA, Cramer GR: **Abscisic acid transcriptomic signaling varies with grapevine organ.** *BMC Plant Biol* 2016, **16**(1):72. doi:10.1186/s12870-016-0763-y
45. Hopper DW, Ghan R, Schlauch KA, Cramer GR: **Transcriptomic network analyses of leaf dehydration responses identify highly connected ABA and ethylene signaling hubs in three grapevine species differing in drought tolerance.** *BMC Plant Biol* 2016, **16**(1):118. doi:10.1186/s12870-016-0804-6

46. Takahashi F, Suzuki T, Osakabe Y, Betsuyaku S, Kondo Y, Dohmae N, Fukuda H, Yamaguchi-Shinozaki K, Shinozaki K: **A small peptide modulates stomatal control via abscisic acid in long-distance signalling.** *Nature* 2018, **556**(7700):235-238. doi:10.1038/s41586-018-0009-2
47. Broekaert WF, Delaure SL, De Bolle MF, Cammue BP: **The role of ethylene in host-pathogen interactions.** *Annu Rev Phytopathol* 2006, **44**:393-416. doi:10.1146/annurev.phyto.44.070505.143440
48. Dubois M, Van den Broeck L, Inze D: **The Pivotal Role of Ethylene in Plant Growth.** *Trends Plant Sci* 2018, **23**(4):311-323. doi:10.1016/j.tplants.2018.01.003
49. Liu M, Pirrello J, Chervin C, Roustan JP, Bouzayen M: **Ethylene Control of Fruit Ripening: Revisiting the Complex Network of Transcriptional Regulation.** *Plant Physiol* 2015, **169**(4):2380-2390. doi:10.1104/pp.15.01361
50. Chang KN, Zhong S, Weirauch MT, Hon G, Pelizzola M, Li H, Huang SS, Schmitz RJ, Urich MA, Kuo D, Nery JR, Qiao H, Yang A, Jamali A, Chen H, Ideker T, Ren B, Bar-Joseph Z, Hughes TR, Ecker JR: **Temporal transcriptional response to ethylene gas drives growth hormone cross-regulation in Arabidopsis.** *Elife* 2013, **2**:e00675. doi:10.7554/eLife.00675
51. Van den Broeck L, Dubois M, Vermeersch M, Storme V, Matsui M, Inze D: **From network to phenotype: the dynamic wiring of an Arabidopsis transcriptional network induced by osmotic stress.** *Mol Syst Biol* 2017, **13**(12):961. doi:10.15252/msb.20177840
52. Jiao Y, Ma L, Strickland E, Deng XW: **Conservation and divergence of light-regulated genome expression patterns during seedling development in rice and Arabidopsis.** *Plant Cell* 2005, **17**(12):3239-3256. doi:10.1105/tpc.105.035840
53. Hu W, Su YS, Lagarias JC: **A light-independent allele of phytochrome B faithfully recapitulates photomorphogenic transcriptional networks.** *Mol Plant* 2009, **2**(1):166-182. doi:10.1093/mp/ssn086
54. Delker C, van Zanten M, Quint M: **Thermosensing Enlightened.** *Trends Plant Sci* 2017, **22**(3):185-187. doi:10.1016/j.tplants.2017.01.007
55. Hsu PY, Harmer SL: **Wheels within wheels: the plant circadian system.** *Trends Plant Sci* 2014, **19**(4):240-249. doi:10.1016/j.tplants.2013.11.007



56. Johansson M, Staiger D: **Time to flower: interplay between photoperiod and the circadian clock.** *J Exp Bot* 2015, **66**(3):719-730. doi:10.1093/jxb/eru441
57. Huang H, Alvarez S, Bindbeutel R, Shen Z, Naldrett MJ, Evans BS, Briggs SP, Hicks LM, Kay SA, Nusinow DA: **Identification of Evening Complex Associated Proteins in Arabidopsis by Affinity Purification and Mass Spectrometry.** *Mol Cell Proteomics* 2016, **15**(1):201-217. doi:10.1074/mcp.M115.054064
58. Jiang Z, Xu G, Jing Y, Tang W, Lin R: **Phytochrome B and REVEILLE1/2-mediated signalling controls seed dormancy and germination in Arabidopsis.** *Nat Commun* 2016, **7**:12377. doi:10.1038/ncomms12377
59. Leivar P, Monte E, Al-Sady B, Carle C, Storer A, Alonso JM, Ecker JR, Quail PH: **The Arabidopsis phytochrome-interacting factor PIF7, together with PIF3 and PIF4, regulates responses to prolonged red light by modulating phyB levels.** *Plant Cell* 2008, **20**(2):337-352. doi:10.1105/tpc.107.052142
60. Kidokoro S, Maruyama K, Nakashima K, Imura Y, Narusaka Y, Shinwari ZK, Osakabe Y, Fujita Y, Mizoi J, Shinozaki K, Yamaguchi-Shinozaki K: **The phytochrome-interacting factor PIF7 negatively regulates DREB1 expression under circadian control in Arabidopsis.** *Plant Physiol* 2009, **151**(4):2046-2057. doi:10.1104/pp.109.147033
61. Rawat R, Schwartz J, Jones MA, Sairanen I, Cheng Y, Andersson CR, Zhao Y, Ljung K, Harmer SL: **REVEILLE1, a Myb-like transcription factor, integrates the circadian clock and auxin pathways.** *PNAS* 2009, **106**(39):16883-16888. doi:10.1073/pnas.0813035106
62. Gupta SK, Sharma S, Santisree P, Kilambi HV, Appenroth K, Sreelakshmi Y, Sharma R: **Complex and shifting interactions of phytochromes regulate fruit development in tomato.** *Plant Cell Environ* 2014, **37**(7):1688-1702. doi:10.1111/pce.12279
63. Kuhn N, Ormeno-Nunez J, Jaque-Zamora G, Perez FJ: **Photoperiod modifies the diurnal expression profile of VvPHYA and VvPHYB transcripts in field-grown grapevine leaves.** *J Plant Physiol* 2009, **166**(11):1172-1180. doi:10.1016/j.jplph.2009.01.005
64. Stockinger EJ, Gilmour SJ, Thomashow MF: **Arabidopsis thaliana CBF1 encodes an AP2 domain-containing transcriptional activator that binds to the C-repeat/DRE, a cis-acting DNA regulatory element that stimulates transcription in response to low temperature and water deficit.** *PNAS* 1997, **94**(February):1035-1040.



65. Tillett RL, Wheatley MD, Tattersall EA, Schlauch KA, Cramer GR, Cushman JC: **The Vitis vinifera C-repeat binding protein 4 (VvCBF4) transcriptional factor enhances freezing tolerance in wine grape.** *Plant Biotechnol J* 2012, **10**(1):105-124. doi:10.1111/j.1467-7652.2011.00648.x
66. Nakashima K, Yamaguchi-Shinozaki K: **ABA signaling in stress-response and seed development.** *Plant Cell Rep* 2013, **32**(7):959-970. doi:10.1007/s00299-013-1418-1
67. Nicolas P, Lecourieux D, Kappel C, Cluzet S, Cramer G, Delrot S, Lecourieux F: **The basic leucine zipper transcription factor ABSCISIC ACID RESPONSE ELEMENT-BINDING FACTOR2 is an important transcriptional regulator of abscisic acid-dependent grape berry ripening processes.** *Plant Physiol* 2014, **164**(1):365-383. doi:10.1104/pp.113.231977
68. Wang R, Estelle M: **Diversity and specificity: auxin perception and signaling through the TIR1/AFB pathway.** *Curr Opin Plant Biol* 2014, **21**:51-58. doi:10.1016/j.pbi.2014.06.006
69. Wang L, Hua D, He J, Duan Y, Chen Z, Hong X, Gong Z: **Auxin Response Factor2 (ARF2) and its regulated homeodomain gene HB33 mediate abscisic acid response in Arabidopsis.** *PLoS Genet* 2011, **7**(7):e1002172. doi:10.1371/journal.pgen.1002172
70. Jeandet P, Douillet-Breuil AC, Bessis R, Debord S, Sbaghi M, Adrian M: **Phytoalexins from the Vitaceae: biosynthesis, phytoalexin gene expression in transgenic plants, antifungal activity, and metabolism.** *J Agric Food Chem* 2002, **50**(10):2731-2741.
71. Dufour MC, Magnin N, Dumas B, Vergnes S, Corio-Costet MF: **High-throughput gene-expression quantification of grapevine defense responses in the field using microfluidic dynamic arrays.** *BMC Genomics* 2016, **17**(1):957. doi:10.1186/s12864-016-3304-z
72. Jacobs AK, Dry IB, Robinson SP: **Induction of different pathogenesis-related cDNAs in grapevine infected with powdery mildew and treated with ethephon.** *Plant Path* 1999, **48**(3):325-336.
73. Belhadj A, Telef N, Cluzet S, Bouscaut J, Corio-Costet MF, Merillon JM: **Ethephon elicits protection against Erysiphe necator in grapevine.** *J Agric Food Chem* 2008, **56**(14):5781-5787. doi:10.1021/jf800578c

74. Dixon RA, Paiva NL: **Stress-Induced Phenylpropanoid Metabolism**. *Plant Cell* 1995, **7**(7):1085-1097. doi:10.1105/tpc.7.7.1085
75. Huang J, Gu M, Lai Z, Fan B, Shi K, Zhou YH, Yu JQ, Chen Z: **Functional analysis of the Arabidopsis PAL gene family in plant growth, development, and response to environmental stress**. *Plant Physiol* 2010, **153**(4):1526-1538. doi:10.1104/pp.110.157370
76. Shi P, Li B, Chen H, Song C, Meng J, Xi Z, Zhang Z: **Iron Supply Affects Anthocyanin Content and Related Gene Expression in Berries of *Vitis vinifera* cv. Cabernet Sauvignon**. *Molecules* 2017, **22**(2). doi:10.3390/molecules22020283
77. Manara A, DalCorso G, Leister D, Jahns P, Baldan B, Furini A: **AtSIA1 AND AtOSA1: two Abc1 proteins involved in oxidative stress responses and iron distribution within chloroplasts**. *New Phytol* 2014, **201**(2):452-465. doi:10.1111/nph.12533
78. Chen CC, Chien WF, Lin NC, Yeh KC: **Alternative functions of Arabidopsis Yellow Stripe-Like3: from metal translocation to pathogen defense**. *PLoS One* 2014, **9**(5):e98008. doi:10.1371/journal.pone.0098008
79. Chu HH, Chiecko J, Punshon T, Lanzirotti A, Lahner B, Salt DE, Walker EL: **Successful reproduction requires the function of Arabidopsis Yellow Stripe-Like1 and Yellow Stripe-Like3 metal-nicotianamine transporters in both vegetative and reproductive structures**. *Plant Physiol* 2010, **154**(1):197-210. doi:10.1104/pp.110.159103
80. Ravet K, Touraine B, Boucherez J, Briat JF, Gaymard F, Cellier F: **Ferritins control interaction between iron homeostasis and oxidative stress in Arabidopsis**. *Plant J* 2009, **57**(3):400-412. doi:10.1111/j.1365-313X.2008.03698.x
81. Ravet K, Touraine B, Kim SA, Cellier F, Thomine S, Guerinot ML, Briat JF, Gaymard F: **Post-translational regulation of AtFER2 ferritin in response to intracellular iron trafficking during fruit development in Arabidopsis**. *Mol Plant* 2009, **2**(5):1095-1106. doi:10.1093/mp/ssp041
82. Conte S, Stevenson D, Furner I, Lloyd A: **Multiple antibiotic resistance in Arabidopsis is conferred by mutations in a chloroplast-localized transport protein**. *Plant Physiol* 2009, **151**(2):559-573. doi:10.1104/pp.109.143487
83. Xu XM, Adams S, Chua NH, Moller SG: **AtNAP1 represents an atypical SufB protein in Arabidopsis plastids**. *J Biol Chem* 2005, **280**(8):6648-6654. doi:10.1074/jbc.M413082200

84. Moyer MM, Singer SD, Davenport JR, Hoheisel G-A: **Vineyard Nutrient Management in Washington State**. In.: Washington State University Extension; 2018: 1-45.
85. Dal Santo S, Tornielli GB, Zenoni S, Fasoli M, Farina L, Anesi A, Guzzo F, Delledonne M, Pezzotti M: **The plasticity of the grapevine berry transcriptome**. *Genome Biol* 2013, **14**(6):r54. doi:10.1186/gb-2013-14-6-r54
86. Dal Santo S, Fasoli M, Negri S, D'Inca E, Vicenzi N, Guzzo F, Tornielli GB, Pezzotti M, Zenoni S: **Plasticity of the Berry Ripening Program in a White Grape Variety**. *Front Plant Sci* 2016, **7**:970. doi:10.3389/fpls.2016.00970
87. Sun R, He F, Lan Y, Xing R, Liu R, Pan Q, Wang J, Duan C: **Transcriptome comparison of Cabernet Sauvignon grape berries from two regions with distinct climate**. *J Plant Physiol* 2015, **178**:43-54. doi:10.1016/j.jplph.2015.01.012
88. Wen YQ, Zhong GY, Gao Y, Lan YB, Duan CQ, Pan QH: **Using the combined analysis of transcripts and metabolites to propose key genes for differential terpene accumulation across two regions**. *BMC Plant Biol* 2015, **15**:240. doi:10.1186/s12870-015-0631-1
89. Young PR, Eyeghe-Bickong HA, du Plessis K, Alexandersson E, Jacobson DA, Coetzee Z, Deloire A, Vivier MA: **Grapevine Plasticity in Response to an Altered Microclimate: Sauvignon Blanc Modulates Specific Metabolites in Response to Increased Berry Exposure**. *Plant Physiol* 2016, **170**(3):1235-1254. doi:10.1104/pp.15.01775
90. Singh B, Sharma RA: **Plant terpenes: defense responses, phylogenetic analysis, regulation and clinical applications**. *3 Biotech* 2015, **5**(2):129-151. doi:10.1007/s13205-014-0220-2
91. Zhang P, Barlow S, Krstic M, Herderich M, Fuentes S, Howell K: **Within-Vineyard, Within-Vine, and Within-Bunch Variability of the Rotundone Concentration in Berries of Vitis vinifera L. cv. Shiraz**. *J Agric Food Chem* 2015, **63**(17):4276-4283. doi:10.1021/acs.jafc.5b00590
92. Ou C, Du X, Shellie K, Ross C, Qian MC: **Volatile compounds and sensory attributes of wine from Cv. Merlot (Vitis vinifera L.) grown under differential levels of water deficit with or without a kaolin-based, foliar reflectant particle film**. *J Agric Food Chem* 2010, **58**(24):12890-12898. doi:10.1021/jf102587x
93. Degu A, Ayenew B, Cramer GR, Fait A: **Polyphenolic responses of grapevine berries to light, temperature, oxidative stress, abscisic acid and jasmonic acid show specific developmental-**

**dependent degrees of metabolic resilience to perturbation.**

*Food Chem* 2016, **212**:828-836.

doi:10.1016/j.foodchem.2016.05.164

94. Rienth M, Torregrosa L, Luchaire N, Chatbanyong R, Lecourieux D, Kelly MT, Romieu C: **Day and night heat stress trigger different transcriptomic responses in green and ripening grapevine (*vitis vinifera*) fruit.** *BMC Plant Biol* 2014, **14**:108. doi:10.1186/1471-2229-14-108
95. Bonada M, Sadras VO: **Review: critical appraisal of methods to investigate the effect of temperature on grapevine berry composition.** *Aust J Grape Wine Res* 2015, **21**(1):1-17. doi:10.1111/ajgw.12102
96. Bock A, Sparks TH, Estrella N, Menzel A: **Climate-Induced Changes in Grapevine Yield and Must Sugar Content in Franconia (Germany) between 1805 and 2010.** *PLOS ONE* 2013, **8**(7):e69015. doi:10.1371/journal.pone.0069015
97. Petrie PR, Sadras VO: **Advancement of grapevine maturity in Australia between 1993 and 2006: putative causes, magnitude of trends and viticultural consequences.** *Aust J Grape Wine Res* 2008, **14**(1):33-45. doi:10.1111/j.1755-0238.2008.00005.x
98. Jones GV, Davis RE: **Climate influences on grapevine phenology, grape composition, and wine production and quality for Bordeaux, France.** *Amer J Enol Vitic* 2000, **51**(3):249-261.
99. Duchêne E, Schneider C: **Grapevine and climatic changes: a glance at the situation in Alsace.** *Agron Sustain Dev* 2005, **25**(1):93-99.
100. Sadras VO, Moran MA: **Elevated temperature decouples anthocyanins and sugars in berries of Shiraz and Cabernet Franc.** *Aust J Grape Wine Res* 2012, **18**(2):115-122. doi:10.1111/j.1755-0238.2012.00180.x
101. Buttrose MS, Hale CR, Kliwer WM: **Effect of Temperature on the Composition of 'Cabernet Sauvignon' Berries.** *Amer J Enol Vitic* 1971, **22**(2):71.
102. Guillaumie S, Fouquet R, Kappel C, Camps C, Terrier N, Moncomble D, Dunlevy JD, Davies C, Boss PK, Delrot S: **Transcriptional analysis of late ripening stages of grapevine berry.** *BMC Plant Biol* 2011, **11**:165. doi:10.1186/1471-2229-11-165
103. Zelleke A, Kliwer WM: **Influence of Root Temperature and Rootstock on Budbreak, Shoot Growth, and Fruit**

**Composition of Cabernet Sauvignon Grapevines Grown under Controlled Conditions.** *Amer J Enol Vitic* 1979, **30**(4):312.

104. Bergqvist J, Dokoozlian N, Ebisuda N: **Sunlight Exposure and Temperature Effects on Berry Growth and Composition of Cabernet Sauvignon and Grenache in the Central San Joaquin Valley of California.** *Amer J Enol Vitic* 2001, **52**(1):1.
105. Kliewer WM, Dokoozlian NK: **Leaf Area/Crop Weight Ratios of Grapevines: Influence on Fruit Composition and Wine Quality.** *Amer J Enol Vitic* 2005, **56**(2):170.
106. Triolo R, Roby JP, Plaia A, Hilbert G, Buscemi S, Di Lorenzo R, van Leeuwen C: **Hierarchy of Factors Impacting Grape Berry Mass: Separation of Direct and Indirect Effects on Major Berry Metabolites.** *Amer J Enol Vitic* 2018, **69**(2):103.
107. Liu Y, Bassham DC: **Autophagy: pathways for self-eating in plant cells.** *Annu Rev Plant Biol* 2012, **63**:215-237.  
doi:10.1146/annurev-arplant-042811-105441
108. Destrac-Irvine A, Van Leeuwen C: **The VitAdapt project: extensive phenotyping of a wide range of varieties in order to optimize the use of genetic diversity within the *Vitis vinifera* species as a tool for adaptation to a changing environment.** Villnave D'Ornon, France: Vigne & Vin Publications Internationales; 2017.
109. Ghan R, Van Sluyter SC, Hochberg U, Degu A, Hopper DW, Tillet RL, Schlauch KA, Haynes PA, Fait A, Cramer GR: **Five omic technologies are concordant in differentiating the biochemical characteristics of the berries of five grapevine (*Vitis vinifera* L.) cultivars.** *BMC Genomics* 2015, **16**(1):946.  
doi:10.1186/s12864-015-2115-y
110. Reid KE, Olsson N, Schlosser J, Peng F, Lund ST: **An optimized grapevine RNA isolation procedure and statistical determination of reference genes for real-time RT-PCR during berry development.** *BMC Plant Biol* 2006, **6**:27.  
doi:10.1186/1471-2229-6-27
111. Andrews S: **FastQC.** In. <https://www.bioinformatics.babraham.ac.uk/projects/fastqc/>; 2014.
112. Bolger AM, Lohse M, Usadel B: **Trimmomatic: a flexible trimmer for Illumina sequence data.** *Bioinformatics* 2014, **30**(15):2114-2120. doi:10.1093/bioinformatics/btu170
113. Sonesson C, Love MI, Robinson MD: **Differential analyses for RNA-seq: transcript-level estimates improve gene-level**

- inferences.** *F1000Res* 2015, **4**:1521.  
doi:10.12688/f1000research.7563.2
114. Langfelder P, Horvath S: **WGCNA: an R package for weighted correlation network analysis.** *BMC Bioinformatics* 2008, **9**:559.  
doi:10.1186/1471-2105-9-559
115. Langfelder P, Horvath S: **Fast R Functions for Robust Correlations and Hierarchical Clustering.** *J Stat Softw* 2012, **46**(11).
116. Buchfink B, Xie C, Huson DH: **Fast and sensitive protein alignment using DIAMOND.** *Nat Methods* 2014, **12**:59.  
doi:10.1038/nmeth.3176
117. Cheng CY, Krishnakumar V, Chan AP, Thibaud-Nissen F, Schobel S, Town CD: **Araport11: a complete reannotation of the Arabidopsis thaliana reference genome.** *Plant J* 2017, **89**(4):789-804. doi:10.1111/tpj.13415
118. Kersey PJ, Allen JE, Allot A, Barba M, Boddu S, Bolt BJ, Carvalho-Silva D, Christensen M, Davis P, Grabmueller C, Kumar N, Liu Z, Maurel T, Moore B, McDowall MD, Maheswari U, Naamati G, Newman V, Ong CK, Paulini M, Pedro H, Perry E, Russell M, Sparrow H, Tapanari E, Taylor K, Vullo A, Williams G, Zadissia A, Olson A *et al*: **Ensembl Genomes 2018: an integrated omics infrastructure for non-vertebrate species.** *Nucleic Acids Res* 2018, **46**(D1):D802-D808. doi:10.1093/nar/gkx1011
119. **topGO: Enrichment Analysis for Gene Ontology. R package version 2.36.0.** [<http://www.mpi-sb.mpg.de/~alexa>]
120. Leinonen R, Sugawara H, Shumway M, International Nucleotide Sequence Database C: **The sequence read archive.** *Nucleic Acids Res* 2011, **39**(Database issue):D19-21.  
doi:10.1093/nar/gkq1019

PC2: 22% variance

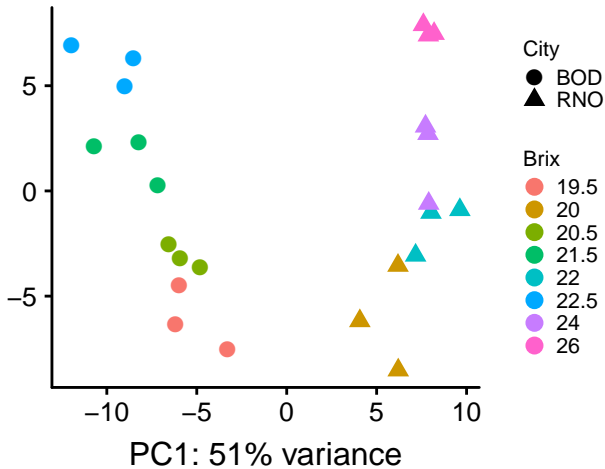

**EXL2 (g068700)**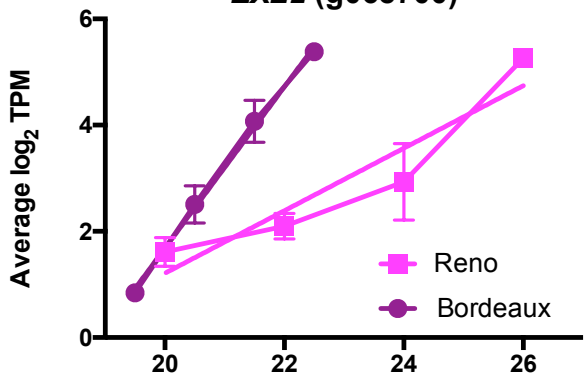**HB12 (g223410)**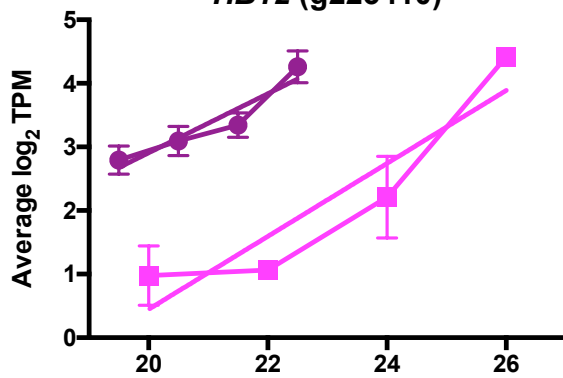**BSMT1 (g336810)**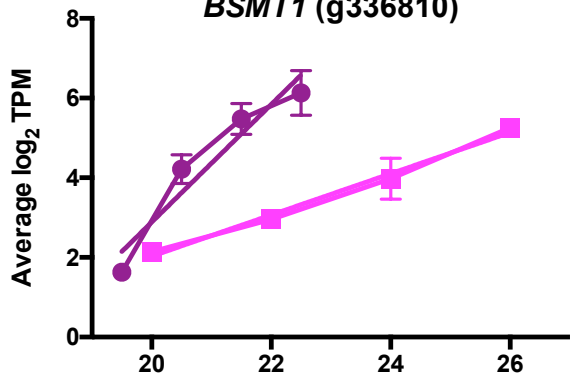**HAD (g070140)**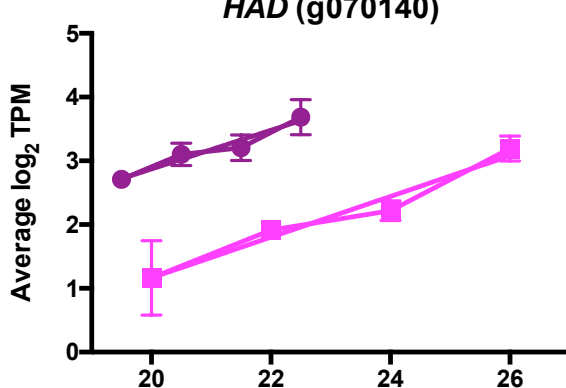**STS24 (g435870)**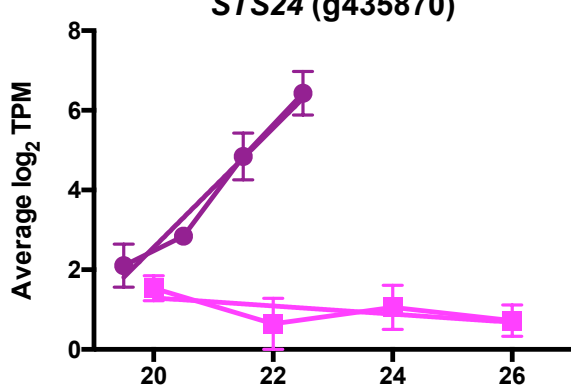**NAC073 (g125400)**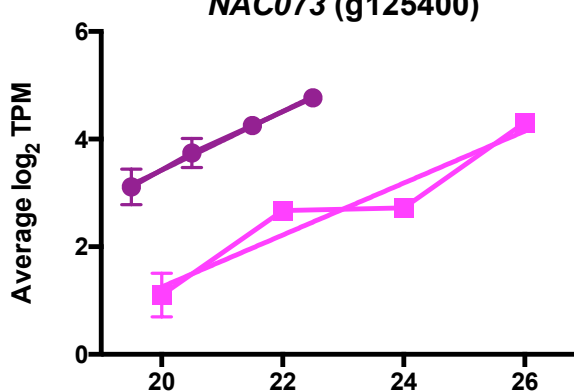**TPS35 (g087040)**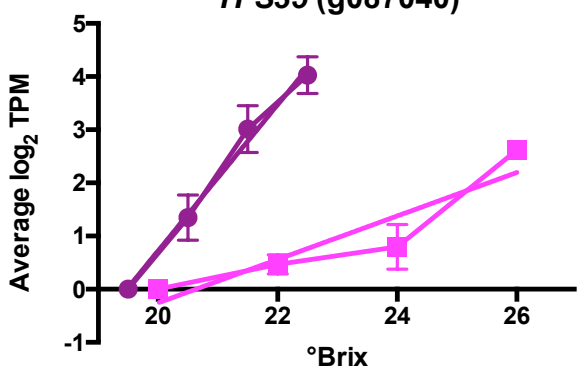**MAT3 (g013310)**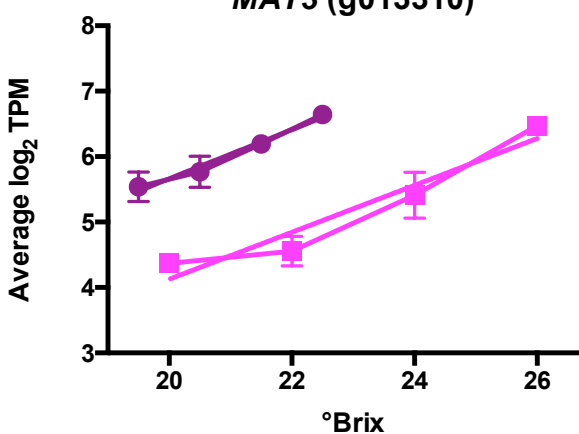



**GDSL Lipase (g378310)**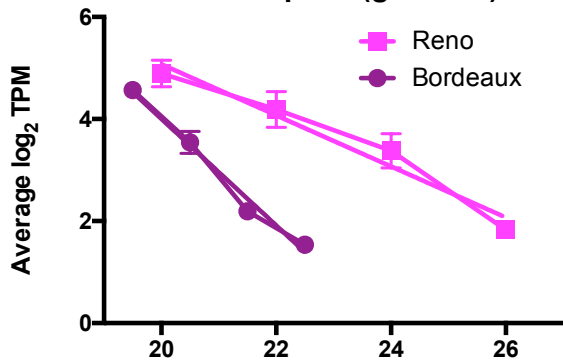**Bifunctional inhibitor lipid-transfer (g328890)**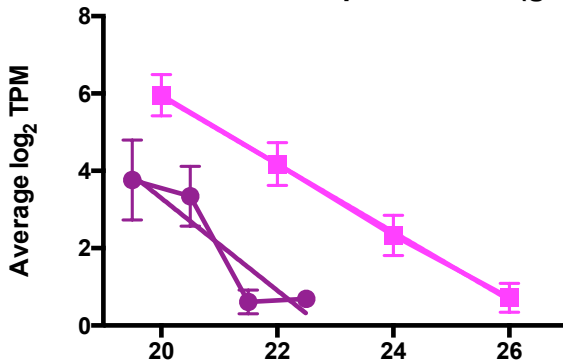**LRR (g065660)**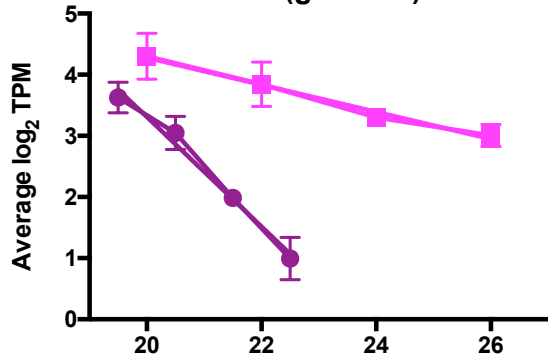**DUF642 (g461310)**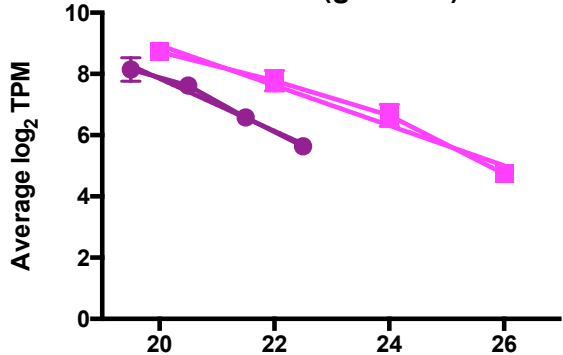**Extensin like (g304570)**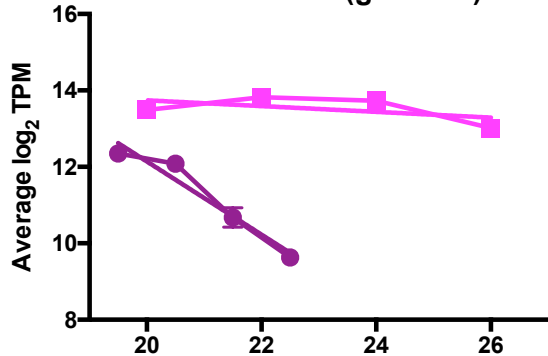**Ripening-related-like (g431980)**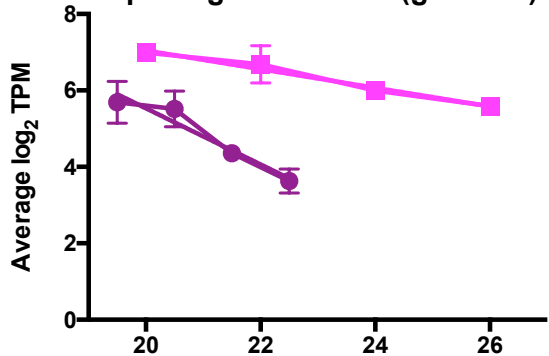**TIP1;1 (g019250)**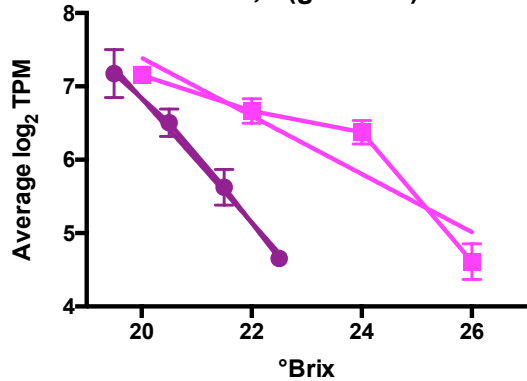**Chorismate synthase (g126160)**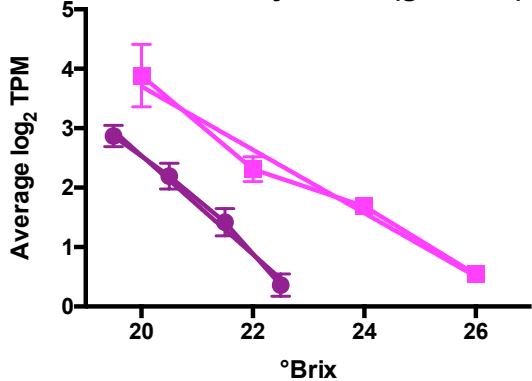

***ATG18g* (Vitvi07g00210)**

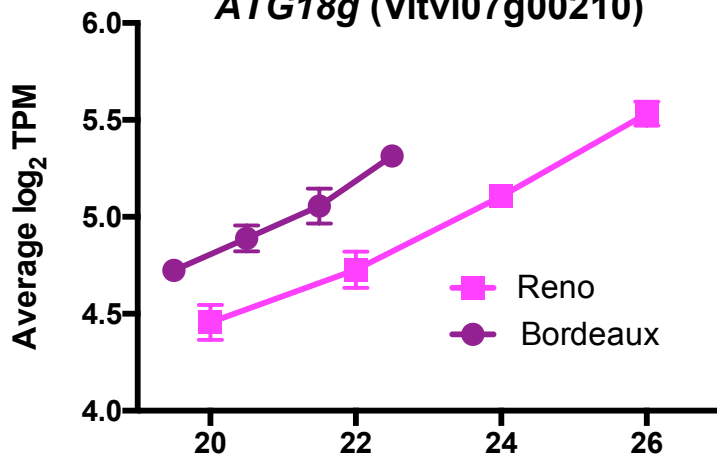

***APG9* (Vitvi07g00580)**

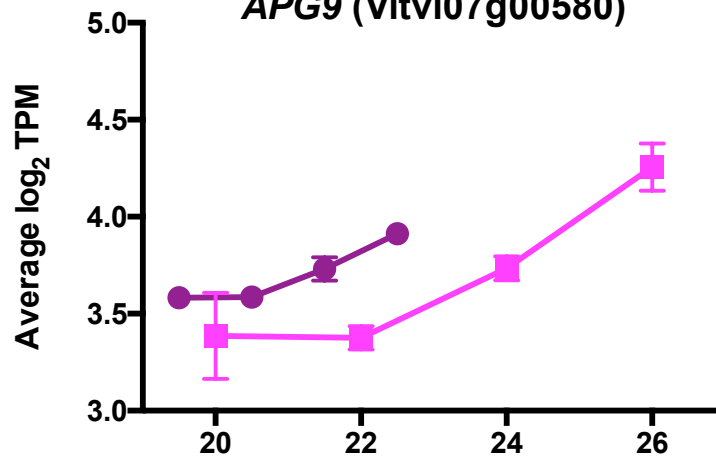

***ATG11* (Vitvi11g00777)**

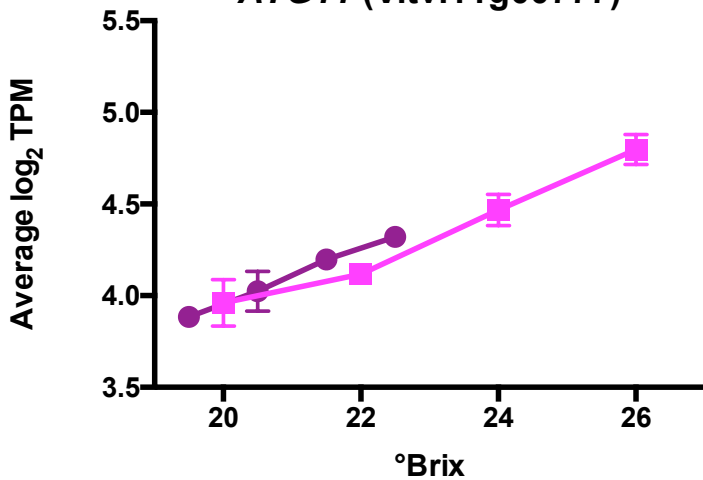

***ATG2* (Vitvi03g00492)**

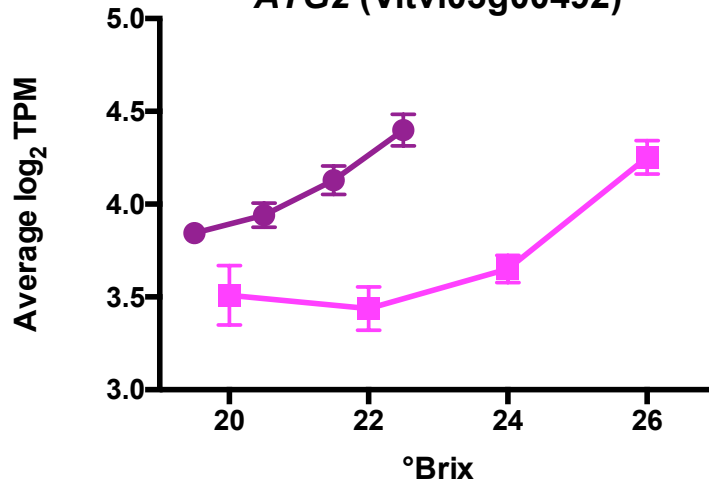

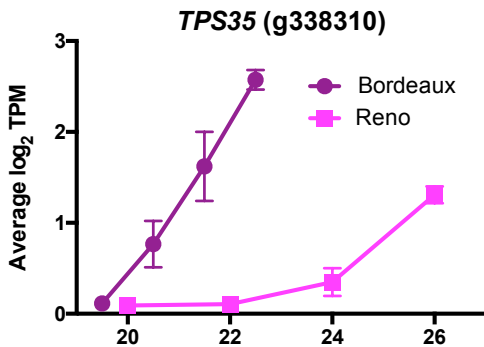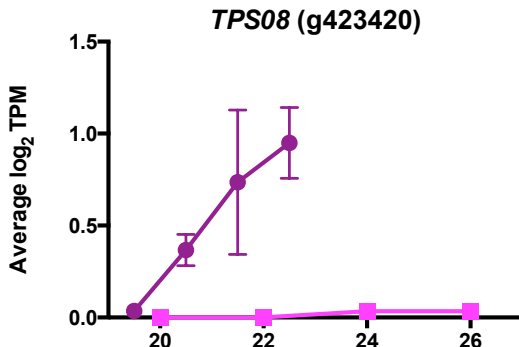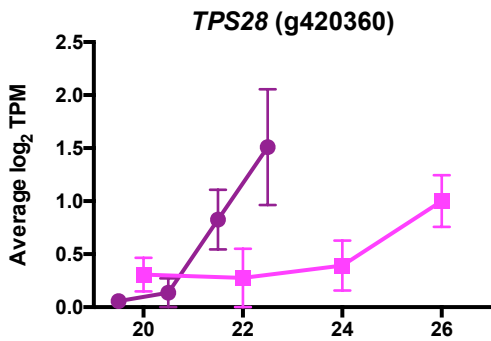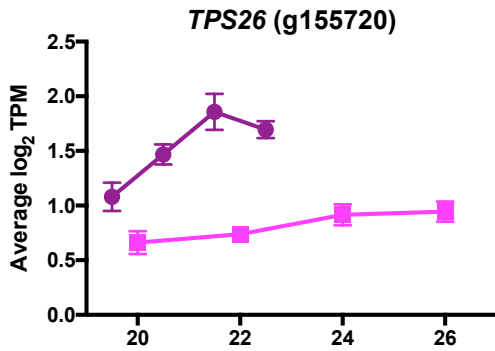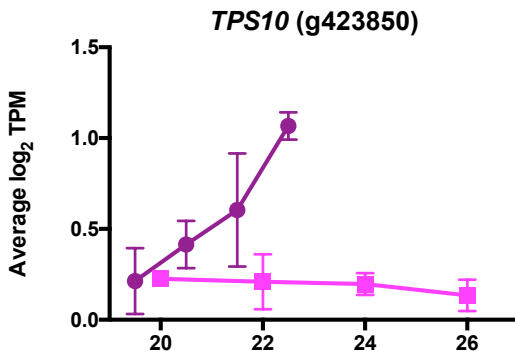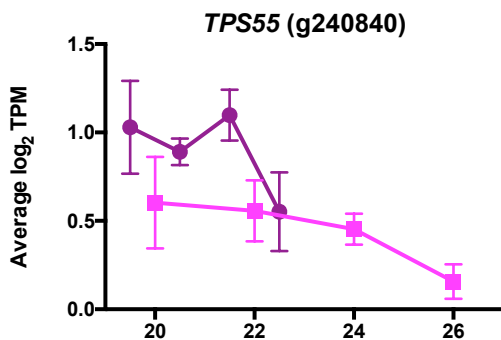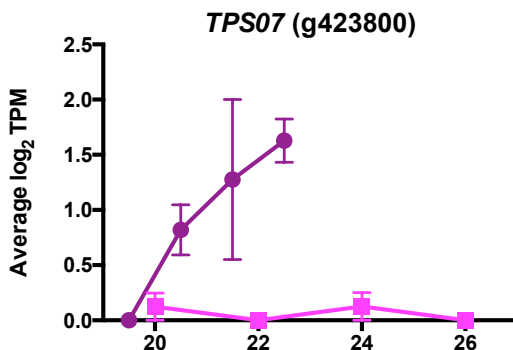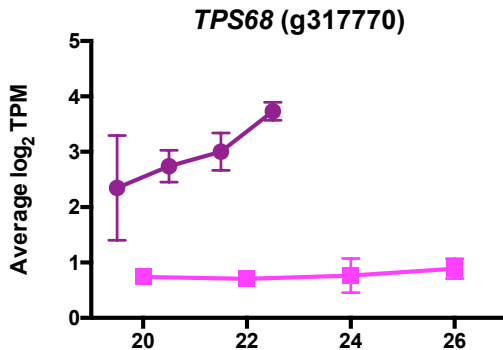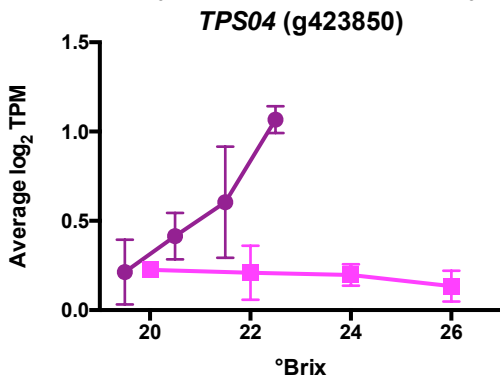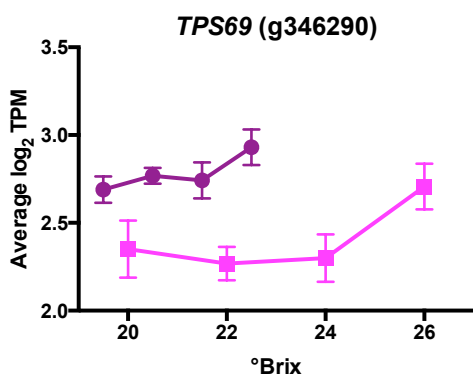

***PAL1* (g533070)**

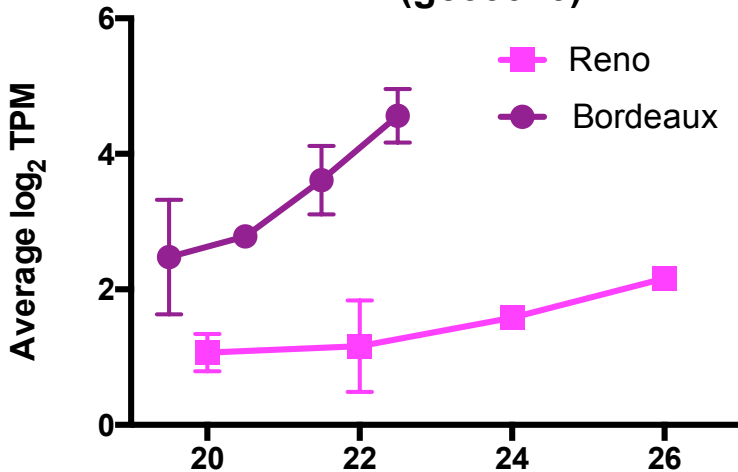

***DHS1* (g082490)**

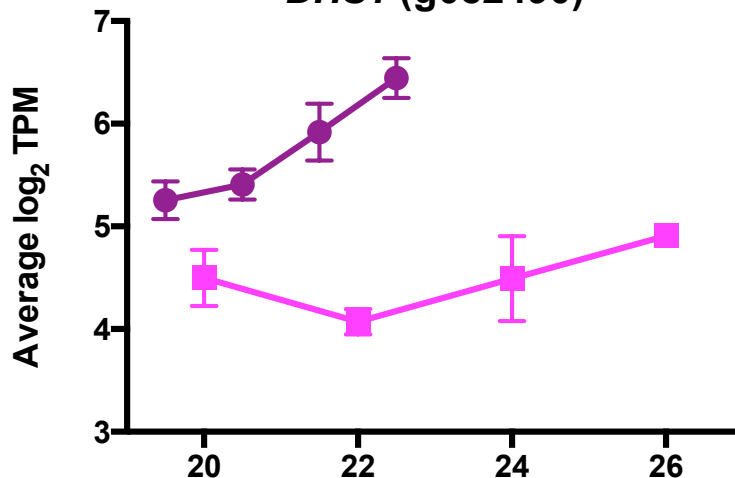

***BCAT5* (g220210)**

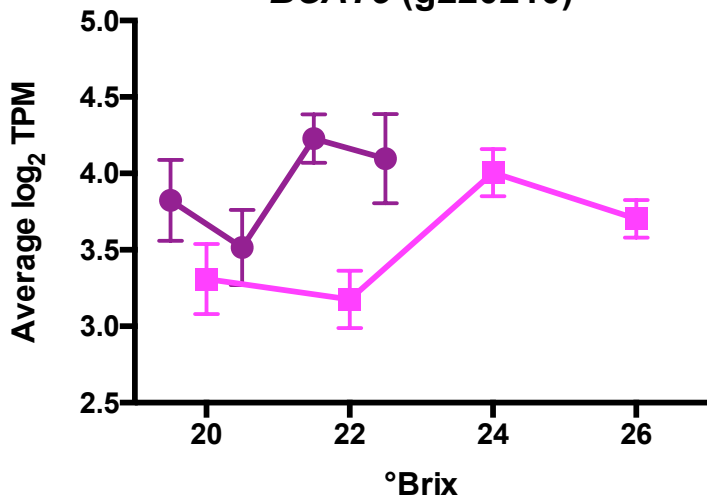

***TAT7* (g116950)**

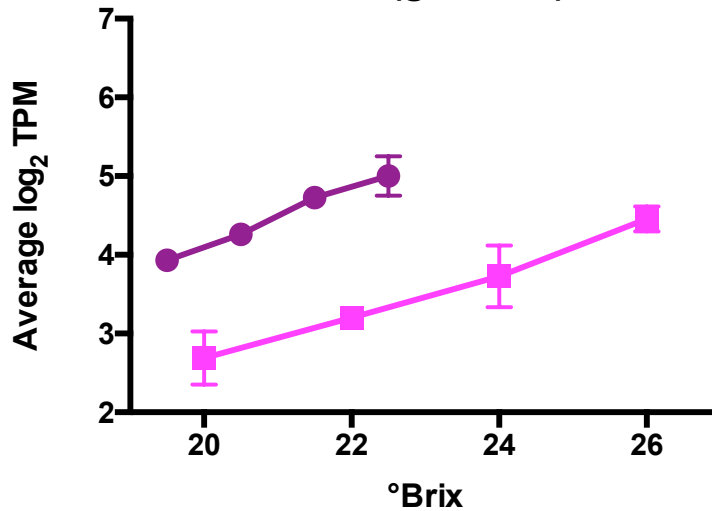

# Simplified Clock Model

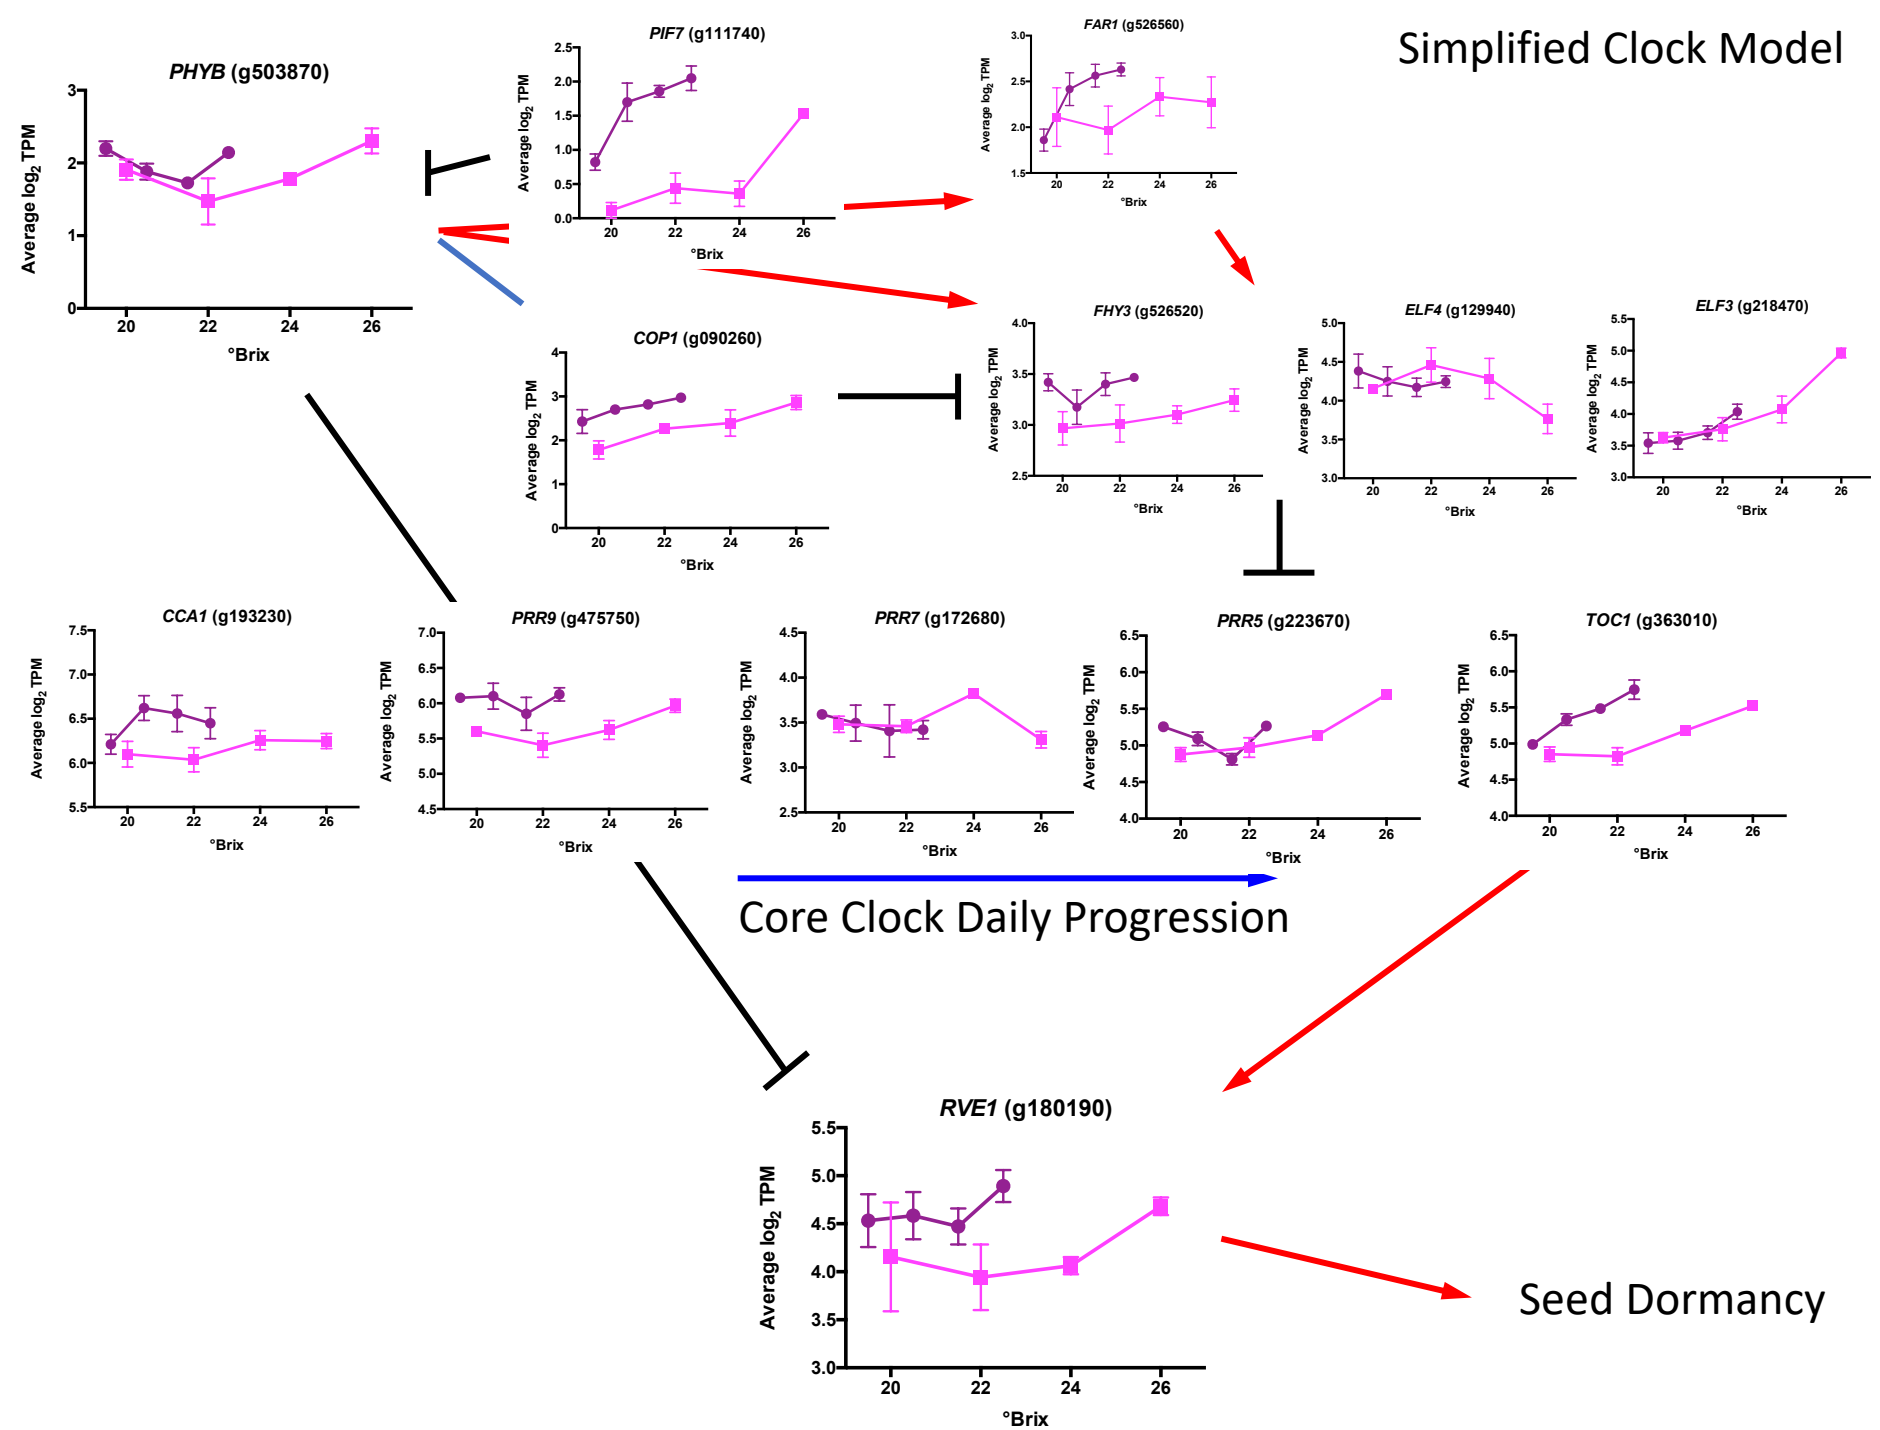

**CBF1 (g435450)**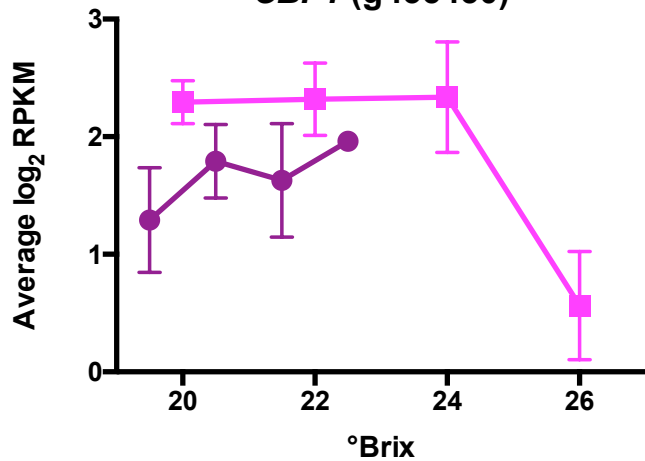**IDD14 (g000790)**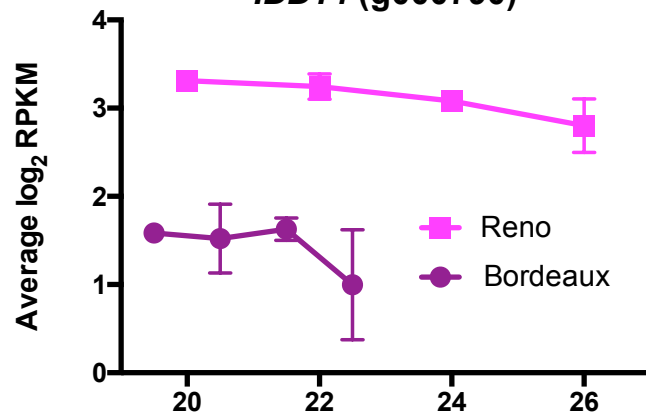**CML41 (g041290)**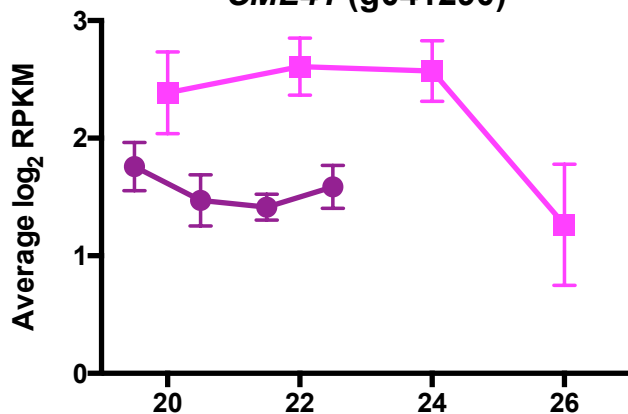**CYSB (g023260)**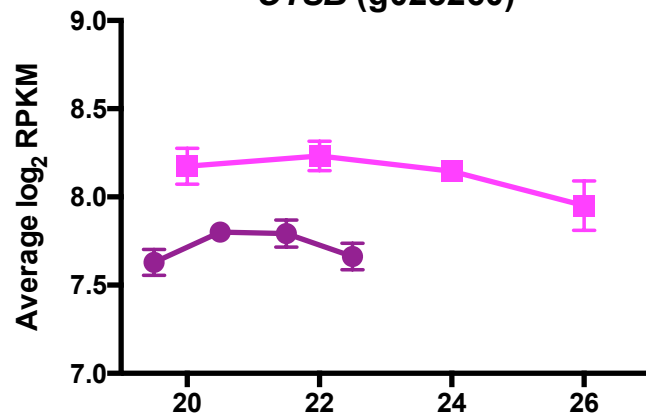**XTH23 (g572510)**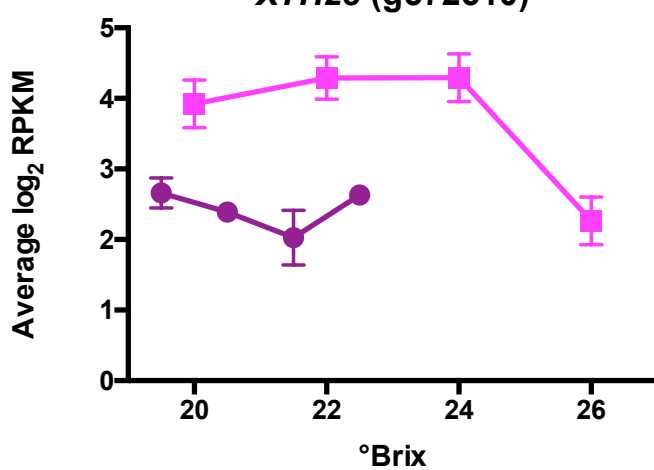**SULTR3;4 (g392710)**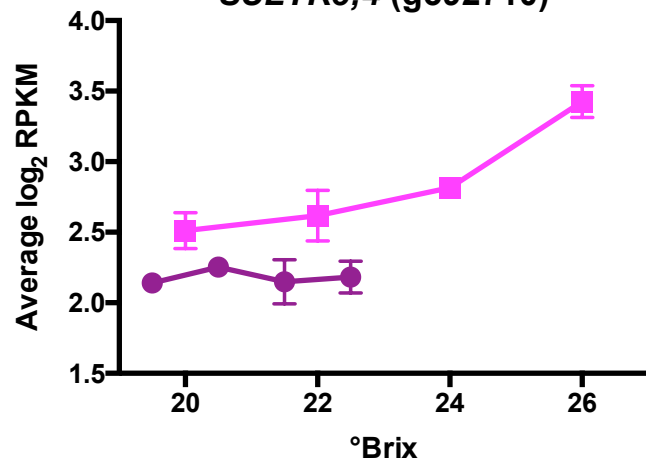

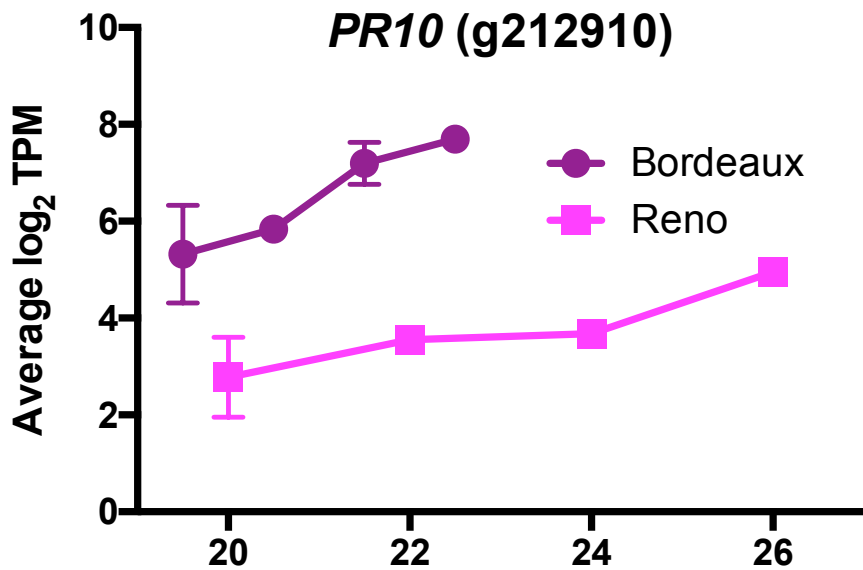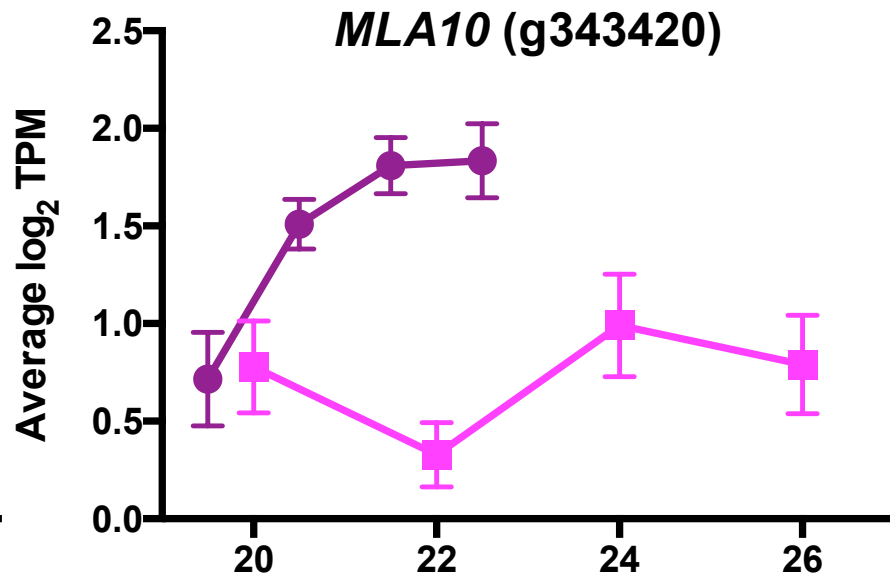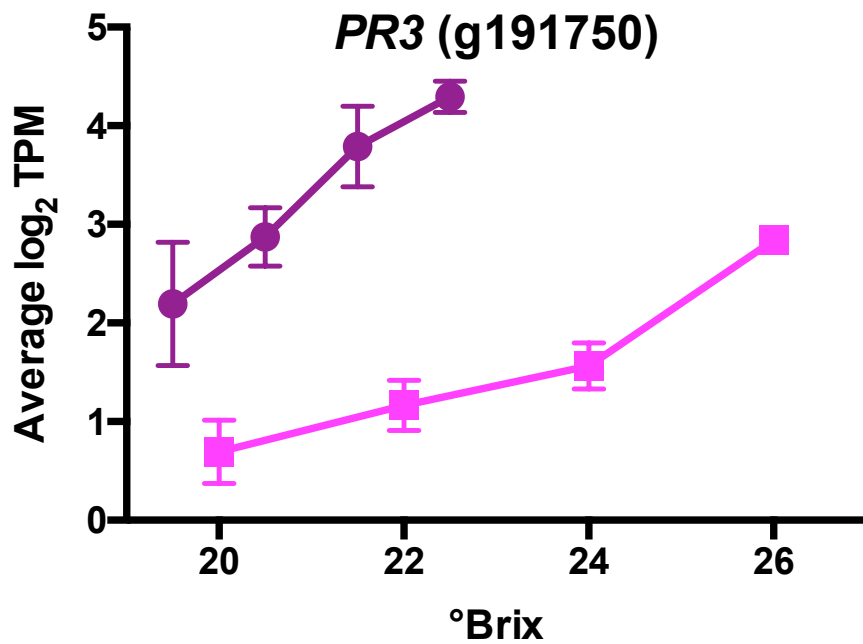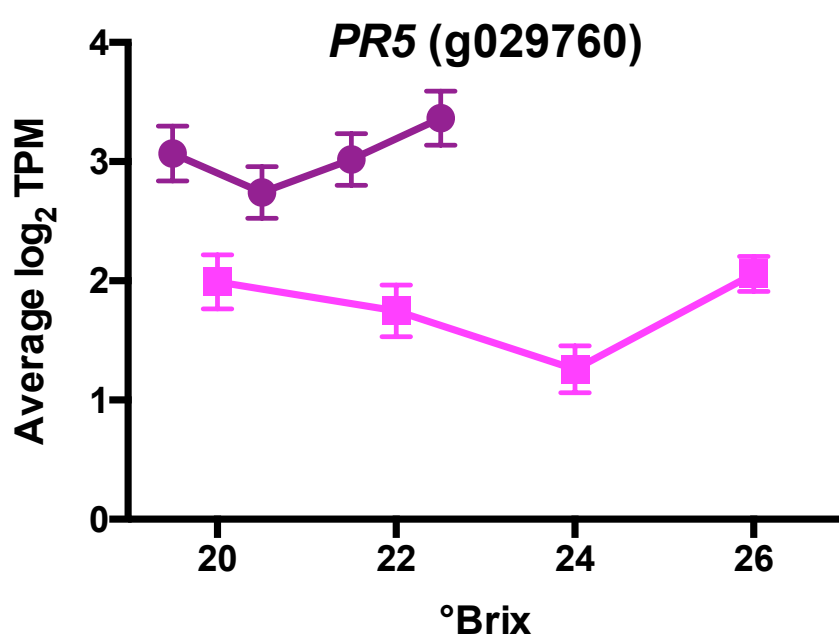

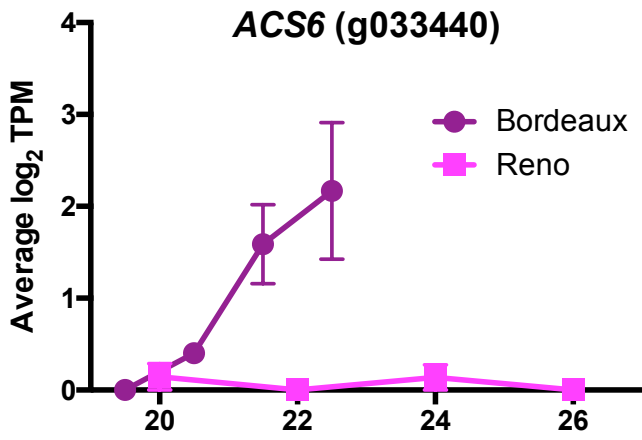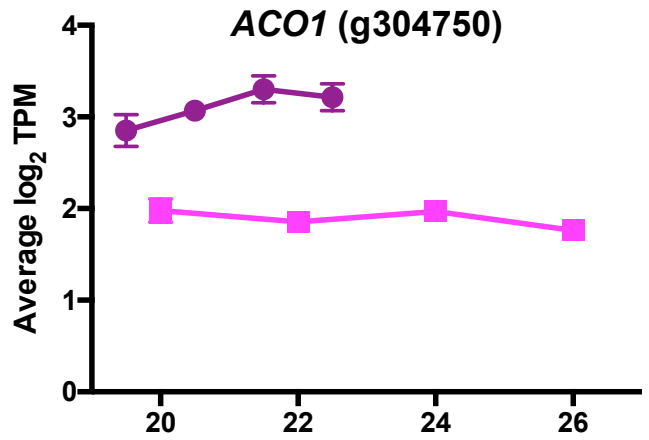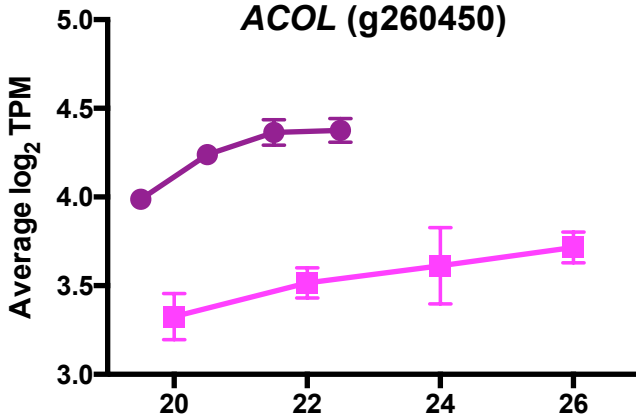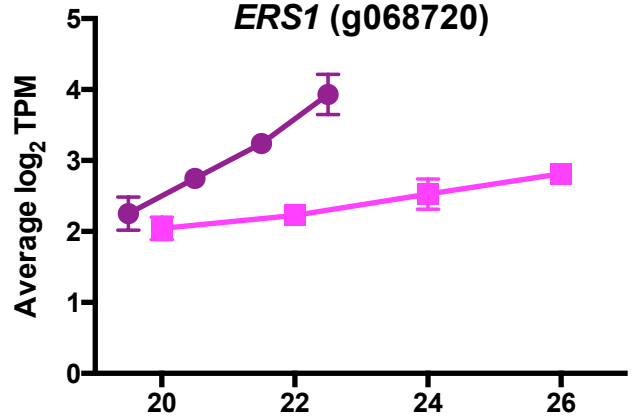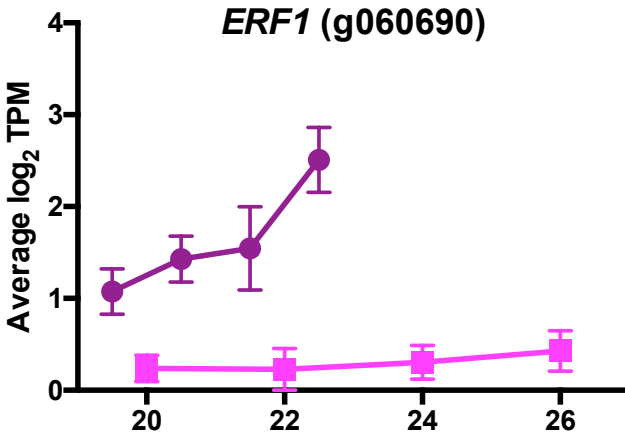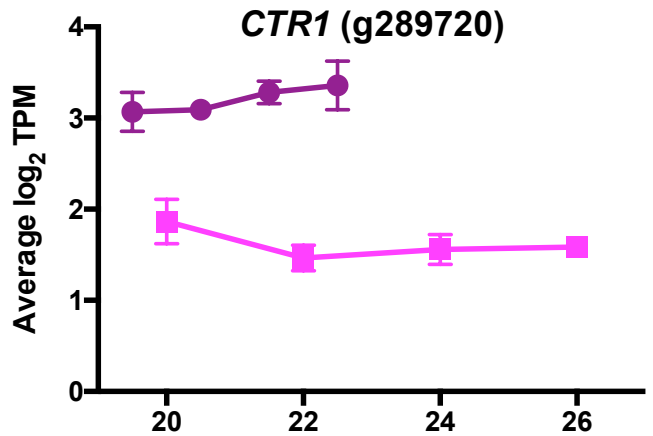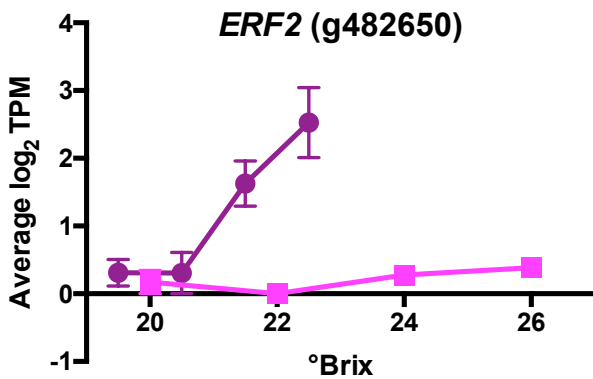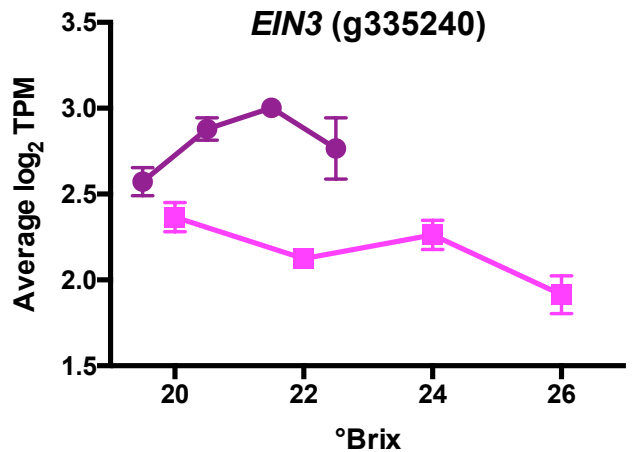



**SIA1 (g336700)**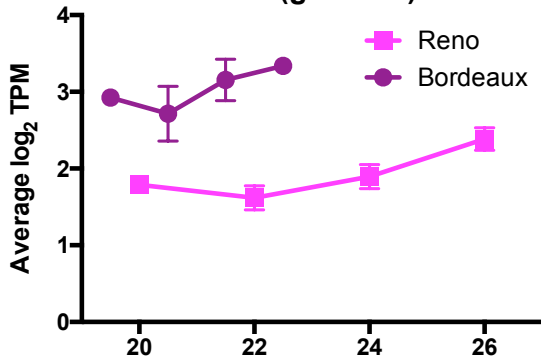**VIT1 (g001160)**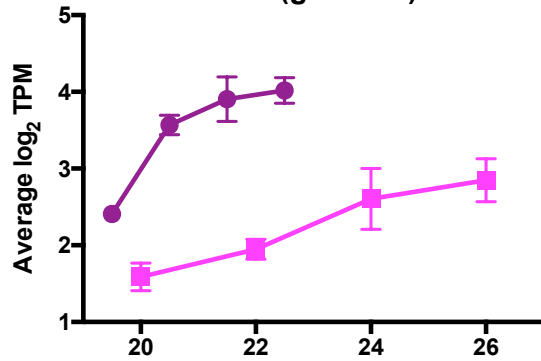**ATH13 (g146610)**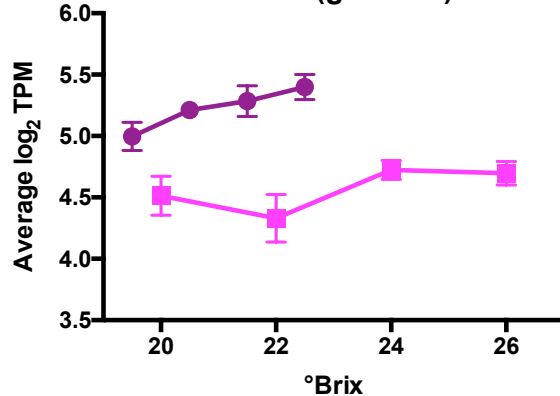**IREG3 (g098530)**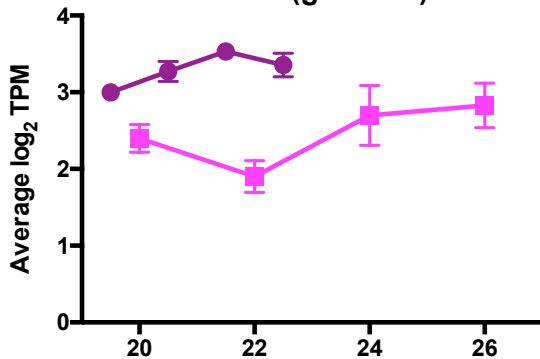**ABC18 (g163790)**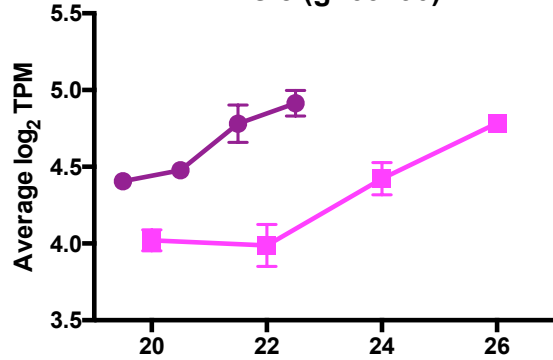**YSL3 (g223320)**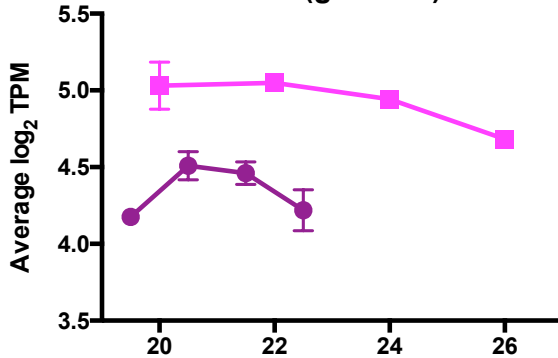**FER1 (g606560)**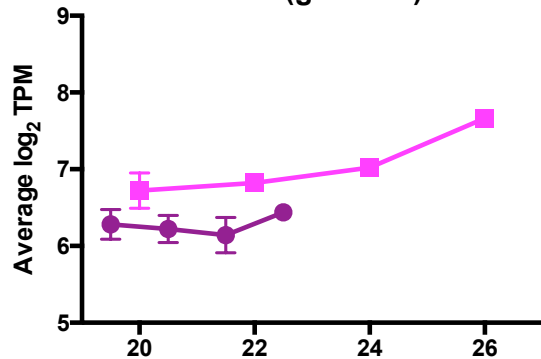**NRAMP3 (g413920)**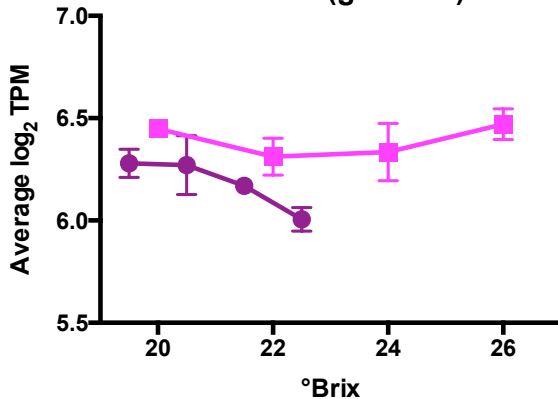

Source: https://www.biorxiv.org/content/10.1101/729236v3.full.pdf
